# Supplementary material for: Comparative Proteomic Profiling between Each of Two Consecutive Developmental Stages of the Solanum Fruit Fly, Bactrocera latifrons (Hendel)
Source: MDPI journal article supplement (doi:10.3390/ijms19071996), 2018-07-09

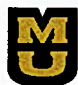

Charles W. Gehrke Proteomics Center  
Research Core Facilities  
University of Missouri–Columbia  
www.proteomics.missouri.edu

214 Bond Life Sciences Center  
1201 East Rollins Road  
Columbia, MO 65211  
Dr. Brian Mooney, Assoc. Dir. (573) 884-7374  
FAX (573) 884-9676  
Mass Spectrometry (B. DaGue) (573) 882-5481

## Analyst's Report

### Sample Identification:

Date submitted: May 12, 2016

Submitted by: Dr. Cynthia L. Goodman (573-876-8303)  
and Dr. Stella Chang, USDA-ARS, Hilo, Hawaii (808-959-4312)

P.I.: Dr. David Stanley, USDA, ARS, BCIRL, Research Park, Columbia, MO

MOCode: DN778

Sample(s):

112 trypsin digests of Coomassie Blue (G250)-stained 2-D gel plugs (pI range 3-10) were submitted on 5/12/2016. The samples were from *Bactrocera latifrons*.

MALDI TOF/TOF MS plus MS/MS analyses were requested.

The data for the samples were to be queried initially against the NCBI *B. latifrons* protein database. **This database was downloaded from the NCBI website and added to the old Mascot Server in the Proteomics Center on February 24, 2016.**

### Comments Regarding Results:

The NCBI *Bactrocera latifrons* database downloaded from NCBI on February 24, 2016, was incomplete at that time. A significant number of the sample digests contained peptides which provided high-quality MS/MS which were not assigned with statistically significant ion scores to proteins in the *B. lat.* database. Either *de novo* analysis of the poorly matched MS/MS spectra or searches against the NCBI Insects database (as of 2/20/2015) showed the MS/MS to match more closely with proteins from other insects, in particular proteins from *B. dorsalis*. This was especially true for the digests of the high molecular weight proteins observed in "Egg." Transferrin was one of the high molecular weight proteins in "Egg" which was generally assigned a relatively low score most likely because the sequence for transferrin in the *B. lat.* database is only a partial sequence. By comparison, assignment of peptides to transferrin from *B. dor.* was much more convincing in the search vs. Insects. Unless the sample source was contaminated with *B. dor.* Egg proteins, these results suggest that the sequence of transferrin is well-conserved in these two *Bactrocera* species.

Intensely stained spots in a gel may leach protein during destaining of the gel. This leached protein can in turn contaminate nearby regions of the gel. As a consequence, digests of weak protein spots may show peptides derived from nearby intensely-stained protein spots. Furthermore, it is quite difficult to cleanly excise weak protein spots located adjacent to high abundance spots, and some cross-contamination would be expected.

For strings of protein spots differing by pI which are assigned to the same or similar proteins in a database search, it is generally very difficult to assess what is unique about each of the individual spots. In part this is the result of mixtures of modifications present in varying proportions in each of the gel spots in the string, with the relative amounts of some modifications being low. As an example, the five LAT E protein spots 633, 646, 640, 643, and 650 (listed from most basic to most acidic), were all assigned to one or both heat shock protein 23s (HSP23), gi| 880914899 or gi| 880898980 in *B. lat.* database searches. In order to account for more of the intense peptides seen in the digests of these proteins, the searches allowed the variable modifications Asparagine Deamidation,

and Acetylation of the protein N-terminus in addition to the usual Methionine oxidation and Pyroglutamate formation at peptide N-terminal Glutamine or peptide N-terminal Glutamate. The higher scores were for gi|880914899 (theor. pI 7.11) for all but spot 650. Examination of the MS spectra for these samples showed that as one progressed from the most basic to the most acidic spot, the relative amounts of oxidation and deamidation of the HSP23 gi|880914899 increased. Conversion of Asparagine to Aspartic Acid would indeed make the protein more acidic. Peptides corresponding to the N-terminal acetylated forms of both of the proteins were seen in the spectra and would be expected to result in a more acidic protein relative to the non-acetylated protein. (However, the expected non-acetylated N-terminal peptides were not clearly observed in any of these spot digests.) In addition, the amounts of the second HSP23, gi|880898980 (theor. pI 5.96), were seen to increase as the pI of the spots decreased, with spot 650 containing essentially only HSP23 gi|880898980. However, the modification which resulted in the pI difference between the two spots 643 and 650 containing HSP23 gi|880898980 was not at all evident from the MS spectra. Thus, the picture is complex. Often recovery or ionization efficiency of the modified peptides is not sufficient to aid in the assessment of the changes occurring in a given protein as a function of the treatment of the organism. Furthermore, methionine oxidation and asparagine deamidation are among those peptide modifications which are often considered to be artifacts of sample preparation, sample storage, or the alkaline conditions used for trypsin digestion. (See attachment 1 at the end of the report.)

In the course of cross-checking spectra and database search results, an interesting comparison was seen between the larval proteins LAT L-ID2487 and LAT L-ID2483. Both appeared to be about 20 KDa, and they were near each other in the gel (image 3). LAT L-ID2487 was the less abundant and more acidic protein of the two. While the MS spectra for both samples contained ions which could be assigned to *B. lat.* "Hypothetical protein c0\_g2\_i1" (gi|880815061), there was one especially intense peptide ion at  $m/z$  2261.15 Da which appeared ONLY in the MS of LAT L-ID2487. *De novo* sequence analysis of the MS/MS spectrum for  $m/z$  2261.15 combined with a query against the NCBI Inr Insects database (2/20/2015), indicated with confidence that this peptide (present in several *B. dor.* proteins including gi|751804194) differed by a single amino acid (Proline substituted for Serine) from the major tryptic peptide at  $m/z$  2251.14 seen in LAT L-ID2483 that was assigned to gi|880815061. The triplet codons for Proline are CCN while those for Serine are UCN and AGU/C. A BlastP alignment of the sequences for gi|880815061 and gi|751804194 showed 95% identity between the two proteins. One question raised by these results is whether or not the major protein component in LAT L-ID2487 is a *B. lat.* variant (which is not in the *B. lat.* database at this time) of the major protein component of LAT L-ID2483. OR is it possible that the LAT L-ID2487 protein is present as a consequence of the presence of *B. dor.* insect proteins in the source material thought to be purely from *B. lat.*? (See attachment 2 at the end of the report.)

The Investigators are encouraged to cross-check the precursor mass lists for each sample shown in the Spot Set tables against the database search results to see how many and which precursor ions were matched with better scores to proteins from insects other than *B. lat.* Any sample for which the database search results were inconsistent with the intensity of the Coomassie Blue staining should be evaluated in terms of the intensity of the ions in the MS spectra (which can be provided as needed), the quality of the MS/MS spectra (which can also be provided as needed), the number of MS/MS assigned, and the scores for the assigned MS/MS spectra from both database searches. The Analyst can provide assistance with this process upon request.

It must be pointed out that the protein coverages seen in the database search results Protein Summaries are probably somewhat inflated. The use of a mass error tolerance of  $\pm 200$  ppm for peptide masses and a signal-to-noise threshold of 20 for inclusion of ions in the MS spectrum peak list, will have resulted in some false positive assignments among ions matched on the basis of mass alone.

### **Work Summary and Notes:**

In general, the day prior to analysis, the samples were lyophilized dry, the dry residues were reconstituted in 10  $\mu$ L water, frozen, and dried again overnight. On the day following the overnight drying, the samples were prepared for application to the MALDI target by one of two methods. EITHER Reconstitution Solvent A

consisting of 700/270/30 (V/V/V) acetonitrile/water/10% trifluoroacetic acid, was added to the sample, and only a portion of the sample was then mixed 1/1 (V/V) with the CHCA matrix solution, OR the entire sample was reconstituted in Solution B which was a 1/1 (V/V) mixture of Reconstitution Solvent A and CHCA matrix solution. The method used for each sample has been provided in the summary spreadsheets attached to this report. Portions (0.5-0.7  $\mu$ L) of the sample/matrix mixtures were applied to two different positions on the MALDI target. MALDI TOF/TOF MS (AB Sciex, formerly Applied Biosystems, Inc., 4700 mass spectrometer) survey spectra were obtained from one of the positions for each sample in order to determine the laser setting to be used in the automated spectrum acquisition from a second un-interrogated application of the sample. The 10 most intense ions were analyzed by MS/MS (order of analysis was most intense to least intense).

| Spot Set MS<br>Analysis Start Date | Batch<br>Number | Samples                                        |
|------------------------------------|-----------------|------------------------------------------------|
| 5/19/2016                          | 1               | Digests of well-stained PUPA Samples           |
| 5/24/2016                          | 2               | Digests of well-stained LARVA and MALE Samples |
| 5/26/2016                          | 3               | Digests of well-stained EGG Samples            |
| 6/10/2016                          | 4               | Digests of well-stained FEMALE Samples         |
| 6/14/2016                          | 5               | Digests of remaining poorly-stained Samples    |

In the case of samples for which significant ions in the MS spectrum were not automatically selected for MS/MS ions (although they should have been based on ion intensity), additional MS/MS were obtained from the second application of the sample using manual selection of the precursor ions of interest for MS/MS. (Analyses of 6 samples were repeated for this reason.)

In the case of many of the protein digests from “Egg” samples, there was an abundance of higher molecular weight peptides which were not analyzed in the first automated analysis because the masses of the peptides were greater than the 2500-Da mass cut-off for inclusion in the precursor ion list for automated MS/MS. Consequently, all of the samples in Batch 3 from “Egg” were analyzed a second time with an automated method which specified selection of precursor ions from 2200-4500 Da. **(37 digests from “Egg” samples were analyzed a second time.)**

The spectra were evaluated by the Analyst for spectrum quality and mass accuracy. Most of the samples in this set contained only very low levels of trypsin autolysis peptides. Consequently, all of the samples were analyzed with the default external calibration which was based on analysis of peptide calibration standards applied to a minimum of 6 positions which surrounded the samples on the target. The MS spectra mass error was assessed on the basis of the differences between the precursor ion mass in the original MS spectrum vs. the mass observed for the residual amount of precursor ion seen in the corresponding MS/MS spectrum. Generally, the precursor ion masses found in the MS and MS/MS spectra were within less than 200 ppm of each other.

For these samples, spectra were processed and batch analyzed in the “Combined MS plus MS/MS” mode with the Applied Biosystems GPS Explorer software (vers. 3.6). Database searches were performed with Matrix Science’s Mascot search engine v. 2.4 ([www.matrixscience.com](http://www.matrixscience.com)) on an in-house server (the “Old Mascot Server”) against the NCBI nr “Blat 20160224” database and the NCBI nr Insects database which had been added to the server February 20, 2015. The database search parameters are shown in the following table. In some cases, scores for an assignment were found to be improved if deamidation at Asparagines or Acetylation of the protein N-terminus was added to the variable modifications permitted for the search. These were noted on the Mascot Reports for the *B. lat* searches which have been printed and will be sent to Dr. Chang.



## Final Database Search Parameters \*\*

| Enzyme  | # Missed Cleavages | Mass Error Tolerances |                     | Mascot Scores Required for $p < 0.05$ |                            |                            |                            |
|---------|--------------------|-----------------------|---------------------|---------------------------------------|----------------------------|----------------------------|----------------------------|
|         |                    | Precursor Ions        | MS/MS Fragment Ions | NCBIInr "Blat 20160224"               |                            | NCBIInr Insects (02202015) |                            |
|         |                    |                       |                     | Total Protein Score                   | Individual MS/MS Ion Score | Total Protein Score        | Individual MS/MS Ion Score |
| Trypsin | $\leq 2$           | $\pm 200$ ppm         | $\pm 0.2$ Da        | $> 58$                                | $> \sim 32$                | $> 76$                     | $> 49$                     |

\*\*Carbamidomethylation of Cysteines was a required modification. The permitted variable modifications were Methionine oxidation and Pyroglutamate formation at peptide N-terminal Glutamic acids and peptide N-terminal Glutamines.

The GPS Explorer reports generated from the Matrix Science Mascot reports were saved as PDF files. These PDF files will be sent to Dr. Chang as email attachments. Excel Spreadsheets for the GPS Explorer Protein reports will also be sent to Dr. Chang as email attachments at the same time. These spreadsheets, which contain the names and database accession numbers for the tentatively matched proteins, will provide an easy route to preparing the final summary of the data for all of the samples.

Printed copies of the Mascot Reports for the results of the searches against the *B. lat.* database will be provided to Dr. C. Goodman for transfer to Dr. S. Chang. The Protein Views for the major protein matches have been included in the Mascot Reports. The percent sequence recoveries and the full protein sequences appear in the Protein Views. Only a few selected Mascot Reports from the searches vs. the 2015 NCBIInr Insect database have been printed. These were for samples for which the MS and MS/MS spectra were of high quality, the *B. lat.* database provided only very weak assignments, and better matches were made with other insects (in particular *B. dor.*). Additional printed Mascot reports for the searches vs. the Insects database can be provided upon request.

A flash drive will be provided containing the exported ".t2d" files for the spectra. (The ".t2d" files require the "Data Explorer" program for viewing.) The peak lists from the spectra have also been exported in Mascot Generic Format (mgf) and saved to the flash drive as well if Dr. Chang wishes to have them. Copies of the GPS Explorer report pdfs have been included on the flash drive. Excel Spreadsheets for the Protein Summaries generated by the GPS Explorer software have been created (but not heavily edited into pretty form) and saved to the flash drive to aid the Investigator in preparing her summary tables. Finally, the original spectra for these samples as well as those in the set submitted in February of 2016, have been archived on the flash drive. The original data can only be viewed on the 4700 MALDI TOF/TOF mass spectrometer, so these files should not be opened by the Investigators.

All data has also been archived in the Proteomics Center. All Matrix Science Mascot reports are stored on the Proteomics Center server.

Copies of the printed spectra can be supplied upon request

## Sample Processing and Analytical Methods:

All aqueous solutions were prepared with 18 Mohm x cm water produced by a Millipore Milli-Q Synthesis A10 water purification system. Sigma-Aldrich was the source for alpha-cyano-4-hydroxycinnamic acid (CHCA, Fluka 70990, mass-spec grade) and the peptide components of the Mass Spectrometer calibration mix (see below). Mass Spec-grade acetonitrile (Optima, A955-4) was from Fisher Scientific. Sequencing-grade trifluoroacetic acid (TFA) was from Burdick and Jackson (BB360P050). The sources of other reagents or materials have been noted in the text

The trypsin digests of Coomassie Blue-stained 2-D gel plugs were lyophilized dry. The dried digests were reconstituted in 10  $\mu$ L water and dried a second time to further reduce the amount of contaminating volatile buffer salts. On the day following the overnight drying, the samples were prepared for application to the MALDI target by one of two methods. EITHER Reconstitution Solvent A consisting of 700/270/30 (V/V/V)

acetonitrile/water/10% trifluoroacetic acid, was added to the sample, and only a portion of the sample was then mixed 1/1 (V/V) with the CHCA matrix solution, OR the entire sample was reconstituted in Solution B which was a 1/1 (V/V) mixture of Reconstitution Solvent A and CHCA matrix solution. The method used for each sample has been provided in the summary spreadsheets attached to this report. Portions (0.5-0.7  $\mu$ L) of the sample/matrix mixtures were applied to two different positions on the MALDI target (polished stainless steel target, ABI01-192-6-AB). Crystallization of the mixtures on the target proceeded under ambient conditions. The crystals were not washed. CHCA matrix solution was prepared at a concentration of 10 mg/mL in 600/370/30 (V/V/V) acetonitrile/water/10% TFA.

Spectra for the digests were acquired on an Applied Biosystems Inc. (now AB Sciex) 4700 MALDI TOF/TOF mass spectrometer with a 355 nm Nd:YAG laser (200-Hz) in the positive ion delayed-extraction reflector MS or positive ion MS/MS mode. (Instrument maintenance and installation of new laser and detector: 4/18-4/22/2016. Additional instrument maintenance and final tuning: 6/1-6/3/2016.) The MS spectra were acquired over the mass range 835-4500 Da. MS spectra were the result of 100 20-shot sub-spectra (first 2 shots of each sub-spectrum rejected). Laser settings have been noted in the Table below. An accelerating voltage of 20 kV combined with a 70% extraction grid voltage and an extraction delay time of 550 nsec (focus mass at 2000 Da), resulted in mass resolving powers of ~8000 at 900 Da, ~17000 at 2000 Da, and ~13000 at 3650 Da. The detector voltage multiplier (DVM) was varied as indicated for the different batches of samples. The digitizer settings included a bin size of 0.5 ns, a full-scale of 200 mV, and an input bandwidth of 500 MHz. The Global External (Default) Calibration and plate modeling were based on internally calibrated spectra for the Mass Spectrometer calibration solution (see below) spotted on at least 6 positions surrounding the sample spots on the target. Spectra were processed with Applied Biosystems' 4000 Series Explorer software (version 3.6).

| Spot Set Analysis Start Date | Batch Number | Samples                                        | MS Settings |      |               | MS/MS Settings |      |               |
|------------------------------|--------------|------------------------------------------------|-------------|------|---------------|----------------|------|---------------|
|                              |              |                                                | Laser       | DVM  | mV full-scale | Laser          | DVM  | mV full-scale |
| 5/19/2016                    | 1            | Digests of well-stained PUPA Samples           | 1700        | 0.9  | 200           | 2700 to 2900   | 0.97 | 100           |
| 5/24/2016                    | 2            | Digests of well-stained LARVA and MALE Samples | 2100        | 0.9  | 200           | 3500           | 0.97 | 100           |
| 5/26/2016                    | 3            | Digests of well-stained EGG Samples            | 2100        | 0.9  | 200           | 3500           | 0.97 | 100           |
| 6/10/2016                    | 4            | Digests of well-stained FEMALE Samples         | 2200        | 0.95 | 200           | 3500           | 1.0  | 200           |
| 6/14/2016                    | 5            | Digests of remaining poorly-stained Samples    | 2200        | 0.95 | 200           | 3500           | 1.0  | 200           |

The Mass Spectrometer calibration solution was prepared from stock solutions (prepared 6/19/2015) of peptides obtained from Sigma-Aldrich. The peptide concentrations shown in the table below were for the solutions actually applied to the target, that is, after mixing with CHCA matrix. The volume of the applied solution was 0.5-0.7  $\mu$ L. Comparison of the signal intensities for the sample peptides with those for the known amounts of the standards shown below may help in estimating the amounts of the sample peptides.

| Peptide                 | [M+H] <sup>+</sup> Monoisotopic (Da) | fmole Peptide/ $\mu$ L in Spotting Solution |
|-------------------------|--------------------------------------|---------------------------------------------|
| des-Arg1 Bradykinin     | 904.468                              | 100                                         |
| Angiotensin I           | 1296.685                             | 200                                         |
| [Glu1] Fibrinopeptide B | 1570.677                             | 130                                         |
| ACTH [1-17]             | 2093.087                             | 200                                         |
| ACTH [18-39]            | 2465.199                             | 150                                         |
| Neurotensin             | 1672.9175                            | 5                                           |
| ACTH [7-38]             | 3657.929                             | 1000                                        |

The 1-KV peptide unimolecular decomposition spectra, or MS/MS, were obtained without any CID gas and with metastable ion suppression. Resolution for ions in the MS/MS spectra was about 5000 at 1300 Da. The mass window for precursor ion selection was from 2.0 Da below the precursor ion mass to 3.0 Da above the precursor ion mass. MS/MS spectra were the result of at least 3500 (175 20-shot sub-spectra, no shots rejected). External mass calibration for the MS/MS was based on fragment ion masses from the peptide ACTH [18-39] ( $[M+H]^+$  2465.199 Da) in the Mass Spectrometer calibration solution spotted on at least 6 positions surrounding the sample spots on the target. MS/MS analyses for sample peptides were acquired for the 10 most intense ions (most intense first, minimum S/N 15 counts). Commonly observed contaminant ions and trypsin autolysis peptides in the sample digests were excluded from MS/MS analysis. Ions excluded from MS/MS analysis in the automated mode are listed in the table below.

| Spot Set Analysis Start Date | Batch Number | Samples                                        | MS Ions Excluded from MS/MS in Automated Acquisition Method (Interpretation Method)<br>Minimum S/N Filter was 15 for all analyses.                                                                                                                                                                                                                                                                                                  |
|------------------------------|--------------|------------------------------------------------|-------------------------------------------------------------------------------------------------------------------------------------------------------------------------------------------------------------------------------------------------------------------------------------------------------------------------------------------------------------------------------------------------------------------------------------|
| 5/19/2016                    | 1            | Digests of well-stained PUPA Samples           | 568.14, 795-895, 1045.564, 1794.8, 1826.8, 1940.935, 2211.105, 2225.12, 2283.181, 2284.19, 2299.18, 2300.18, 2807.315, 3337.758, 2501-4501<br>Na and K adducts or Oxidized forms ( $\pm 0.2$ Da)                                                                                                                                                                                                                                    |
| 5/24/2016                    | 2            | Digests of well-stained LARVA and MALE Samples | 568.14, 795-895, 1045.564, 1794.8, 1826.8, 1940.935, 2211.105, 2225.12, 2283.181, 2284.19, 2299.18, 2300.18, 2807.315, 3337.758, 2501-4501<br>Na and K adducts or Oxidized forms ( $\pm 0.2$ Da)                                                                                                                                                                                                                                    |
| 5/26/2016                    | 3            | Digests of well-stained EGG Samples            | <u>1<sup>st</sup> Analysis:</u><br>568.14, 795-895, 1045.564, 1794.8, 1826.8, 2211.105, 2225.12, 2283.181, 2284.19, 2299.18, 2300.18, 2807.315, 3337.758, 2501-4501 (the 1940.935 trypsin autolysis peptide mass was deleted from the exclusion list)<br>Na and K adducts or Oxidized forms ( $\pm 0.2$ Da)<br><u>2<sup>nd</sup> Analysis:</u><br>Ions < 2200 Da and >4500 Da<br>Na and K adducts or Oxidized forms ( $\pm 0.2$ Da) |
| 6/10/2016                    | 4            | Digests of well-stained FEMALE Samples         | 568.14, 1045.564, 1794.8, 1826.8, 1940.935, 2211.105, 2225.12, 2283.181, 2284.19, 2299.18, 2300.18, 2807.315, 3337.758, 2800-4500<br>Na and K adducts or Oxidized forms ( $\pm 0.2$ Da)                                                                                                                                                                                                                                             |
| 6/14/2016                    | 5            | Digests of remaining poorly-stained Samples    | 568.14, 1045.564, 1794.8, 1826.8, 2211.105, 2225.12, 2283.181, 2284.19, 2299.18, 2300.18, 2807.315, 3337.758, 2800-4500<br>Na and K adducts or Oxidized forms ( $\pm 0.2$ Da)                                                                                                                                                                                                                                                       |

Spectra were processed and batch analyzed in the “combined MS and MS/MS” mode with Applied Biosystems’ GPS Explorer software (vers. 3.6). Database searches were performed with Matrix Science’s Mascot search engine v. 2.4 ([www.matrixscience.com](http://www.matrixscience.com)) residing on the OLD in-house Mascot server. Searches were performed against the *Bactrocera latifrons* database downloaded from the NCBI database on February 24, 2016. The final search criteria were as indicated in the Work Summary section above. The source protein molecular weight was not limited in any of the searches. The mass error tolerance for precursor ions was  $\pm 200$  ppm. The mass error tolerance was  $\pm 0.2$  Da for MS/MS Fragment Ions. The commonly observed trypsin autolysis peptide masses were excluded (with a mass tolerance of 100 ppm) from the MS spectra peak lists (832.3, 842.51, 870.54, 1045.5642, 1826.6, 2211.1046, 2239.1359, 2283.1807, 2299.1756, 2807.31, 3337.758 Da). The signal/noise

(S/N) threshold was set to 20 for creating the peak lists from the MS spectra and to 10 for preparing the MS/MS spectra peak lists. A maximum of 500 ions could be selected from an MS spectrum for searching while the MS/MS peak lists were limited to 250 ions.

Shown below are the parameters utilized with Applied Biosystems' "Launch Peaks to Mascot" program to generate the MS and MS/MS peak lists in the "mgf" format. In this format the data also may be submitted by the Investigators directly to the Mascot "MS/MS Ion Search" program at the public website ([www.matrixscience.com](http://www.matrixscience.com)). Note that no ions were excluded from the mgf formatted MS data peak lists. The ".mgf" files have been saved in a folder on a flash drive for Dr. Chang.

| Parameters for exporting the spectrum data in the Mascot Generic Format (".mgf" files) |                                                                       |
|----------------------------------------------------------------------------------------|-----------------------------------------------------------------------|
| MS Data                                                                                | MS/MS Data                                                            |
| Input MS mass range: starting mass-4500 Da                                             | Input mass range: from 60 Da to 15 Da below mass of the precursor ion |
| No Ion Exclusion List                                                                  | No Ion Exclusion List                                                 |
| Peak Density: max 50 ions/200 Da                                                       | Peak Density: max 50 ions/200 Da                                      |
| Minimum S/N: 20                                                                        | Minimum S/N: 10                                                       |
| Minimum Area: 1000                                                                     | Minimum Area: 500                                                     |
| Maximum Number of Ions: 500                                                            | Maximum Number of Ions: 250                                           |

**Analyst's Signature/Date:**

/July 8, 2016

*Beverly DaGue*

**D. Stanley, C. Goodman, and Stella Chang, Received 05/12/16**  
**EGG SAMPLES FOR MASS SPEC ANALYSIS**

The dried digest samples were prepared for application to the MALDI target by one of two methods.

EITHER **Reconstitution Solvent A** consisting of 700/270/30 (V/V/V) acetonitrile/water/10% trifluoroacetic acid, was added to the sample, and only a portion of the sample was then mixed 1/1 (V/V) with the CHCA matrix solution, OR the entire sample was reconstituted in **Solution B** which was a 1/1 (V/V) mixture of Reconstitution Solvent A and CHCA matrix solution.

| Count | Spot ID     | Images | Score | Reconstitution Volume (µl) | Solvent | µl Sample in Solvent & mixed with equal Volume of CHCA | Analysis Batch # | Target Position | Database Search | 1ST ANALYSIS MALDI Well ID | Blast Search URL | NCM Insects | Search URL 1ST ANALYSIS | Target Position | Database Search | 2ND ANALYSIS MALDI Well ID | Blast Search URL | NCM Insects | Search URL 2ND ANALYSIS |
|-------|-------------|--------|-------|----------------------------|---------|--------------------------------------------------------|------------------|-----------------|-----------------|----------------------------|------------------|-------------|-------------------------|-----------------|-----------------|----------------------------|------------------|-------------|-------------------------|
| 1     | LAT E-ID104 | 1      | 4     | 8                          | A       | 1.5                                                    | 3                | B3              | 125487          | F20160528                  | FF020797         |             | E3                      |                 | 125559          | F20160531                  |                  |             |                         |
| 2     | LAT E-ID105 | 1      | 4     | 8                          | A       | 1.5                                                    | 3                | B5              | 125489          | F20160528                  | FF020799         |             | E5                      |                 | 125561          | F20160528                  |                  |             |                         |
| 3     | LAT E-ID112 | 1      | 2     | 2                          | B       |                                                        | 5                | E3              | 126359          | F20160614                  | FF021027         |             |                         |                 |                 |                            |                  |             |                         |
| 4     | LAT E-ID113 | 1      | 4     | 2                          | A       | 1                                                      | 3                | B7              | 125491          | F20160528                  | FF020801         |             | E7                      |                 | 125563          | F20160531                  |                  |             |                         |
| 5     | LAT E-ID116 | 1      | 4     | 2                          | A       | 1.5                                                    | 3                | B9              | 125493          | F20160528                  | FF020803         |             | E9                      |                 | 125565          | F20160531                  | F20160615        |             |                         |
| 6     | LAT E-ID121 | 1      | 4     | 4                          | A       | 1.5                                                    | 3                | B11             | 125495          | F20160528                  | FF020805         |             | E11                     |                 | 125567          | F20160531                  | FF021137         |             |                         |
| 7     | LAT E-ID128 | 1      | 4     | 4                          | A       | 1.5                                                    | 3                | B13             | 125497          | F20160528                  | FF020807         |             | E13                     |                 | 125569          | F20160531                  |                  |             |                         |
| 8     | LAT E-ID129 | 1      | 4     | 2                          | A       | 1                                                      | 3                | B15             | 125499          | F20160528                  | FF020809         |             | E15                     |                 | 125571          | F20160531                  |                  |             |                         |
| 9     | LAT E-ID157 | 1      | 1     | 2                          | B       |                                                        | 5                | E4              | 126360          | F20160614                  | FF021028         |             |                         |                 |                 |                            |                  |             |                         |
| 10    | LAT E-ID183 | 1      | 1     | 2                          | B       |                                                        | 5                | E5              | 126361          | F20160614                  | FF021029         |             |                         |                 |                 |                            |                  |             |                         |
| 11    | LAT E-ID252 | 1      | 4     | 3                          | A       | 1.5                                                    | 3                | B17             | 125501          | F20160528                  | FF020811         |             | E17                     |                 | 125573          | F20160531                  |                  |             |                         |
| 12    | LAT E-ID257 | 1      | 4     | 4                          | A       | 1.5                                                    | 3                | B19             | 125503          | F20160528                  | FF020813         |             | E19                     |                 | 125575          | F20160531                  |                  |             |                         |
| 13    | LAT E-ID267 | 1      | 4     | 8                          | A       | 1.5                                                    | 3                | B21             | 125505          | F20160528                  | FF020815         |             | E21                     |                 | 125577          | F20160531                  |                  |             |                         |
| 14    | LAT E-ID268 | 1      | 4     | 8                          | A       | 1.5                                                    | 3                | B2              | 125486          | F20160528                  | FF020796         |             | E2                      |                 | 125558          | F20160531                  |                  |             |                         |
| 15    | LAT E-ID276 | 1      | 4     | 8                          | A       | 1.5                                                    | 3                | B4              | 125488          | F20160528                  | FF020798         |             | E4                      |                 | 125560          | F20160531                  |                  |             |                         |
| 15    | LAT E-ID276 |        |       |                            |         |                                                        |                  |                 |                 |                            |                  |             | F10                     |                 | 125590          | F20160531                  |                  |             |                         |
| 16    | LAT E-ID277 | 1      | 4     | 4                          | A       | 1.5                                                    | 3                | B6              | 125490          | F20160528                  | FF020800         |             | E6                      |                 | 125562          | F20160531                  |                  |             |                         |
| 16    | LAT E-ID277 |        |       |                            |         |                                                        |                  |                 |                 |                            |                  |             | F12                     |                 | 125592          | F20160531                  |                  |             |                         |
| 17    | LAT E-ID281 | 1      | 4     | 4                          | A       | 1.5                                                    | 3                | B8              | 125492          | F20160528                  | FF020802         |             | E8                      |                 | 125564          | F20160531                  |                  |             |                         |
| 18    | LAT E-ID282 | 1      | 4     | 6                          | A       | 1.5                                                    | 3                | B10             | 125494          | F20160528                  | FF020804         |             | E10                     |                 | 125566          | F20160531                  | F20160615        |             |                         |
| 19    | LAT E-ID291 | 1      | 4     | 4                          | A       | 1.5                                                    | 3                | B12             | 125496          | F20160528                  | FF020806         |             | E12                     |                 | 125568          | F20160531                  | FF021139         |             |                         |
| 20    | LAT E-ID293 | 1      | 4     | 4                          | A       | 1.5                                                    | 3                | B14             | 125498          | F20160528                  | FF020808         |             | E14                     |                 | 125570          | F20160531                  |                  |             |                         |
|       |             |        |       |                            |         |                                                        |                  |                 |                 |                            |                  |             |                         |                 |                 |                            | FF020842         |             |                         |



D. Stanley, C. Goodman, and Stella Chang, Received 05/12/16  
EGG SAMPLES FOR MASS SPEC ANALYSIS

The dried digest samples were prepared for application to the MALDI target by one of two methods.

EITHER **Reconstitution Solvent A** consisting of 700/270/30 (V/V/V) acetonitrile/water/10% trifluoroacetic acid, was added to the sample, and only a portion of the sample was then mixed 1/1 (V/V) with the CHCA matrix solution, OR the entire sample was reconstituted in **Solution B** which was a 1/1 (V/V) mixture of Reconstitution Solvent A and CHCA matrix solution.

| Count | Spot ID     | Images | Score | Reconstitution Volume (µl) | Solvent | µl Sample in Solvent | Volume of CHCA | Analysis Batch # | Target Position | Database Search | 1ST ANALYSIS MALDI Well ID | 1ST ANALYSIS Blast Search URL | NCBI Insects Search URL | 1ST ANALYSIS Target Position | Database Search | 2ND ANALYSIS MALDI Well ID | 2ND ANALYSIS Blast Search URL | NCBI Insects Search URL | 2ND ANALYSIS Target Position |
|-------|-------------|--------|-------|----------------------------|---------|----------------------|----------------|------------------|-----------------|-----------------|----------------------------|-------------------------------|-------------------------|------------------------------|-----------------|----------------------------|-------------------------------|-------------------------|------------------------------|
| 21    | LAT E-ID307 | 1      | 4     | 6                          | A       | 1.5                  | 3              | B16              |                 | 125500          | F20160528                  |                               |                         | E16                          | 125572          | F20160531                  |                               |                         |                              |
| 22    | LAT E-ID308 | 1      | 4     | 2                          | A       | 1.5                  | 3              | B18              |                 | 125502          | F20160528                  |                               |                         | E18                          | 125574          | F20160531                  |                               |                         |                              |
| 23    | LAT E-ID312 | 1      | 4     | 4                          | A       | 1.5                  | 3              | B20              |                 | 125504          | F20160528                  |                               |                         | E20                          | 125576          | F20160531                  |                               |                         |                              |
| 24    | LAT E-ID313 | 1      | 4     | 4                          | A       | 1.5                  | 3              | B22              |                 | 125506          | F20160528                  |                               |                         | E22                          | 125578          | F20160531                  |                               |                         |                              |
| 25    | LAT E-ID316 | 1      | 4     | 8                          | A       | 1.5                  | 3              | C3               |                 | 125511          | F20160528                  |                               |                         | F3                           | 125583          | F20160531                  |                               |                         |                              |
| 26    | LAT E-ID317 | 1      | 4     | 4                          | A       | 1.5                  | 3              | C5               |                 | 125513          | F20160528                  |                               |                         | F5                           | 125585          | F20160531                  |                               |                         |                              |
| 27    | LAT E-ID322 | 1      | 4     | 3                          | A       | 1.5                  | 3              | C7               |                 | 125515          | F20160528                  |                               |                         | F7                           | 125587          | F20160531                  |                               |                         |                              |
| 28    | LAT E-ID326 | 1      | 4     | 6                          | A       | 1.5                  | 3              | C9               |                 | 125517          | F20160528                  |                               |                         | F9                           | 125589          | F20160531                  |                               |                         |                              |
| 29    | LAT E-ID327 | 1      | 4     | 4                          | A       | 1.5                  | 3              | C11              |                 | 125519          | F20160528                  |                               |                         | F11                          | 125591          | F20160531                  |                               |                         |                              |
| 30    | LAT E-ID366 | 1      | 4     | 3                          | A       | 1.5                  | 3              | C13              |                 | 125521          | F20160528                  |                               |                         | F13                          | 125593          | F20160531                  |                               |                         |                              |
| 31    | LAT E-ID564 | 1      | 4     | 8                          | A       | 1.5                  | 3              | C15              |                 | 125523          | F20160528                  |                               |                         | F17                          | 125597          | F20160531                  |                               |                         |                              |
| 32    | LAT E-ID628 | 1      | 4     | 3                          | A       | 1.5                  | 3              | C17              |                 | 125525          | F20160528                  |                               |                         | F19                          | 125599          | F20160531                  |                               |                         |                              |
| 33    | LAT E-ID633 | 1      | 4     | 12                         | A       | 1.5                  | 3              | C19              |                 | 125527          | F20160528                  |                               |                         | F21                          | 125601          | F20160531                  |                               |                         |                              |
| 34    | LAT E-ID640 | 1      | 4     | 3                          | A       | 1.5                  | 3              | C21              |                 | 125529          | F20160528                  |                               |                         | F23                          | 125603          | F20160531                  |                               |                         |                              |
| 35    | LAT E-ID643 | 1      | 3     | 2                          | A       | 1                    | 5              | E6               |                 | 126362          | F20160614                  | F20160615<br>FF021091         |                         |                              |                 |                            |                               |                         |                              |
| 36    | LAT E-ID646 | 1      | 4     | 8                          | A       | 1.5                  | 3              | C2               |                 | 125510          | F20160528                  |                               |                         | F2                           | 125582          | F20160531                  |                               |                         |                              |
| 37    | LAT E-ID650 | 1      | 4     | 10                         | A       | 1.5                  | 3              | C4               |                 | 125512          | F20160528                  |                               |                         | F4                           | 125584          | F20160531                  |                               |                         | F20160615                    |
| 38    | LAT E-ID685 | 1      | 3     | 3                          | A       | 1.5                  | 3              | C6               |                 | 125514          | F20160528                  |                               |                         | F6                           | 125586          | F20160531                  |                               |                         | FF021169                     |
| 39    | LAT E-ID98  | 1      | 4     | 4                          | A       | 1.5                  | 3              | C8               |                 | 125516          | F20160528                  |                               |                         | F8                           | 125588          | F20160531                  |                               |                         |                              |
|       |             |        |       |                            |         |                      |                |                  |                 | FF020823        |                            |                               |                         |                              |                 | FF020857                   |                               |                         |                              |

D. Stanley, C. Goodman, and Stella Chang, Received 05/12/16  
LARVA SAMPLES FOR MASS SPEC ANALYSIS

The dried digest samples were prepared for application to the MALDI target by one of two methods.

EITHER **Reconstitution Solvent A** consisting of 700/270/30 (V/V/V) acetonitrile/water/10% trifluoroacetic acid, was added to the sample, and only a portion of the sample was then mixed 1/1 (V/V) with the CHCA matrix solution, OR the entire sample was reconstituted in **Solvent B** which was a 1/1 (V/V) mixture of Reconstitution Solvent A and CHCA matrix solution.

| Count | Spot ID    | Images | Score | Reconstitution Volume (µL) | Solvent | All Sample in Solvent A | equal Volume mixed with Solvent A | # of QC Analysis Batch | Target Position | Database  | Search MALDI | Well ID, 1ST ANALYSIS | 1ST ANALYSIS | NCM Insects | Search URL 1ST ANALYSIS | Target Position | Database | Search MALDI | Well ID, 2ND ANALYSIS | 2ND ANALYSIS | NCM Insects | Search URL 2ND ANALYSIS |
|-------|------------|--------|-------|----------------------------|---------|-------------------------|-----------------------------------|------------------------|-----------------|-----------|--------------|-----------------------|--------------|-------------|-------------------------|-----------------|----------|--------------|-----------------------|--------------|-------------|-------------------------|
| 1     | LAT L-130  | 2      | 4     | 3                          | A       | 1.5                     | 2                                 | E2                     | 125360          | F20160528 | FF020767     | F20160614             | FF021031     | F20160615   | FF021092                |                 |          |              |                       |              |             |                         |
| 2     | LAT L-136  | 2      | 2     | 2                          | B       |                         | 5                                 | E7                     | 126363          | F20160614 | FF021031     | F20160615             | FF021092     |             |                         |                 |          |              |                       |              |             |                         |
| 3     | LAT L-372  | 2      | 4     | 3                          | A       | 1.5                     | 2                                 | E4                     | 125362          | F20160528 | FF020768     | F20160528             |              |             |                         |                 |          |              |                       |              |             |                         |
| 4     | LAT L-379  | 2      | 4     | 3                          | A       | 1.5                     | 2                                 | E6                     | 125364          | F20160528 | FF020769     | F20160528             |              |             |                         |                 |          |              |                       |              |             |                         |
| 5     | LAT L-395  | 2      | 4     | 4                          | A       | 1.5                     | 2                                 | E8                     | 125366          | F20160528 | FF020770     | F20160528             |              |             |                         |                 |          |              |                       |              |             |                         |
| 6     | LAT L-401  | 2      | 1     | 2                          | B       |                         | 5                                 | E8                     | 126364          | F20160614 | FF021032     | F20160614             | FF021093     |             |                         |                 |          |              |                       |              |             |                         |
| 7     | LAT L-407  | 2      | 2     | 2                          | A       | 1                       | 2                                 | E10                    | 125368          | F20160528 | FF020771     | F20160528             |              |             |                         |                 |          |              |                       |              |             |                         |
| 8     | LAT L-416  | 2      | 1     | 2                          | B       |                         | 5                                 | E9                     | 126365          | F20160614 | FF021033     | F20160614             | FF021094     |             |                         |                 |          |              |                       |              |             |                         |
| 9     | LAT L-419  | 2      | 4     | 4                          | A       | 1.5                     | 2                                 | E12                    | 125370          | F20160528 | FF020772     | F20160528             |              |             |                         |                 |          |              |                       |              |             |                         |
| 10    | LAT L-426  | 2      | 1     | 2                          | B       |                         | 5                                 | E10                    | 126366          | F20160614 | FF021034     | F20160614             | FF021096     |             |                         |                 |          |              |                       |              |             |                         |
| 11    | LAT L-454  | 2      | 2     | 2                          | B       |                         | 2                                 | E14                    | 125372          | F20160528 | FF020773     | F20160528             |              |             |                         |                 |          |              |                       |              |             |                         |
| 12    | LAT L-485  | 2      | 2     | 2                          | B       |                         | 2                                 | E16                    | 125374          | F20160528 | FF020774     | F20160528             |              |             |                         |                 |          |              |                       |              |             |                         |
| 13    | LAT L-551  | 2      | 4     | 2                          | A       | 1                       | 2                                 | E18                    | 125376          | F20160528 | FF020775     | F20160528             |              |             |                         |                 |          |              |                       |              |             |                         |
| 14    | LAT L-566  | 2      | 1     | 2                          | B       |                         | 2                                 | E20                    | 125378          | F20160528 | FF020776     | F20160528             |              |             |                         |                 |          |              |                       |              |             |                         |
| 15    | LAT L-571  | 2      | 1     | 2                          | B       |                         | 2                                 | E22                    | 125380          | F20160528 | FF020777     | F20160528             |              |             |                         |                 |          |              |                       |              |             |                         |
| 16    | LAT L-59   | 2      | 4     | 3                          | A       | 1.5                     | 2                                 | F3                     | 125385          | F20160528 | FF020778     | F20160528             |              |             |                         |                 |          |              |                       |              |             |                         |
| 17    | LAT L-674  | 2      | 1     | 2                          | B       |                         | 5                                 | E11                    | 126367          | F20160614 | FF021035     | F20160614             | FF021099     |             |                         |                 |          |              |                       |              |             |                         |
| 18    | LAT L-679  | 2      | 2     | 2                          | A       | 1                       | 2                                 | F5                     | 125387          | F20160528 | FF020779     | F20160528             |              |             |                         |                 |          |              |                       |              |             |                         |
| 19    | LAT L-708  | 2      | 4     | 3                          | A       | 1.5                     | 2                                 | F7                     | 125389          | F20160528 | FF020780     | F20160528             |              |             |                         |                 |          |              |                       |              |             |                         |
| 20    | LAT L-710  | 2      | 3     | 2                          | A       | 1                       | 2                                 | F9                     | 125391          | F20160528 | FF020781     | F20160528             |              |             |                         |                 |          |              |                       |              |             |                         |
| 21    | LAT L-721  | 2      | 1     | 2                          | B       |                         | 5                                 | E12                    | 126368          | F20160614 | FF021036     | F20160614             | FF021101     |             |                         |                 |          |              |                       |              |             |                         |
| 22    | LAT L-739  | 2      | 4     | 3                          | A       | 1.5                     | 2                                 | F11                    | 125393          | F20160528 | FF020782     | F20160528             |              |             |                         |                 |          |              |                       |              |             |                         |
| 23    | LAT L-2001 | 3      | 4     | 2                          | A       | 1                       | 2                                 | F13                    | 125395          | F20160528 | FF020783     | F20160528             |              |             |                         |                 |          |              |                       |              |             |                         |

D. Stanley, C. Goodman, and Stella Chang, Received 05/12/16  
LARVA SAMPLES FOR MASS SPEC ANALYSIS

The dried digest samples were prepared for application to the MALDI target by one of two methods.  
EITHER **Reconstitution Solvent A** consisting of 700/270/30 (V/V/V) acetonitrile/water/10% trifluoroacetic acid, was added to the sample, and only a portion of the sample was then mixed 1/1 (V/V) with the CHCA matrix solution,  
OR the entire sample was reconstituted in **Solvent B** which was a 1/1 (V/V) mixture of Reconstitution Solvent A and CHCA matrix solution.

| Count | Spot ID    | Images | Score | Reconstitution Volume (µL) | Solvent | µL Sample in Solvent | µL Sample mixed with equal Volume of CHCA matrix | Target Position # | Database 1ST ANALYSIS | Well ID, 1ST ANALYSIS | Blot Search URL 1ST ANALYSIS | NCI# Insects | Search URL 1ST ANALYSIS | Target Position 2ND ANALYSIS | Database 2ND ANALYSIS | Well ID, 2ND ANALYSIS | Blot Search URL 2ND ANALYSIS | NCI# Insects | Search URL 2ND ANALYSIS |
|-------|------------|--------|-------|----------------------------|---------|----------------------|--------------------------------------------------|-------------------|-----------------------|-----------------------|------------------------------|--------------|-------------------------|------------------------------|-----------------------|-----------------------|------------------------------|--------------|-------------------------|
| 24    | LAT L-2120 | 3      | 4     | 3                          | A       | 1.5                  | 2                                                | F15               | 125397 F20160528      | FF020784              |                              |              |                         |                              |                       |                       |                              |              |                         |
| 25    | LAT L-2187 | 3      | 4     | 6                          | A       | 1.5                  | 2                                                | F17               | 125399 F20160528      | FF020785              |                              |              |                         |                              |                       |                       |                              |              |                         |
| 26    | LAT L-2367 | 3      | 1     | 2                          | B       |                      | 5                                                | E13               | 126369 F20160614      | FF021037              | F20160615                    |              |                         |                              |                       |                       |                              |              |                         |
| 27    | LAT L-2483 | 3      | 3     | 4                          | A       | 1.5                  | 2                                                | F19               | 125401 F20160528      | FF020786              | F20160626                    |              |                         |                              |                       |                       |                              |              |                         |
| 28    | LAT L-2487 | 3      | 4     | 2                          | A       | 1                    | 2                                                | F21               | 125403 F20160528      | FF020787              | F20160626                    |              |                         |                              |                       |                       |                              |              |                         |
| 29    | LAT L-2496 | 3      | 4     | 3                          | A       | 1.5                  | 2                                                | F23               | 125405 F20160528      | FF020788              |                              |              |                         |                              |                       |                       |                              |              |                         |
| 30    | LAT L-2569 | 3      | 4     | 3                          | A       | 1.5                  | 2                                                | G3                | 125409 F20160528      | FF020789              |                              |              | D3                      |                              | 125337 F20160528      | FF020766              |                              |              |                         |
| 31    | LAT L-2590 | 3      | 1     | 2                          | B       |                      | 5                                                | E14               | 126370 F20160614      | FF021038              | F20160615                    |              |                         |                              |                       |                       |                              |              |                         |
| 32    | LAT L-2634 | 3      | 4     | 4                          | A       | 1.5                  | 2                                                | G5                | 125411 F20160528      | FF020790              | FF021104                     |              |                         |                              |                       |                       |                              |              |                         |
| 33    | LAT L-2652 | 3      | 2     | 2                          | B       |                      | 5                                                | E15               | 126371 F20160614      | FF021039              | F20160615                    |              |                         |                              |                       |                       |                              |              |                         |



D. Stanley, C. Goodman, and Stella Chang, Received 05/12/16  
PUPA SAMPLES FOR MASS SPEC ANALYSIS

The dried digest samples were prepared for application to the MALDI target by one of two methods.  
EITHER **Reconstitution Solvent A** consisting of 700/270/30 (V/V/V) acetonitrile/water/10% trifluoroacetic acid, was added to the sample, and only a portion of the sample was then mixed 1/1 (V/V) with the CHCA matrix solution,  
OR the entire sample was reconstituted in **Solvent B** which was a 1/1 (V/V) mixture of Reconstitution Solvent A and CHCA matrix solution.

| Count | Spot ID      | Images | Score | Reconstitution Volume (µl) | Reconstitution Solvent | µl Sample in Solvent A mixed with equal Volume of CHCA | Analysis Batch # | Target Position 1ST ANALYSIS | Database Search MALDI ANALYSIS | Well ID, 1ST ANALYSIS | NCM Insects Search URL ANALYSIS | Target Position 2ND ANALYSIS | Database Search MALDI ANALYSIS | Well ID, 2ND ANALYSIS | Blat Search URL 2ND ANALYSIS | NCM Insects Search URL ANALYSIS |
|-------|--------------|--------|-------|----------------------------|------------------------|--------------------------------------------------------|------------------|------------------------------|--------------------------------|-----------------------|---------------------------------|------------------------------|--------------------------------|-----------------------|------------------------------|---------------------------------|
| 1     | LAT P-ID2070 | 4      | 4     | 8                          | A                      | 2                                                      | 1                | B4                           | 124894                         | F20160520             | F20160622                       |                              |                                |                       |                              |                                 |
| 2     | LAT P-ID2074 | 4      | 1     | 2                          | B                      |                                                        | 5                | E16                          | 126372                         | F20160614             | F20160615                       |                              |                                |                       |                              |                                 |
| 3     | LAT P-ID2262 | 4      | 4     | 4                          | A                      | 2                                                      | 1                | B6                           | 124896                         | F20160520             |                                 |                              |                                |                       |                              |                                 |
| 4     | LAT P-ID2304 | 4      | 2     | 2                          | A                      | 1                                                      | 1                | B8                           | 124898                         | F20160520             | F20160622                       |                              |                                |                       |                              |                                 |
| 5     | LAT P-ID2305 | 4      | 4     | 4                          | A                      | 2                                                      | 1                | B12                          | 124902                         | F20160520             | F20160622                       |                              |                                |                       |                              |                                 |
| 6     | LAT P-ID2322 | 4      | 4     | 4                          | A                      | 2                                                      | 1                | B10                          | 124900                         | F20160520             |                                 |                              |                                |                       |                              |                                 |
| 7     | LAT P-ID2435 | 4      | 4     | 4                          | A                      | 2                                                      | 1                | B16                          | 124906                         | F20160520             |                                 |                              |                                |                       |                              |                                 |
| 8     | LAT P-ID2436 | 4      | 4     | 4                          | A                      | 2                                                      | 1                | B14                          | 124904                         | F20160520             |                                 |                              |                                |                       |                              |                                 |
| 9     | LAT P-ID2466 | 4      | 3     | 2                          | B                      |                                                        | 5                | E17                          | 126373                         | F20160614             | F20160615                       |                              |                                |                       |                              |                                 |
| 10    | LAT P-ID2558 | 4      | 1     | 2                          | B                      |                                                        | 5                | E18                          | 126374                         | F20160614             | F20160615                       |                              |                                |                       |                              |                                 |
| 11    | LAT P-ID211  | 5      | 1     | 2                          | B                      |                                                        | 5                | E19                          | 126375                         | F20160614             | F20160615                       |                              |                                |                       |                              |                                 |
| 12    | LAT P-ID500  | 5      | 4     | 4                          | A                      | 2                                                      | 1                | B18                          | 124908                         | F20160520             | F20160622                       | 817                          | 124907                         | F20160520             | F20160622                    |                                 |
| 13    | LAT P-ID519  | 5      | 4     | 2                          | A                      | 1                                                      | 1                | B24                          | 124914                         | F20160520             | F20160622                       | 823                          | 124913                         | F20160520             | FF021291                     |                                 |
| 14    | LAT P-ID1511 | 5      | 4     | 8                          | A                      | 2                                                      | 1                | B20                          | 124910                         | F20160520             | F20160622                       |                              |                                | FF020671              |                              |                                 |
| 15    | LAT P-ID1654 | 5      | 4     | 2                          | A                      | 1                                                      | 1                | B22                          | 124912                         | F20160520             | F20160622                       | 821                          | 124911                         | F20160520             | F20160622                    |                                 |
|       |              |        |       |                            |                        |                                                        |                  |                              |                                | FF020669              | FF021295                        |                              |                                | FF020668              | FF021294                     |                                 |



**D. Stanley, C. Goodman, and Stella Chang, Received 05/12/16**  
**MALE SAMPLES FOR MASS SPEC ANALYSIS**

The dried digest samples were prepared for application to the MALDI target by one of two methods.  
 EITHER **Reconstitution Solvent A** consisting of 700/270/30 (V/V/V) acetonitrile/water/10% trifluoroacetic acid, was added to the sample, and only a portion of the sample was then mixed 1/1 (V/V) with the CHCA matrix solution,  
 OR the entire sample was reconstituted in **Solution B** which was a 1/1 (V/V) mixture of Reconstitution Solvent A and CHCA matrix solution.

| Count | Spot ID      | Images | Score | Reconstitution Volume (µL) | Reconstitution Solvent | µL Sample in Solvent | A mixed with equal Volume of CHCA | Analyst Batch # | Target Position 1ST | Database Search 1ST | ANALYSIS  | MALDI Well I.D. 1ST | Blat Search URL 1ST | NCI/Insects Search URL 1ST | ANALYSIS | Target Position 2ND | Database Search 2ND | MALDI Well I.D. 2ND | Blat Search URL 2ND | ANALYSIS | NCI/Insects Search URL 2ND |
|-------|--------------|--------|-------|----------------------------|------------------------|----------------------|-----------------------------------|-----------------|---------------------|---------------------|-----------|---------------------|---------------------|----------------------------|----------|---------------------|---------------------|---------------------|---------------------|----------|----------------------------|
| 1     | LAT M-ID1251 | 6      | 4     | 2                          | A                      | 1                    | 2                                 | G7              |                     | 125413              | F20160528 | FF020791            |                     |                            |          |                     |                     |                     |                     |          |                            |
| 2     | LAT M-ID1261 | 6      | 4     | 4                          | A                      | 1.5                  | 2                                 | G9              |                     | 125415              | F20160528 | FF020792            |                     |                            |          |                     |                     |                     |                     |          |                            |
| 3     | LAT M-ID1288 | 6      | 1     | 2                          | B                      |                      | 5                                 | E20             |                     | 126376              | F20160614 | FF021044            | F20160615           |                            |          |                     |                     |                     |                     |          |                            |
| 4     | LAT M-ID1344 | 6      | 1     | 2                          | B                      |                      | 5                                 | E21             |                     | 126377              | F20160614 | FF021045            | F20160615           |                            |          |                     |                     |                     |                     |          |                            |
| 5     | LAT M-ID1535 | 6      | 4     | 4                          | A                      | 1.5                  | 2                                 | G11             |                     | 125417              | F20160528 | FF021331            | F20160626           |                            |          |                     |                     |                     |                     |          |                            |
| 6     | LAT M-ID1617 | 6      | 1     | 2                          | B                      |                      | 5                                 | E22             |                     | 126378              | F20160614 | FF021046            | F20160615           |                            |          |                     |                     |                     |                     |          |                            |
| 7     | LAT M-ID1475 | 7      | 4     | 4                          | A                      | 1.5                  | 2                                 | G13             |                     | 125419              | F20160528 | FF020794            | F20160626           |                            |          |                     |                     |                     |                     |          |                            |
| 8     | LAT M-ID1561 | 7      | 4     | 4                          | A                      | 1.5                  | 2                                 | G15             |                     | 125421              | F20160528 | FF020795            | F20160626           |                            |          |                     |                     |                     |                     |          |                            |

D. Stanley, C. Goodman, and Stella Chang, Received 05/12/16  
FEMALE SAMPLES FOR MASS SPEC ANALYSIS

The dried digest samples were prepared for application to the MALDI target by one of two methods.  
EITHER **Reconstitution Solvent A** consisting of 700/270/30 (V/V/V) acetonitrile/water/10% trifluoroacetic acid, was added to the sample, and only a portion of the sample was then mixed 1/1 (V/V) with the CHCA matrix solution,  
OR the entire sample was reconstituted in **Solution B** which was a 1/1 (V/V) mixture of Reconstitution Solvent A and CHCA matrix solution.

| Count | Spot ID      | Images | Score | Reconstitution Volume (µL) | Reconstitution Solvent | µL Sample in Solvent | A mixed with equal Volume of CHCA | Analysis Batch # | Target Position 1ST ANALYSIS | MALDI Well 1ST ANALYSIS | Blat Search URL 1ST ANALYSIS | NCMIR Insects ANALYSIS | Search URL 1ST ANALYSIS | Target Position 2ND ANALYSIS | Database Search 2ND ANALYSIS | MALDI Well 1D 2ND ANALYSIS | Blat Search URL 2ND ANALYSIS | NCMIR Insects ANALYSIS | Search URL 2ND ANALYSIS |
|-------|--------------|--------|-------|----------------------------|------------------------|----------------------|-----------------------------------|------------------|------------------------------|-------------------------|------------------------------|------------------------|-------------------------|------------------------------|------------------------------|----------------------------|------------------------------|------------------------|-------------------------|
| 1     | LAT F-ID223  | 8      | 4     | 4                          | A                      | 1.5                  | 4                                 | E5               |                              | 126163                  | F20160610                    |                        |                         |                              |                              |                            |                              |                        |                         |
| 2     | LAT F-ID226  | 8      | 3     | 2                          | A                      | 1                    | 4                                 | E6               |                              | 126164                  | F20160610                    |                        |                         |                              |                              |                            |                              |                        |                         |
| 3     | LAT F-ID299  | 8      | 4     | 4                          | A                      | 1.5                  | 4                                 | E7               |                              | 126165                  | F20160610                    |                        |                         |                              |                              |                            |                              |                        |                         |
| 4     | LAT F-ID363  | 8      | 1     | 2                          | B                      |                      | 4                                 | E8               |                              | 126166                  | F20160610                    |                        |                         |                              |                              |                            |                              |                        |                         |
| 5     | LAT F-ID403  | 8      | 4     | 4                          | A                      | 1.5                  | 4                                 | E9               |                              | 126167                  | F20160610                    |                        |                         |                              |                              |                            |                              |                        |                         |
| 6     | LAT F-ID533  | 8      | 4     | 4                          | A                      | 1.5                  | 4                                 | E10              |                              | 126168                  | F20160610                    | F20160615              |                         |                              |                              |                            |                              |                        |                         |
| 7     | LAT F-ID541  | 8      | 4     | 4                          | A                      | 1.5                  | 4                                 | E11              |                              | 126169                  | F20160610                    | FF021105               |                         |                              |                              |                            |                              |                        |                         |
| 8     | LAT F-ID548  | 8      | 3     | 3                          | A                      | 1.5                  | 4                                 | E12              |                              | 126170                  | F20160610                    |                        |                         |                              |                              |                            |                              |                        |                         |
| 9     | LAT F-ID625  | 8      | 1     | 2                          | B                      |                      | 4                                 | E13              |                              | 126171                  | F20160610                    | F20160615              |                         |                              |                              |                            |                              |                        |                         |
| 10    | LAT F-ID654  | 8      | 1     | 2                          | B                      |                      | 4                                 | E14              |                              | 126172                  | F20160610                    | FF021111               |                         |                              |                              |                            |                              |                        |                         |
| 11    | LAT F-ID779  | 8      | 3     | 3                          | A                      | 1.5                  | 4                                 | E15              |                              | 126173                  | F20160610                    |                        | 815                     |                              | 126101                       | F20160610                  |                              |                        |                         |
| 12    | LAT F-ID1051 | 9      | 1     | 2                          | B                      |                      | 4                                 | E16              |                              | 126174                  | F20160610                    |                        |                         |                              |                              | FF021020                   |                              |                        |                         |
| 13    | LAT F-ID1253 | 9      | 4     | 2                          | A                      | 1                    | 4                                 | E17              |                              | 126175                  | F20160610                    |                        |                         |                              |                              |                            |                              |                        |                         |
| 14    | LAT F-ID903  | 9      | 1     | 2                          | B                      |                      | 4                                 | E18              |                              | 126176                  | F20160610                    |                        |                         |                              |                              |                            |                              |                        |                         |
| 15    | LAT F-ID911  | 9      | 4     | 2                          | A                      | 1                    | 4                                 | E19              |                              | 126177                  | F20160610                    |                        |                         |                              |                              |                            |                              |                        |                         |
| 16    | LAT F-ID972  | 9      | 4     | 3                          | A                      | 1.5                  | 4                                 | E20              |                              | 126178                  | F20160610                    | F20160615              |                         |                              |                              |                            |                              |                        |                         |
| 17    | LAT F-ID978  | 9      | 3     | 2                          | A                      | 1                    | 4                                 | E21              |                              | 126179                  | F20160610                    | FF021124               |                         |                              |                              |                            |                              |                        |                         |
|       |              |        |       |                            |                        |                      |                                   |                  |                              |                         | FF021001                     | F20160615              |                         |                              |                              |                            |                              |                        |                         |
|       |              |        |       |                            |                        |                      |                                   |                  |                              |                         | FF021002                     | FF021125               |                         |                              |                              |                            |                              |                        |                         |

Charles W. Gehrke Proteomics Center  
Research Core Facilities  
University of Missouri-Columbia

212 Life Sciences Center  
1201 East Rollins Road  
Columbia, MO 65211

### REQUEST FOR MASS SPECTRAL ANALYSIS

Name: Cindy Goodman/Stella Chang Phone: 573-876-8303  
Email: goodmanc@missouri.edu Date: 5/12/2016  
Campus address: 1503 S. Providence Rd PI or Authorized Signature:  
PI: David Stanley  
MoCode: DN778 Dept: USDA, ARS, BCIRL



#### Sample information

Sample type: Trypsin digests of 2D Gel spots  
Source: Solanum fruit fly (*Bactrocera latifrons*) - eggs, larvae, pupae, adults  
Further Information:

PTM:

Amount:

Purity:

Mol Wt/pl

Detection method:

Prior treatment: Trypsin digest (as previously described)

Other modifications?

Toxicity:

Stability:

Objectives of analyses or other comments:

To determine protein identities..

#### Sample designation:

1) See sample list

2)

3)

4)

5)

6)

#### TYPE OF ANALYSIS REQUESTED

Number

Comments

Manual or robotic gel excision (hours)

In-gel digestion - 1D gel band(s)

In-gel digestion - 2D gel spot(s)

In-gel digestion - 96 well plates (2D spots)

Solution digest

ZIP tip peptide clean-up and concentration

MALDI-TOF MS

Automated MALDI-TOF MS

4700 MALDI TOF-TOF MS & MS/MS

112

Automated 4700 MALDI TOF-TOF

Nanospray(ionspray) QqTOF MS

Nanospray(ionspray) QqTOF MS/MS

Data analysis (*de novo* sequencing etc.)

LTQ Orbitrap or 6520 QTOF LC-MS

LTQ Orbitrap or 6520 QTOF LC-MS/MS

Analytical-scale HPLC

**Notes:**

**All samples were treated with 3 plugs except for LAT P-ID2466 and LAT F-ID625 which were both treated with 2 plugs**

**All samples treated using Trypsin Gold-Mass Spec Grade V5280**



**EGG SAMPLES FOR MASS SPEC ANALYSIS 05/10/16 Stella Chang**

| Count | Spot ID     | Images | Score |
|-------|-------------|--------|-------|
| 1     | LAT E-ID104 | 1      | 4     |
| 2     | LAT E-ID105 | 1      | 4     |
| 3     | LAT E-ID112 | 1      | 2     |
| 4     | LAT E-ID113 | 1      | 4     |
| 5     | LAT E-ID116 | 1      | 4     |
| 6     | LAT E-ID121 | 1      | 4     |
| 7     | LAT E-ID128 | 1      | 4     |
| 8     | LAT E-ID129 | 1      | 4     |
| 9     | LAT E-ID157 | 1      | 1     |
| 10    | LAT E-ID183 | 1      | 1     |
| 11    | LAT E-ID252 | 1      | 4     |
| 12    | LAT E-ID257 | 1      | 4     |
| 13    | LAT E-ID267 | 1      | 4     |
| 14    | LAT E-ID268 | 1      | 4     |
| 15    | LAT E-ID276 | 1      | 4     |
| 16    | LAT E-ID277 | 1      | 4     |
| 17    | LAT E-ID281 | 1      | 4     |
| 18    | LAT E-ID282 | 1      | 4     |
| 19    | LAT E-ID291 | 1      | 4     |
| 20    | LAT E-ID293 | 1      | 4     |
| 21    | LAT E-ID307 | 1      | 4     |
| 22    | LAT E-ID308 | 1      | 4     |
| 23    | LAT E-ID312 | 1      | 4     |
| 24    | LAT E-ID313 | 1      | 4     |
| 25    | LAT E-ID316 | 1      | 4     |
| 26    | LAT E-ID317 | 1      | 4     |
| 27    | LAT E-ID322 | 1      | 4     |
| 28    | LAT E-ID326 | 1      | 4     |
| 29    | LAT E-ID327 | 1      | 4     |
| 30    | LAT E-ID366 | 1      | 4     |
| 31    | LAT E-ID564 | 1      | 4     |
| 32    | LAT E-ID628 | 1      | 4     |
| 33    | LAT E-ID633 | 1      | 4     |
| 34    | LAT E-ID640 | 1      | 4     |
| 35    | LAT E-ID643 | 1      | 3     |
| 36    | LAT E-ID646 | 1      | 4     |
| 37    | LAT E-ID650 | 1      | 4     |
| 38    | LAT E-ID685 | 1      | 3     |
| 39    | LAT E-ID98  | 1      | 4     |

**LARVA SAMPLES FOR MASS SPEC ANALYSIS 05/10/16 Stella Chang**

| Count | Spot ID      | Images | Score |
|-------|--------------|--------|-------|
| 1     | LAT L-ID130  | 2      | 4     |
| 2     | LAT L-ID136  | 2      | 2     |
| 3     | LAT L-ID372  | 2      | 4     |
| 4     | LAT L-ID379  | 2      | 4     |
| 5     | LAT L-ID395  | 2      | 4     |
| 6     | LAT L-ID401  | 2      | 1     |
| 7     | LAT L-ID407  | 2      | 2     |
| 8     | LAT L-ID416  | 2      | 1     |
| 9     | LAT L-ID419  | 2      | 4     |
| 10    | LAT L-ID426  | 2      | 1     |
| 11    | LAT L-ID454  | 2      | 2     |
| 12    | LAT L-ID485  | 2      | 2     |
| 13    | LAT L-ID551  | 2      | 4     |
| 14    | LAT L-ID566  | 2      | 1     |
| 15    | LAT L-ID571  | 2      | 1     |
| 16    | LAT L-ID59   | 2      | 4     |
| 17    | LAT L-ID674  | 2      | 1     |
| 18    | LAT L-ID679  | 2      | 2     |
| 19    | LAT L-ID708  | 2      | 4     |
| 20    | LAT L-ID710  | 2      | 3     |
| 21    | LAT L-ID721  | 2      | 1     |
| 22    | LAT L-ID739  | 2      | 4     |
| 23    | LAT L-ID2001 | 3      | 4     |
| 24    | LAT L-ID2120 | 3      | 4     |
| 25    | LAT L-ID2187 | 3      | 4     |
| 26    | LAT L-ID2367 | 3      | 1     |
| 27    | LAT L-ID2483 | 3      | 3     |
| 28    | LAT L-ID2487 | 3      | 4     |
| 29    | LAT L-ID2496 | 3      | 4     |
| 30    | LAT L-ID2569 | 3      | 4     |
| 31    | LAT L-ID2590 | 3      | 1     |
| 32    | LAT L-ID2634 | 3      | 4     |
| 33    | LAT L-ID2652 | 3      | 2     |

**PUPA SAMPLES FOR MASS SPEC ANALYSIS 05/10/16 Stella Chang**

| Count | Spot ID      | Images | Score |
|-------|--------------|--------|-------|
| 1     | LAT P-ID2070 | 4      | 4     |
| 2     | LAT P-ID2074 | 4      | 1     |
| 3     | LAT P-ID2262 | 4      | 4     |
| 4     | LAT P-ID2304 | 4      | 2     |
| 5     | LAT P-ID2305 | 4      | 4     |
| 6     | LAT P-ID2322 | 4      | 4     |
| 7     | LAT P-ID2435 | 4      | 4     |
| 8     | LAT P-ID2436 | 4      | 4     |
| 9     | LAT P-ID2466 | 4      | 3     |
| 10    | LAT P-ID2558 | 4      | 1     |
| 11    | LAT P-ID211  | 5      | 1     |
| 12    | LAT P-ID500  | 5      | 4     |
| 13    | LAT P-ID519  | 5      | 4     |
| 14    | LAT P-ID1511 | 5      | 4     |
| 15    | LAT P-ID1654 | 5      | 4     |

**FEMALE SAMPLES FOR MASS SPEC ANALYSIS 05/10/16 Stella Chang**

| Count | Spot ID      | Images | Score |
|-------|--------------|--------|-------|
| 1     | LAT F-ID223  | 8      | 4     |
| 2     | LAT F-ID226  | 8      | 3     |
| 3     | LAT F-ID299  | 8      | 4     |
| 4     | LAT F-ID363  | 8      | 1     |
| 5     | LAT F-ID403  | 8      | 4     |
| 6     | LAT F-ID533  | 8      | 4     |
| 7     | LAT F-ID541  | 8      | 4     |
| 8     | LAT F-ID548  | 8      | 3     |
| 9     | LAT F-ID625  | 8      | 1     |
| 10    | LAT F-ID654  | 8      | 1     |
| 11    | LAT F-ID779  | 8      | 3     |
| 12    | LAT F-ID1051 | 9      | 1     |
| 13    | LAT F-ID1253 | 9      | 4     |
| 14    | LAT F-ID903  | 9      | 1     |
| 15    | LAT F-ID911  | 9      | 4     |
| 16    | LAT F-ID972  | 9      | 4     |
| 17    | LAT F-ID978  | 9      | 3     |

---



**MALE SAMPLES FOR MASS SPEC ANALYSIS 05/10/16 Stella Chang**

| Count | Spot ID      | Images | Score |
|-------|--------------|--------|-------|
| 1     | LAT M-ID1251 | 6      | 4     |
| 2     | LAT M-ID1261 | 6      | 4     |
| 3     | LAT M-ID1288 | 6      | 1     |
| 4     | LAT M-ID1344 | 6      | 1     |
| 5     | LAT M-ID1535 | 6      | 4     |
| 6     | LAT M-ID1617 | 6      | 1     |
| 7     | LAT M-ID1475 | 7      | 4     |
| 8     | LAT M-ID1561 | 7      | 4     |

# Egg - Image 1

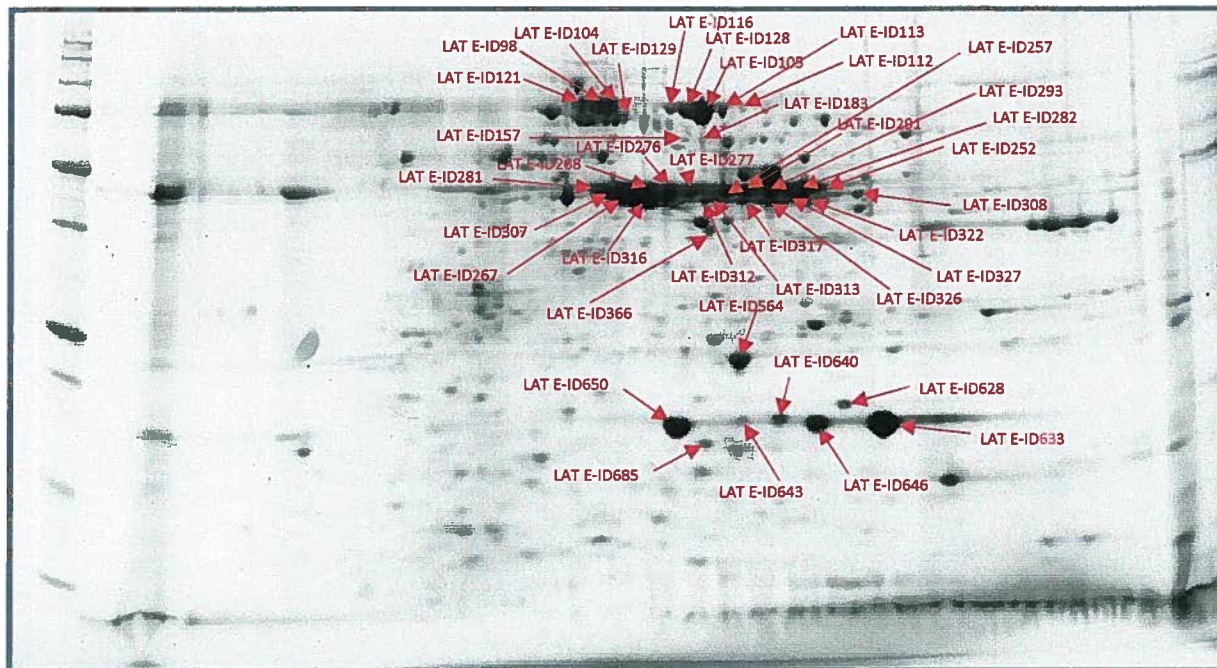

# Larva- Image 2

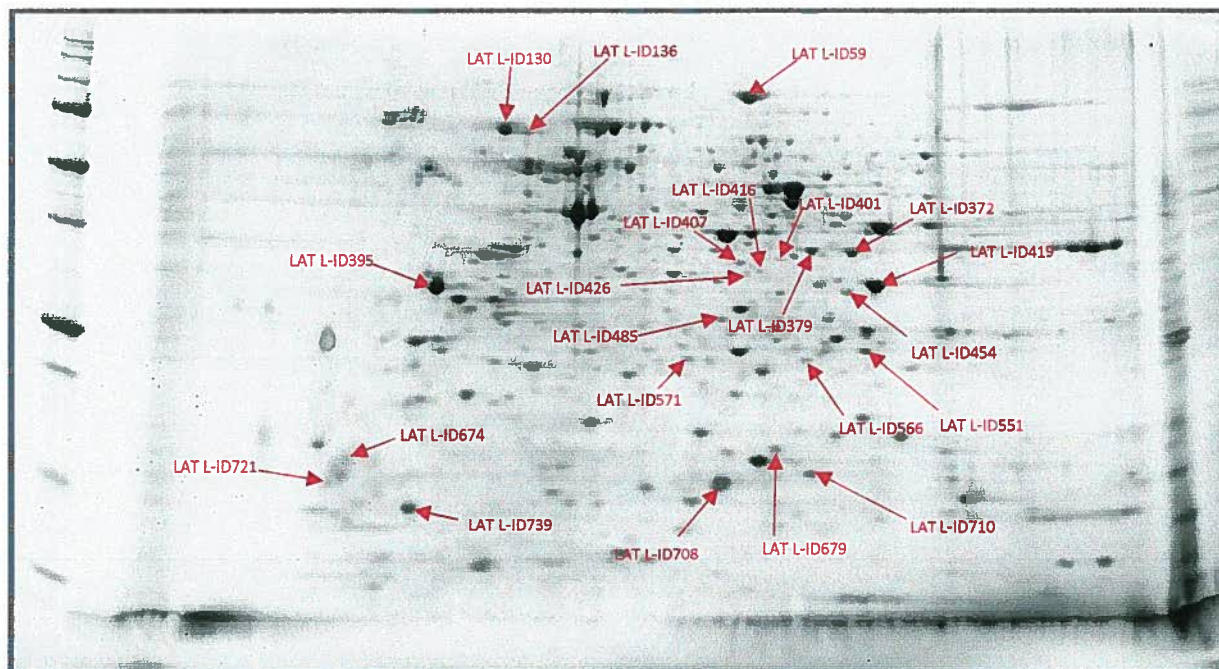



Larva- Image 3

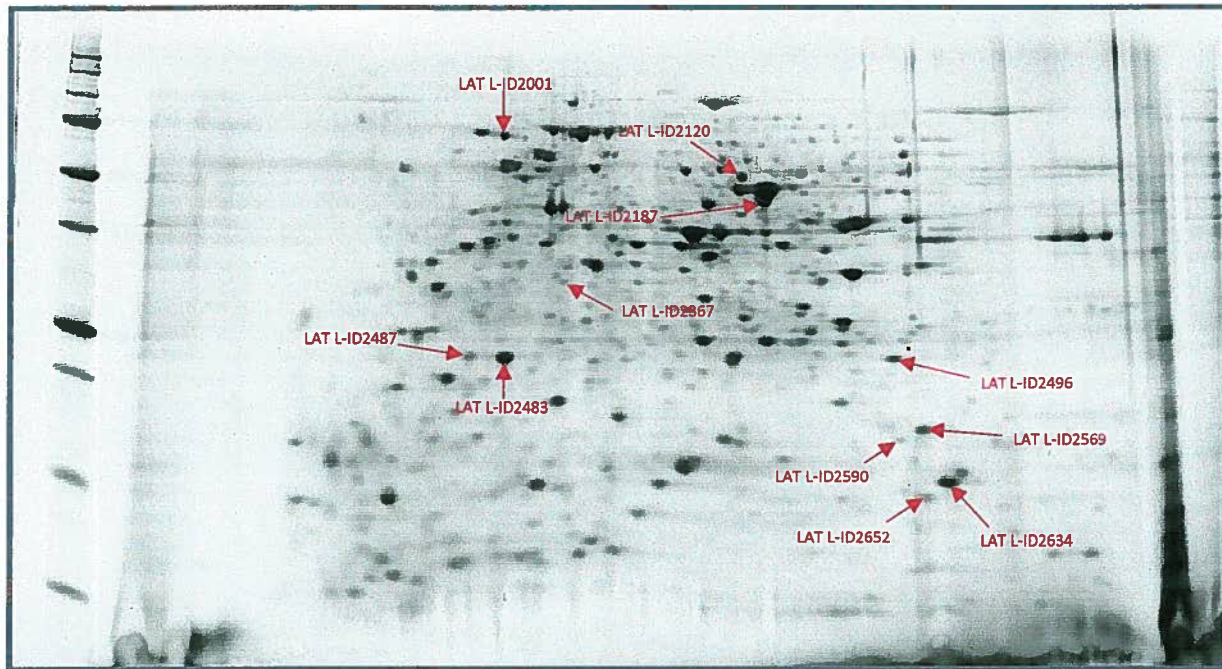

Pupa- Image 4

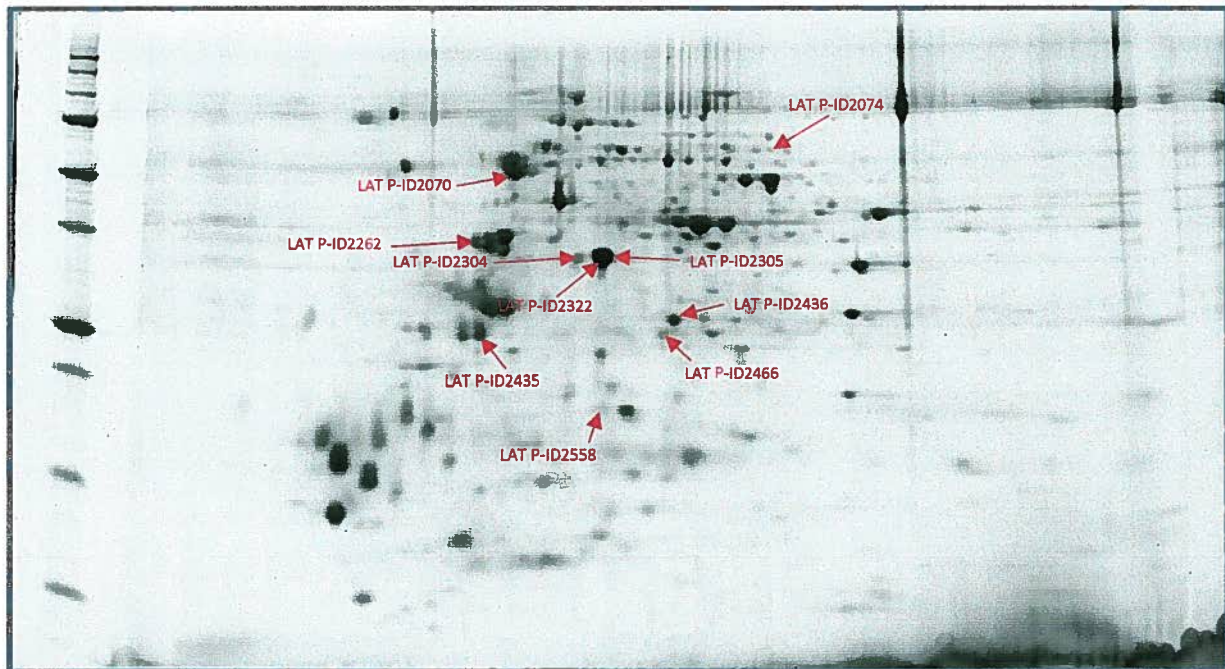

Pupa- Image 5

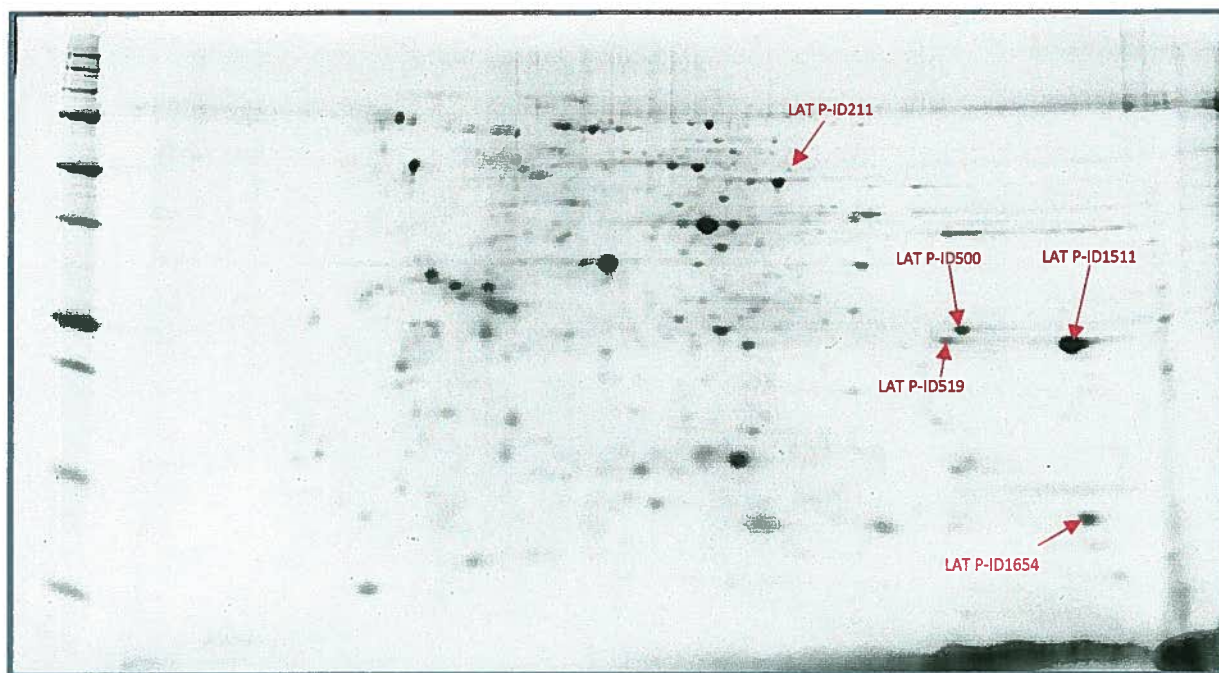

Male- Image 6

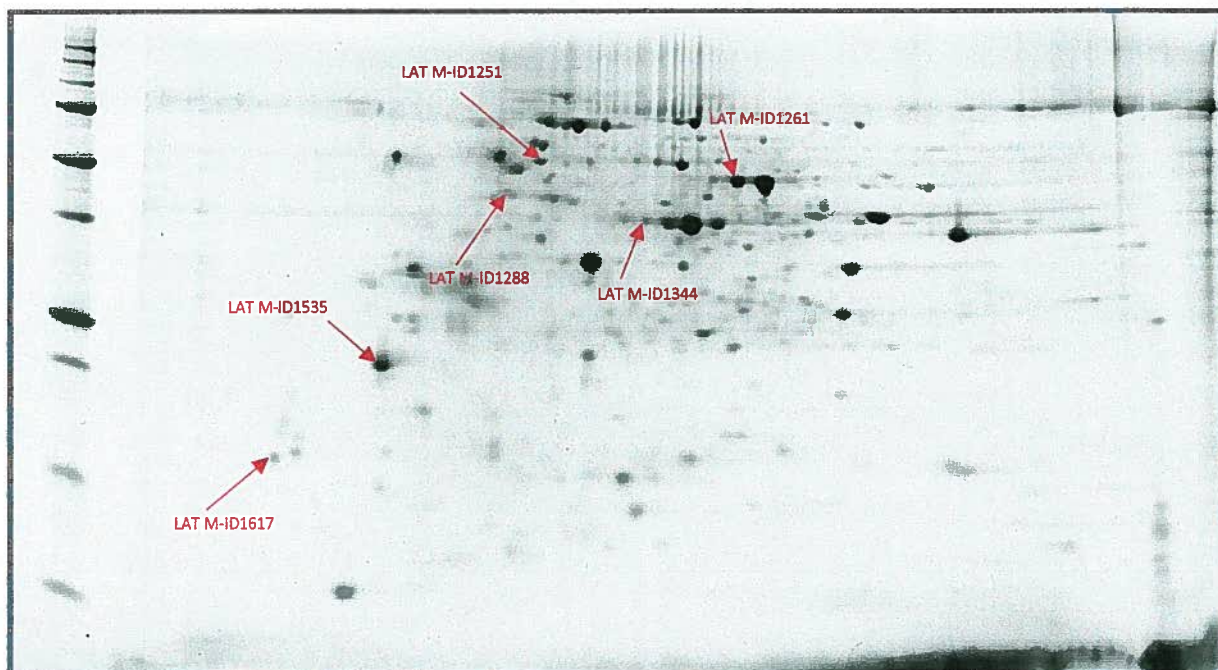



Male- Image 7

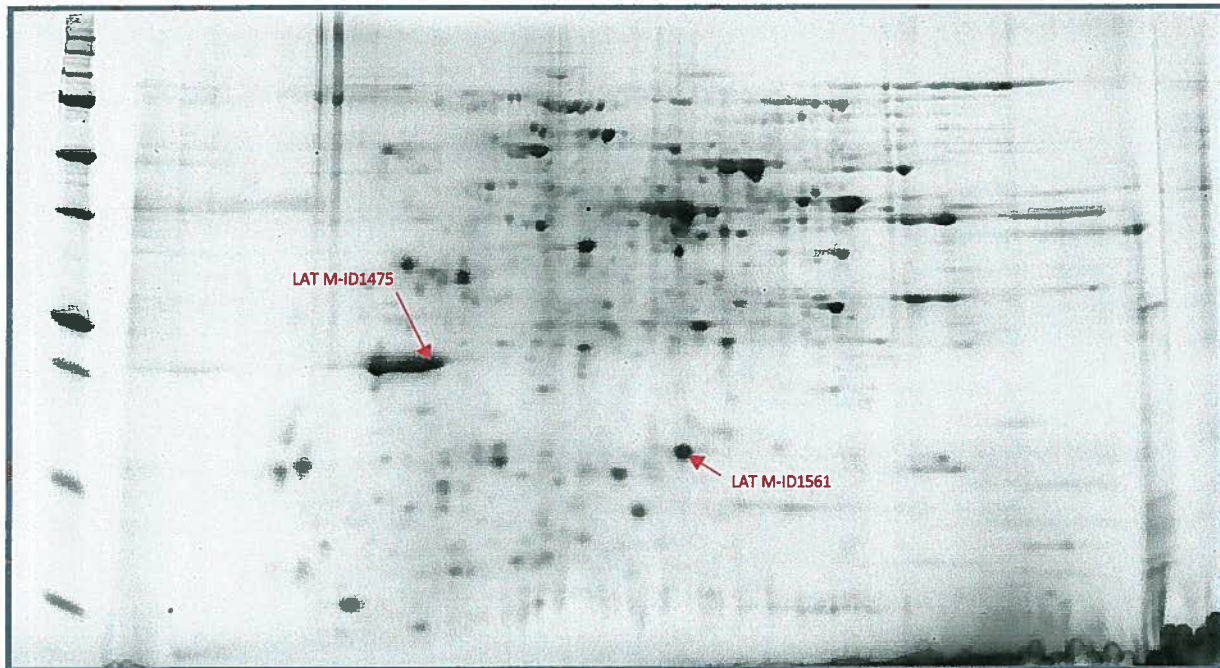

Female- Image 8

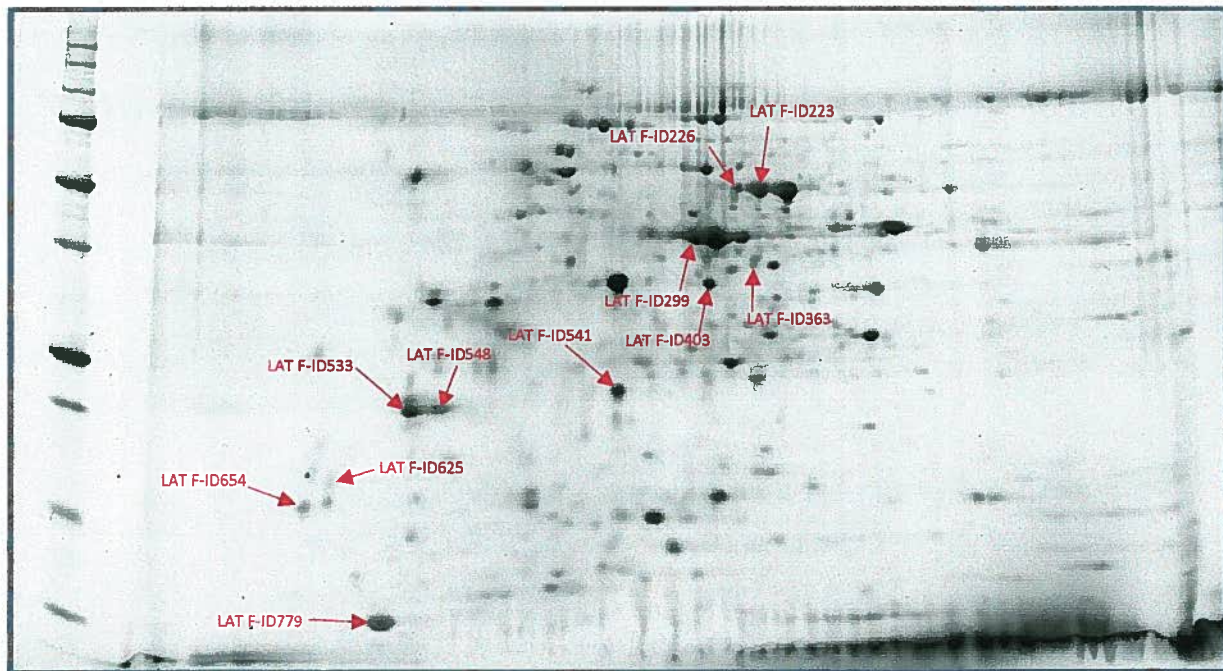

## Female- Image 9

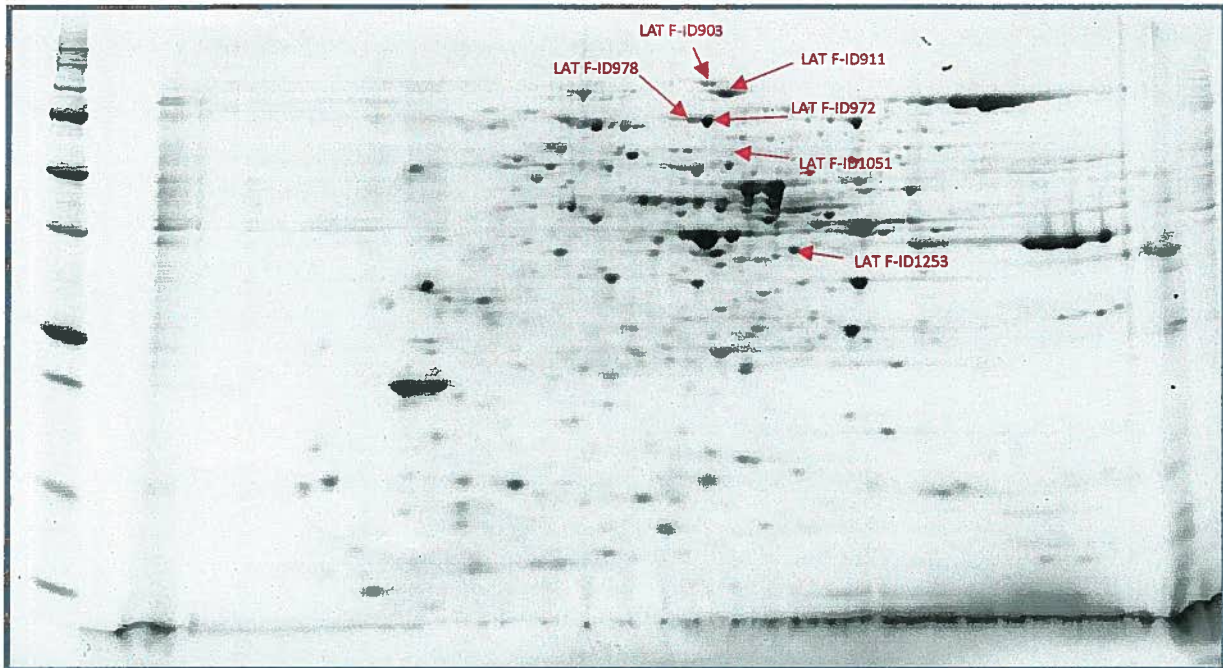

Supplement: s1 [file s1]
