# Supplementary material for: Comparative Proteomic Profiling between Each of Two Consecutive Developmental Stages of the Solanum Fruit Fly, Bactrocera latifrons (Hendel)
Source: MDPI journal article supplement (doi:10.3390/ijms19071996), 2018-07-09
Supplement: s1 [file s1]

| Stage-age | Accession number | MW     | pI   | PS  | Ion | No. | %  | pE Value | Peptide Sequence (with highest ion score) | Protein names                                | Ratio* | SE    | p-value |
|-----------|------------------|--------|------|-----|-----|-----|----|----------|-------------------------------------------|----------------------------------------------|--------|-------|---------|
| E3-104    | XP_018793231.1   | 75905  | 5.52 | 430 | 278 | 48  | 61 | 1.50E-36 | ELNDDNSIITVINIGPR (83)                    | Maltase 2-like isoform X1                    | 0.11   | 6.37  | 0.0000  |
| E3-105    | XP_018784870.1   | 72440  | 6.29 | 955 | 636 | 53  | 82 | 4.70E-89 | AVTEYHTCNLEANLPSAVFIR (149)               | Transferrin                                  | 0.04   | 6.91  | 0.0006  |
| E3-112    | XP_018784870.1   | 72440  | 6.29 | 799 | 559 | 38  | 69 | 1.90E-73 | AVTEYHTCNLEANLPSAVFIR (118)               | Transferrin                                  | 0.24   | 0.47  | 0.0000  |
| E3-113    | XP_018784870.1   | 72440  | 6.29 | 774 | 533 | 54  | 77 | 5.90E-71 | AVTEYHTCNLEANLPSAVFIR (128)               | Transferrin                                  | 0.07   | 2.54  | 0.0001  |
| E3-116    | XP_018784870.1   | 72440  | 6.29 | 774 | 580 | 50  | 74 | 5.90E-71 | AVTEYHTCNLEANLPSAVFIR (146)               | Transferrin                                  | 0.12   | 2.37  | 0.0008  |
| E3-121    | XP_018793231.1   | 75905  | 5.52 | 524 | 436 | 57  | 65 | 5.90E-46 | ELNDDNSIITVINIGPR (142)                   | Maltase 2-like isoform X1                    | 0.28   | 3.00  | 0.0009  |
| E3-128    | XP_018784870.1   | 72440  | 6.29 | 928 | 614 | 46  | 77 | 2.40E-86 | NADLVVVPGNQYVDAR (124)                    | Transferrin                                  | 0.04   | 7.90  | 0.0004  |
| E3-129    | XP_018793231.1   | 75905  | 5.52 | 564 | 443 | 52  | 54 | 5.90E-50 | ELNDDNSIITVINIGPR (138)                   | Maltase 2-like isoform X1                    | 0.35   | 0.66  | 0.0019  |
| E3-149    | XP_018793231.1   | 75905  | 5.52 | 122 | 102 | 34  | 50 | 9.40E-06 | ELNDDNSIITVINIGPR (60)                    | Maltase 2-like isoform X1                    | 0.05   | 2.76  | 0.0004  |
| E3-157    | XP_018784870.1   | 72440  | 6.29 | 426 | 328 | 31  | 54 | 3.70E-36 | AVTEYHTCNLEANLPSAVFIR (99)                | Transferrin                                  | 0.44   | 0.47  | 0.0011  |
| E3-183    | XP_018784870.1   | 72440  | 6.29 | 539 | 441 | 38  | 72 | 1.90E-47 | AVTEYHTCNLEANLPSAVFIR (98)                | Transferrin                                  | 0.26   | 1.18  | 0.0015  |
| E3-252    | XP_018798053.1   | 48195  | 8.64 | 327 | 226 | 33  | 64 | 3.00E-26 | YYAESVRPGNEHNFAAVPASSK (85)               | Vitellogenin-1-like                          | 0.26   | 0.85  | 0.0005  |
| E3-257    | XP_018798053.1   | 48195  | 8.64 | 279 | 205 | 33  | 68 | 1.90E-21 | YYAESVRPGNEHNFAAVPASSK (66)               | Vitellogenin-1-like                          | 0.36   | 1.97  | 0.0037  |
| E3-267    | XP_018787380.1   | 48061  | 6.48 | 553 | 432 | 41  | 67 | 7.40E-49 | NFFPVGANSIDQYENNDGAGKR (159)              | Vitellogenin-1                               | 0.14   | 6.34  | 0.0000  |
| E3-268    | XP_018787380.1   | 48061  | 6.48 | 545 | 446 | 33  | 66 | 4.70E-48 | NFFPVGANSIDQYENNDGAGKR (165)              | Vitellogenin-1                               | 0.07   | 0.98  | 0.0000  |
| E3-276    | XP_018787380.1   | 48061  | 6.48 | 540 | 412 | 46  | 72 | 1.50E-47 | NFFPVGANSIDQYENNDGAGKR (125)              | Vitellogenin-1                               | 0.25   | 1.10  | 0.0001  |
| E3-277    | XP_018787380.1   | 48061  | 6.48 | 344 | 255 | 39  | 74 | 5.90E-28 | NFFPVGANSIDQYENNDGAGKR (117)              | Vitellogenin-1                               | 0.12   | 1.59  | 0.0004  |
| E3-281    | XP_018787380.1   | 48061  | 6.48 | 419 | 353 | 34  | 64 | 1.90E-35 | GDADFVDIAHTSTCGM1GTR (121)                | Vitellogenin-1                               | 0.25   | 2.53  | 0.0026  |
| E3-282    | XP_018798053.1   | 48195  | 8.64 | 432 | 256 | 52  | 85 | 9.40E-37 | QGSYHGLHQAWR (80)                         | Vitellogenin-1-like                          | 0.15   | 1.13  | 0.0000  |
| E3-291    | XP_018798053.1   | 48195  | 8.64 | 340 | 178 | 45  | 80 | 1.50E-27 | QGSYHGLHQAWR (80)                         | Vitellogenin-1-like                          | 0.34   | 1.19  | 0.0009  |
| E3-293    | XP_018798053.1   | 48195  | 8.64 | 298 | 156 | 41  | 71 | 2.40E-23 | QGSYHGLHQAWR (64)                         | Vitellogenin-1-like                          | 0.09   | 1.37  | 0.0000  |
| E3-307    | XP_018787380.1   | 48061  | 6.48 | 434 | 309 | 40  | 62 | 5.90E-37 | NFFPVGANSIDQYENNDGAGKR (133)              | Vitellogenin-1                               | 0.17   | 2.85  | 0.0021  |
| E3-308    | XP_018787290.1   | 46162  | 6.62 | 219 | 152 | 31  | 69 | 1.90E-15 | GNADFVDIAHTSAYGLGSVAR (126)               | Vitellogenin-2-like                          | 0.17   | 5.79  | 0.0005  |
| E3-312    | XP_018787290.1   | 46162  | 6.62 | 389 | 353 | 26  | 65 | 1.90E-32 | GNADFVDIAHTSAYGLGSVAR (127)               | Vitellogenin-2-like                          | 0.11   | 9.88  | 0.0019  |
| E3-313    | XP_018787290.1   | 46162  | 6.62 | 295 | 266 | 24  | 65 | 4.70E-23 | GNADFVDIAHTSAYGLGSVAR (119)               | Vitellogenin-2-like                          | 0.39   | 0.57  | 0.0013  |
| E3-316    | XP_018787380.1   | 48061  | 6.48 | 517 | 376 | 48  | 77 | 3.00E-45 | NFFPVGANSIDQYENNDGAGKR (131)              | Vitellogenin-1                               | 0.10   | 1.65  | 0.0002  |
| E3-317    | XP_018787290.1   | 46162  | 6.62 | 493 | 453 | 28  | 73 | 7.40E-43 | GNADFVDIAHTSAYGLGSVAR (138)               | Vitellogenin-2-like                          | 0.46   | 1.03  | 0.0017  |
| E3-322    | XP_018787290.1   | 46162  | 6.62 | 410 | 352 | 29  | 75 | 1.50E-34 | GNADFVDIAHTSAYGLGSVAR (142)               | Vitellogenin-2-like                          | 0.39   | 0.45  | 0.0002  |
| E3-326    | XP_018787290.1   | 46162  | 6.62 | 555 | 532 | 24  | 61 | 4.70E-49 | GNADFVDIAHTSAYGLGSVAR (137)               | Vitellogenin-2-like                          | 0.43   | 1.83  | 0.0019  |
| E3-327    | XP_018787290.1   | 46162  | 6.62 | 378 | 266 | 37  | 70 | 2.40E-31 | GNADFVDIAHTSAYGLGSVAR (150)               | Vitellogenin-2-like                          | 0.19   | 1.65  | 0.0007  |
| E3-366    | XP_018791497.1   | 36639  | 6.09 | 400 | 253 | 40  | 78 | 1.50E-33 | GAYCYCADNGVGQPDER (75)                    | Protein amalgam                              | 0.32   | 0.41  | 0.0050  |
| E3-564    | XP_011201883.1   | 21998  | 6.09 | 572 | 494 | 26  | 80 | 9.40E-51 | DYGVLDDEETGIPPR (115)                     | Peroxisomal protein                          | 0.27   | 1.24  | 0.0000  |
| E3-628    | XP_018795769.1   | 22302  | 7.77 | 699 | 634 | 29  | 90 | 1.90E-63 | NFKELAEKPEGEYKGSK (127)                   | Peptidyl-prolyl cis-trans isomerase 5        | 0.46   | 0.80  | 0.0043  |
| E3-633    | XP_018788060.1   | 18433  | 7.11 | 344 | 309 | 22  | 82 | 5.90E-28 | DGFQVSMIDVAHFKEPSELNVR (132)              | Heat shock protein 23-like                   | 0.16   | 1.85  | 0.0000  |
| E3-640    | XP_018788060.1   | 18433  | 7.11 | 320 | 311 | 15  | 77 | 1.50E-25 | DGFQVSMIDVAHFKEPSELNVR (131)              | Heat shock protein 23-like                   | 0.12   | 2.64  | 0.0001  |
| E3-643    | XP_018788060.1   | 18433  | 7.11 | 232 | 271 | 14  | 73 | 9.40E-17 | DGFQVSMIDVAHFKEPSELNVR (79)               | Heat shock protein 23-like                   | 0.08   | 3.13  | 0.0000  |
| E3-646    | XP_018788060.1   | 18433  | 7.11 | 364 | 356 | 18  | 78 | 5.90E-30 | DGFQVSMIDVAHFKEPSELNVR (142)              | Heat shock protein 23-like                   | 0.19   | 3.01  | 0.0008  |
| E3-650    | XP_018788062.1   | 19058  | 5.96 | 244 | 220 | 13  | 82 | 5.90E-18 | VVQIQQTGPAHLNVKENPK (70)                  | Heat shock protein 23-like                   | 0.23   | 1.06  | 0.0000  |
| E3-685    | XP_018797702.1   | 20084  | 8.69 | 353 | 279 | 21  | 87 | 7.40E-29 | SLELTIDPLPGLGLR (99)                      | Peroxisomal protein                          | 0.49   | 1.58  | 0.0022  |
| E3-709    | XP_018799095.1   | 17076  | 5.10 | 309 | 225 | 24  | 69 | 1.90E-24 | RKENNYPDVESVR (50)                        | General odorant-binding protein 99a-like     | 0.25   | 0.38  | 0.0000  |
| E3-98     | XP_018793231.1   | 75905  | 5.52 | 726 | 553 | 59  | 67 | 3.70E-66 | ELNDDNSIITVINIGPR (145)                   | Maltase 2-like isoform X1                    | 0.25   | 1.41  | 0.0001  |
| L1-130    | XP_018793742.1   | 62297  | 4.97 | 308 | 252 | 27  | 38 | 2.40E-24 | EIPGETINLQTCVR (94)                       | Uncharacterized protein LOC108971874         | 4.37   | 0.07  | 0.0003  |
| L1-136    | XP_018793741.1   | 61607  | 5.00 | 363 | 254 | 32  | 51 | 7.40E-30 | GQPYCSLNPACPLTTR (111)                    | Uncharacterized protein LOC108971872 iso     | 5.89   | 0.15  | 0.0014  |
| L1-304    | XP_004526477.1   | 42118  | 5.23 | 877 | 669 | 44  | 81 | 3.00E-81 | TTGIVLDSGDGVSHTVPYIEGYALPHAIL             | Actin-2, muscle-specific                     | 3.82   | 0.37  | 0.0000  |
| L1-365    | XP_018799378.1   | 33064  | 4.82 | 406 | 308 | 38  | 72 | 3.70E-34 | KLAFVEDELEVAEDRVR (86)                    | Tropomyosin-2 isoform X2                     | 20.31  | 0.03  | 0.0001  |
| L1-372    | XP_018802321.1   | 36231  | 6.99 | 428 | 304 | 27  | 44 | 2.40E-36 | LCIVTAGVR (63)                            | L-lactate dehydrogenase                      | 2.67   | 2.04  | 0.0044  |
| L1-378    | XP_018799300.1   | 32898  | 4.71 | 851 | 673 | 42  | 90 | 1.20E-78 | ALQNAESEVAALNR (117)                      | Tropomyosin-2 isoform X20                    | 7.12   | 0.08  | 0.0000  |
| L1-379    | XP_018783435.1   | 35904  | 6.67 | 350 | 218 | 31  | 60 | 1.50E-28 | AQQQAIDQHAR (68)                          | Malate dehydrogenase, cytoplasmic            | 2.62   | 0.27  | 0.0023  |
| L1-395    | XP_018795679.1   | 39452  | 4.66 | 529 | 363 | 22  | 86 | 1.90E-46 | KSELLAGLNSEGR (127)                       | Uncharacterized protein LOC108973107 iso     | 5.17   | 0.13  | 0.0000  |
| L1-401    | XP_018789491.1   | 39902  | 6.51 | 178 | 99  | 24  | 59 | 2.40E-11 | FLPVTHEEPTGNCSTPSYK (40)                  | UDP-glucose 4-epimerase                      | 5.13   | 0.43  | 0.0141  |
| L1-407    | XP_018804575.1   | 39830  | 7.04 | 300 | 205 | 26  | 52 | 1.50E-23 | NTPSYQSILEANVLR (91)                      | Fructose-bisphosphate aldolase               | 6.18   | 0.15  | 0.0023  |
| L1-416    | XP_018787334.1   | 35757  | 8.26 | 356 | 282 | 18  | 72 | 3.70E-29 | VPTPNVSVVDLTVR (113)                      | Glyceraldehyde-3-phosphate dehydrogenase     | 4.45   | 0.08  | 0.0006  |
| L1-419    | XP_018804543.1   | 31185  | 7.11 | 737 | 506 | 52  | 94 | 3.00E-67 | GLIQGHGFLQIETPYALEGKPR (154)              | Trehalose-phosphate phosphatase B            | 15.82  | 0.18  | 0.0001  |
| L1-426    | XP_004519638.1   | 59908  | 6.51 | 93  | 24  | 20  | 34 | 7.80E-03 | TLAQNGCANTR (22)                          | T-complex protein 1 subunit gamma            | 23.12  | 0.09  | 0.0010  |
| L1-454    | XP_018804039.1   | 35059  | 8.53 | 298 | 186 | 19  | 68 | 2.40E-23 | QGLDPHFVFAIINSSGTR (75)                   | Probable 3-hydroxyisobutyrate dehydrogenase  | 2.14   | 0.76  | 0.0006  |
| L1-485    | XP_018804575.1   | 39830  | 7.04 | 216 | 124 | 21  | 52 | 3.70E-15 | NTPSYQSILEANVLR (94)                      | Fructose-bisphosphate aldolase               | 2.01   | 0.45  | 0.0268  |
| L1-551    | XP_018804543.1   | 31185  | 7.11 | 441 | 326 | 35  | 83 | 1.20E-37 | GLIQGHGFLQIETPYALEGKPR (119)              | Trehalose-phosphate phosphatase B            | 2.04   | 0.89  | 0.0024  |
| L1-563    | XP_018794827.1   | 27527  | 5.13 | 606 | 418 | 29  | 75 | 3.70E-54 | TTLDLGLTGTFPEEFNQYLHK (153)               | Uncharacterized protein LOC108972624         | 3.30   | 0.17  | 0.0422  |
| L1-565    | XP_018794827.1   | 27527  | 5.13 | 972 | 671 | 36  | 83 | 9.40E-91 | TTLDLGLTGTFPEEFNQYLHK (129)               | Uncharacterized protein LOC108972624         | 26.86  | 0.04  | 0.0007  |
| L1-566    | XP_011210145.1   | 25805  | 7.53 | 309 | 246 | 15  | 55 | 1.90E-24 | SQGDWSPSGGIGLPQPDNR (88)                  | Uncharacterized protein LOC105230849         | 6.57   | 0.14  | 0.0006  |
| L1-571    | XP_018793665.1   | 21623  | 5.95 | 362 | 252 | 18  | 81 | 9.40E-30 | LLDQHFPTGLR (68)                          | Protein lethal(2)essential for life          | 2.13   | 0.89  | 0.0017  |
| L1-59     | XP_018791794.1   | 101121 | 5.91 | 820 | 551 | 73  | 71 | 1.50E-75 | ALNALSAPSGLEEPCFLKR (87)                  | Filamin-A isoform X2                         | 34.34  | 0.24  | 0.0000  |
| L1-674    | XP_018787727.1   | 16173  | 4.51 | 184 | 139 | 9   | 43 | 5.69E-12 | TVVYEADENGYR (71)                         | Larval cuticle protein A3A                   | 15.72  | 0.33  | 0.0000  |
| L1-679    | XP_018804351.1   | 20380  | 8.80 | 752 | 609 | 25  | 84 | 9.40E-69 | KDIAQVTNTVFALGR (146)                     | Muscle-specific protein 20                   | 3.02   | 0.35  | 0.0018  |
| L1-708    | XP_018799091.1   | 17334  | 6.44 | 387 | 347 | 17  | 67 | 3.00E-32 | KLGVFEHEGYHADR (92)                       | General odorant-binding protein 99a-like iso | 2.01   | 0.65  | 0.0004  |
| L1-710    | XP_018788026.1   | 19242  | 7.85 | 597 | 569 | 18  | 72 | 3.00E-53 | ITQKHPEYTGPSLGPK (89)                     | Myophilin                                    | 12.10  | 0.07  | 0.0000  |
| L1-721    | XP_014094514.1   | 11272  | 4.28 | 139 | 132 | 2   | 37 | 1.90E-07 | SDVDPEKYSFALK (75)                        | Larval cuticle protein 8-like                | 7.70   | 0.30  | 0.0000  |
| L1-739    | XP_018797071.1   | 11722  | 4.58 | 511 | 383 | 16  | 82 | 1.20E-44 | ILSSVGIEVDSEIR (118)                      | 60S acidic ribosomal protein P2              | 3.64   | 0.23  | 0.0015  |
| L1-750    | XP_018803514.1   | 11521  | 4.24 | 187 | 154 | 6   | 96 | 3.00E-12 | AANVDVEPYWPLGFAK (105)                    | 60S acidic ribosomal protein P1              | 3.90   | 0.39  | 0.0008  |
| L10-199   | XP_018793742.1   | 62297  | 4.97 | 308 | 252 | 27  | 38 | 2.40E-24 | EIPGETINLQTCVR (94)                       | Uncharacterized protein LOC108971874         | 0.41   | 0.89  | 0.0054  |
| L10-200   | XP_018793741.1   | 61607  | 5.00 | 177 | 90  | 29  | 46 | 3.00E-11 | GQPYCSLNPACPLTTR (42)                     | Uncharacterized protein LOC108971872 iso     | 0.45   | 7.61  | 0.0119  |
| L10-212   | XP_018783509.1   | 52350  | 6.68 | 331 | 201 | 48  | 81 | 1.20E-26 | VAFGTGSAEIGR (68)                         | Aldehyde dehydrogenase X, Mitochondrial      | 0.50   | 0.15  | 0.0082  |
| L10-218   | XP_018790778.1   | 50825  | 8.87 | 342 | 307 | 30  | 69 | 9.40E-28 | LGDVYVNDFAFGTAHR (98)                     | Phosphoglycerate kinase                      | 0.34   | 21.21 | 0.0019  |
| L10-222   | XP_011208284.1   | 71578  | 5.42 | 704 | 713 | 33  | 40 | 5.90E-64 | DNNLLGKLFELSGIPAPR (143)                  | Heat shock 70 kDa protein cognate 4          | 0.35   | 0.59  | 0.0152  |
| L10-230   | XP_018794703.1   | 47086  | 4.53 | 451 | 344 | 22  | 88 | 1.20E-38 | FYSDENVKDLQTSQDAR (114)                   | Calreticulin                                 | 0.10   | 1.23  | 0.0001  |
| L10-232   | XP_018795679.1   | 39452  | 4.66 | 529 | 363 | 22  | 86 | 1.90E-46 | KSELLAGLNSEGR (127)                       | Uncharacterized protein LOC108973107 iso     | 0.42   | 0.60  | 0.0016  |
| L10-236   | XP_018789492.1   | 37690  | 8.65 | 251 | 198 | 29  | 59 | 1.20E-18 | TVVYEEEAELTEEIR (138)                     | Uncharacterized protein LOC108969313         | 0.33   | 0.66  | 0.0209  |
| L10-245   | XP_018802393.1   | 27184  | 6.89 | 658 | 552 | 24  | 78 | 2.40E-59 | VVIVTGASSGIGATAEFAK (140)                 | Uncharacterized protein LOC108977244         | 0.42   | 0.61  | 0.0002  |
| L10-248   | XP_018794827.1   | 27527  | 5.13 | 647 | 432 | 31  | 83 | 3.00E-58 | TTLDLGLTGTFPEEFNQYLHK (152)               | Uncharacterized protein LOC108972624         | 0.29   |       |         |
