# Supplementary figures and images for: Comparative Proteomic Profiling between Each of Two Consecutive Developmental Stages of the Solanum Fruit Fly, Bactrocera latifrons (Hendel)
Source: MDPI journal article supplement (doi:10.3390/ijms19071996), 2018-07-09

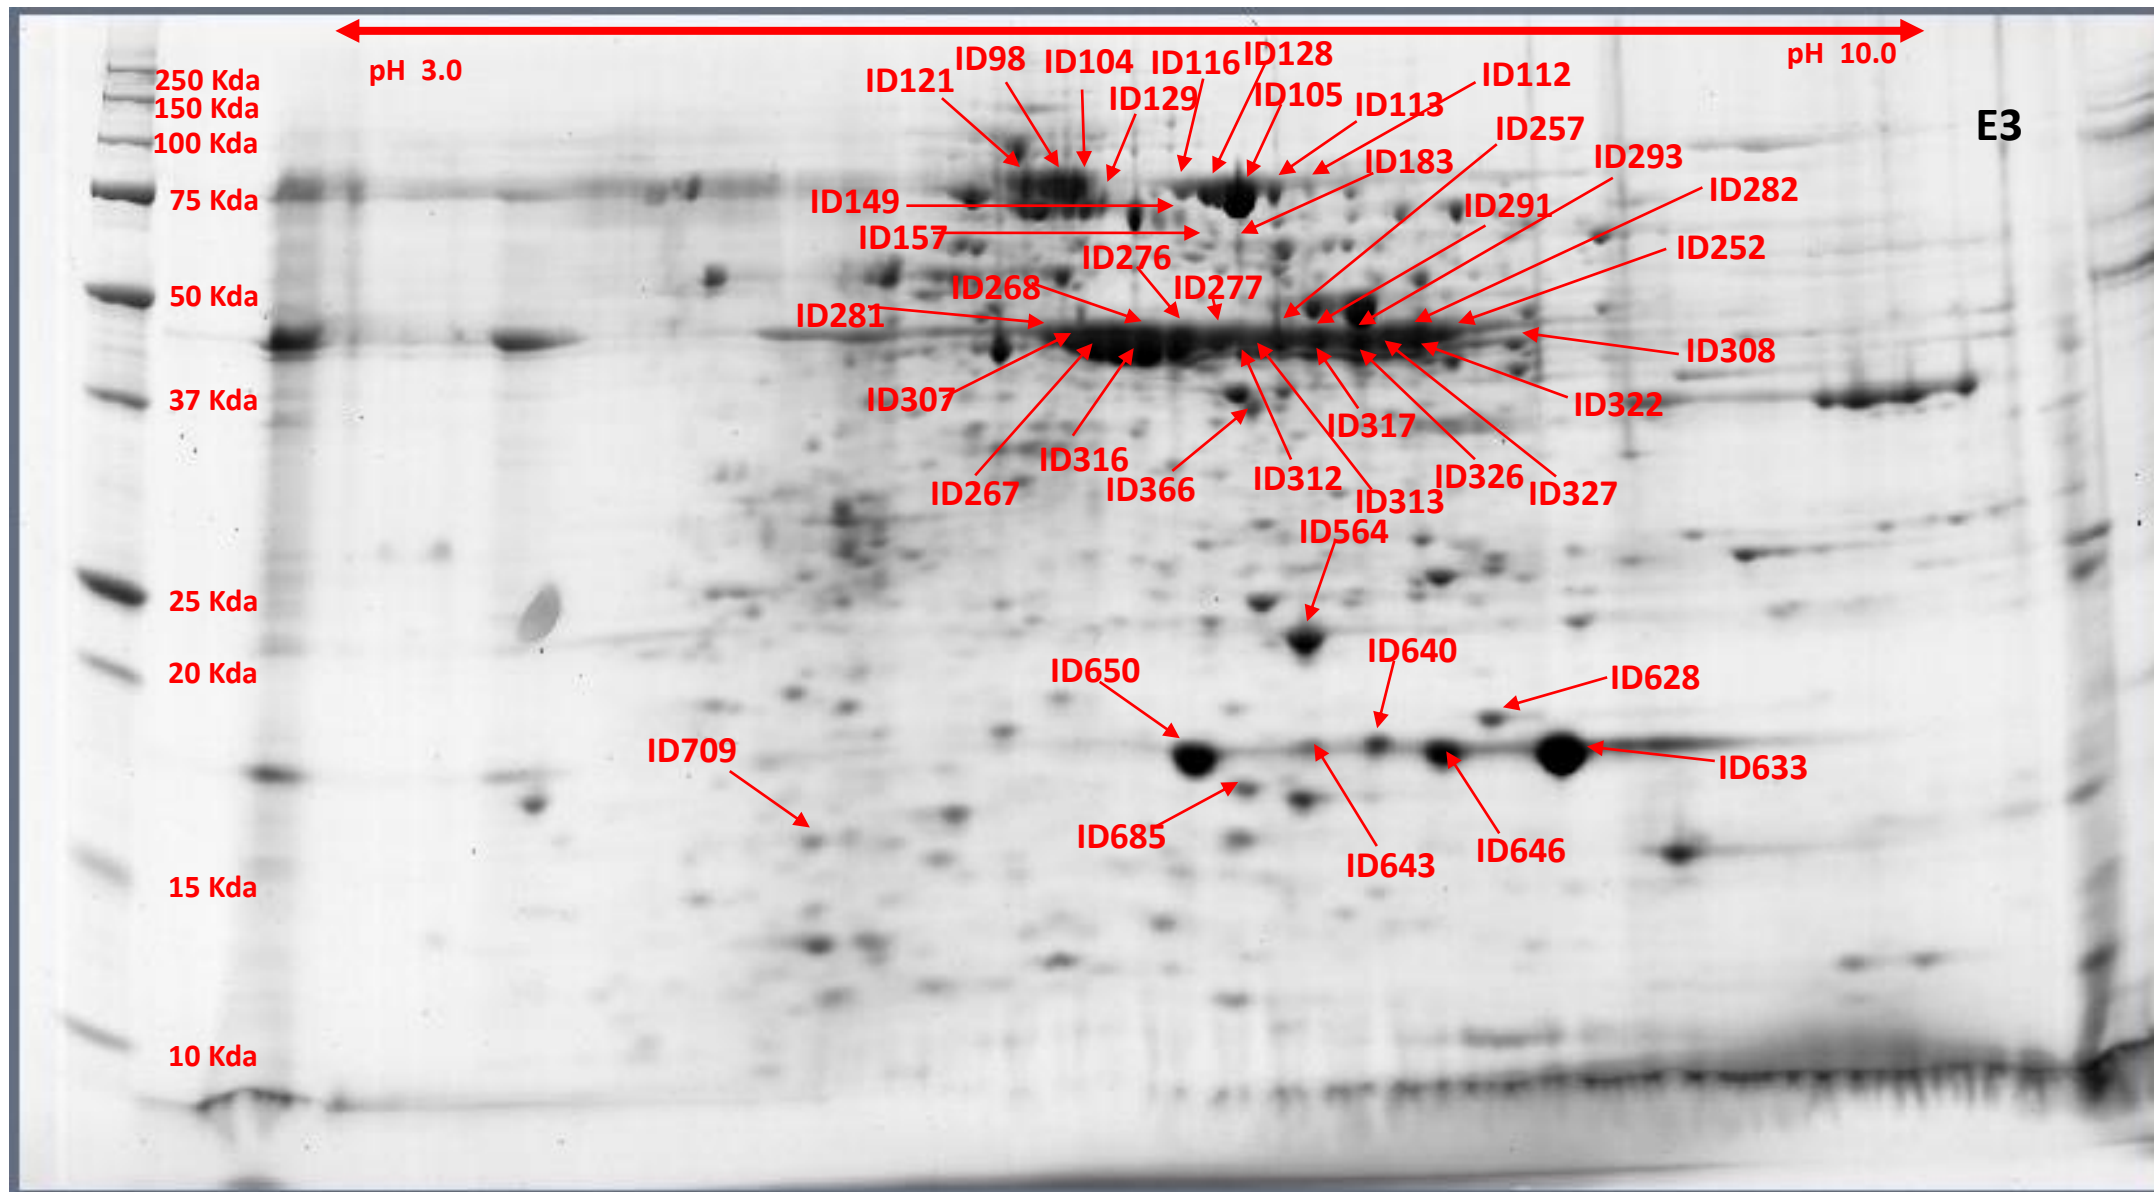

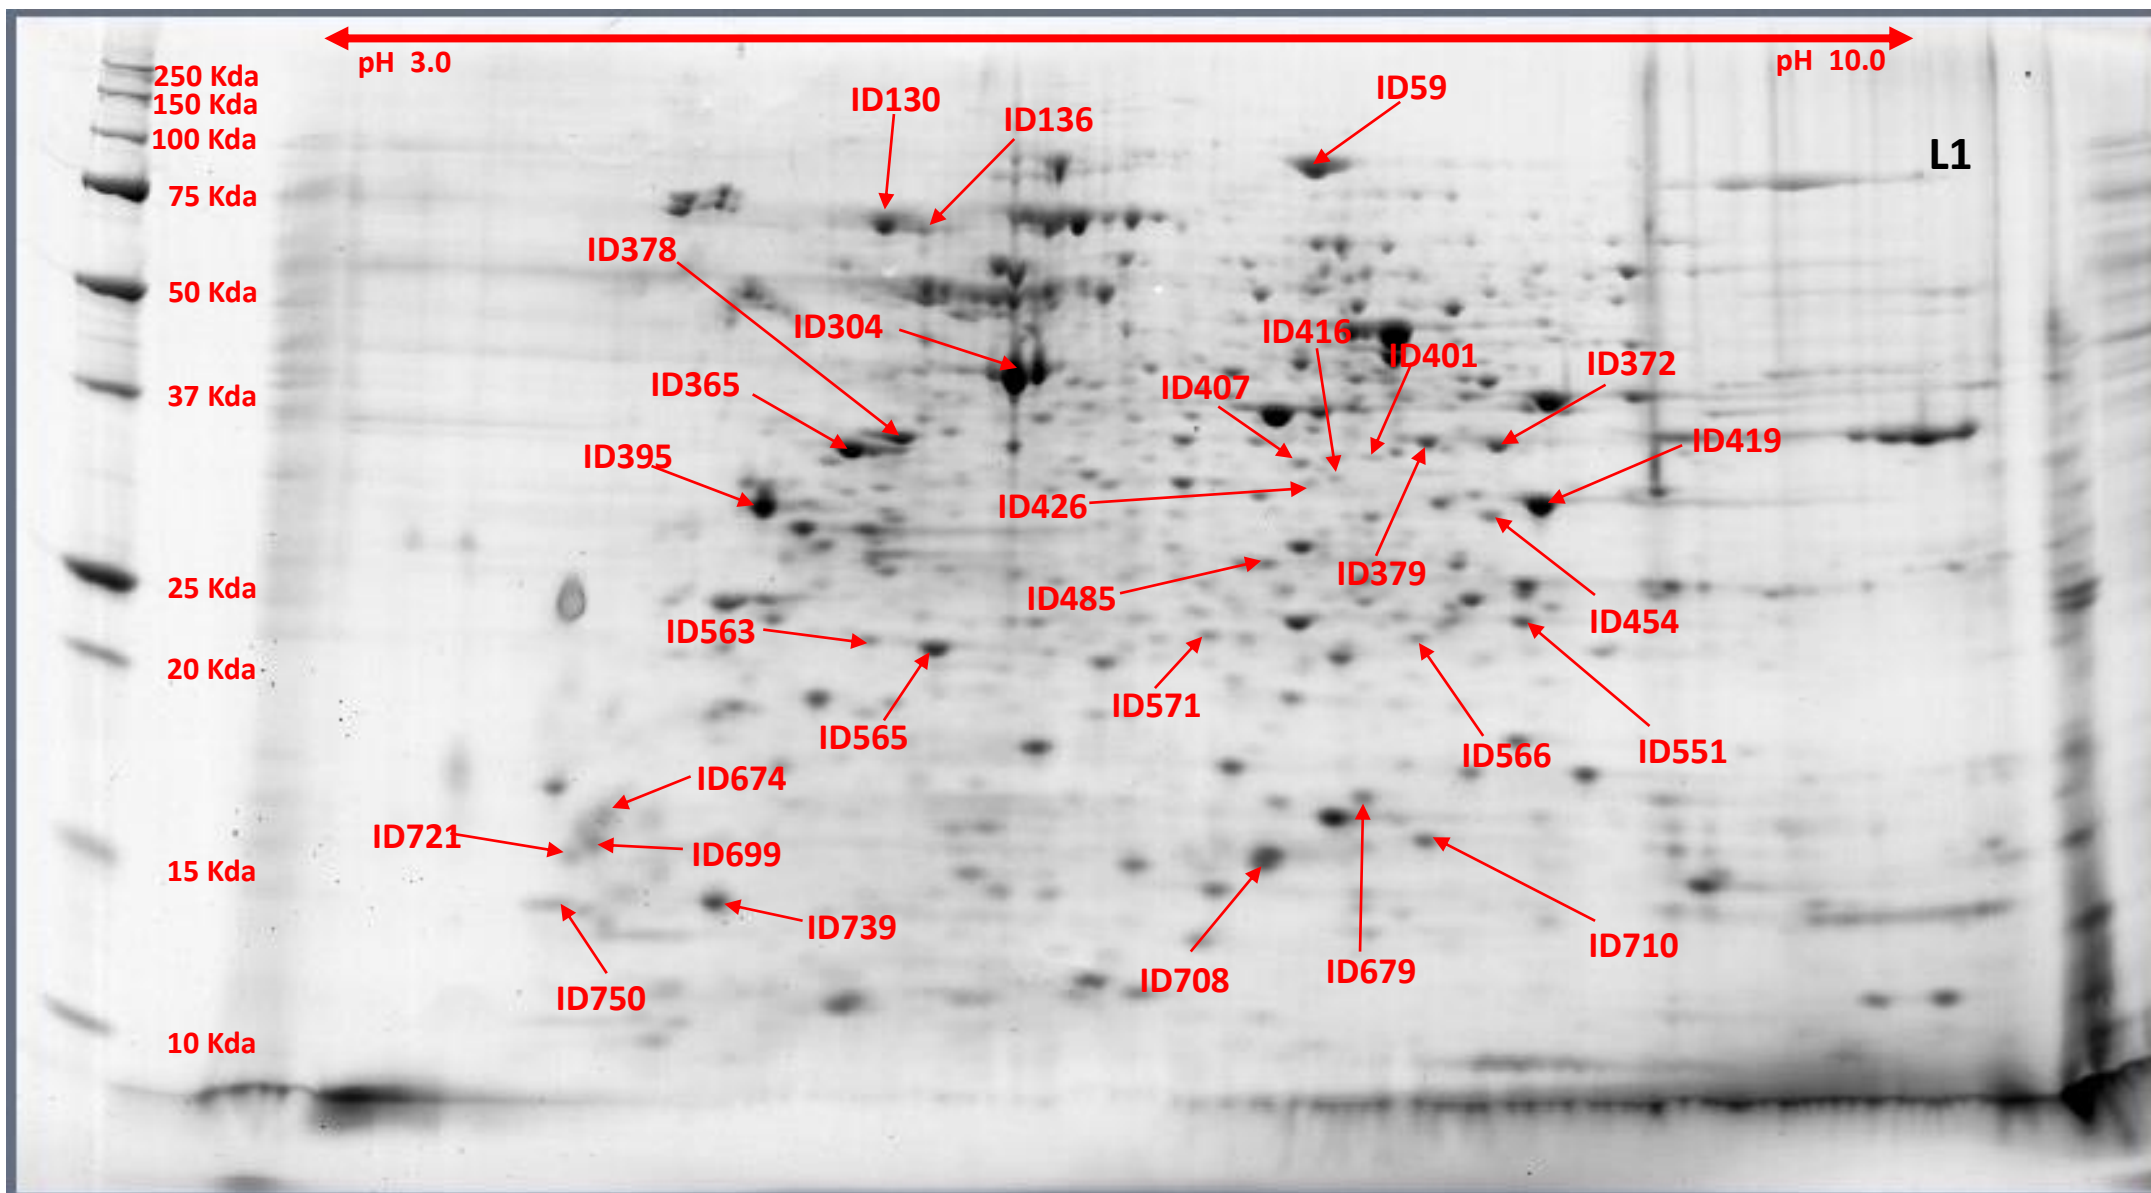

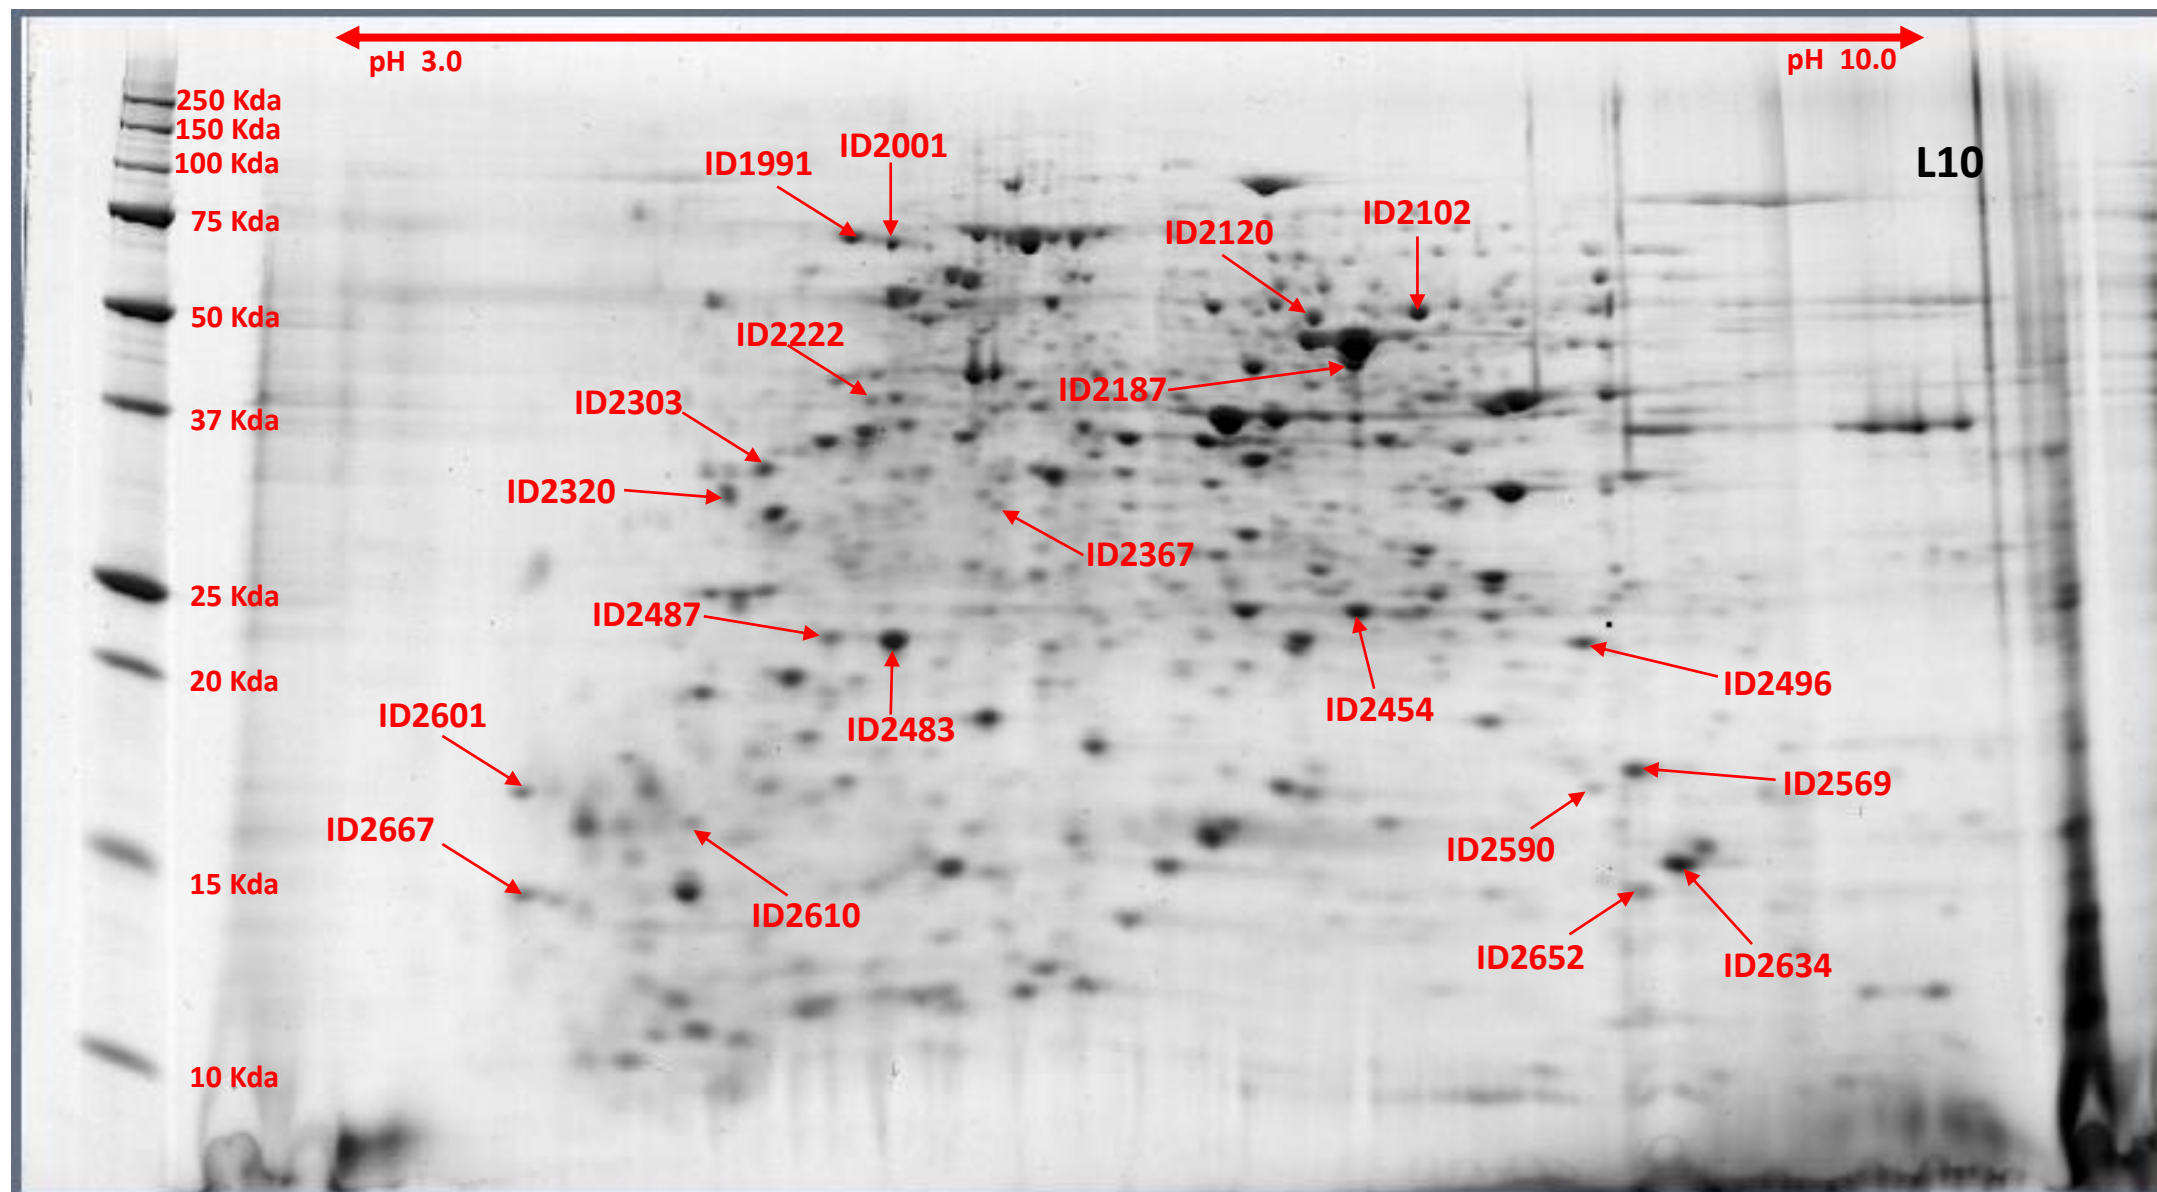

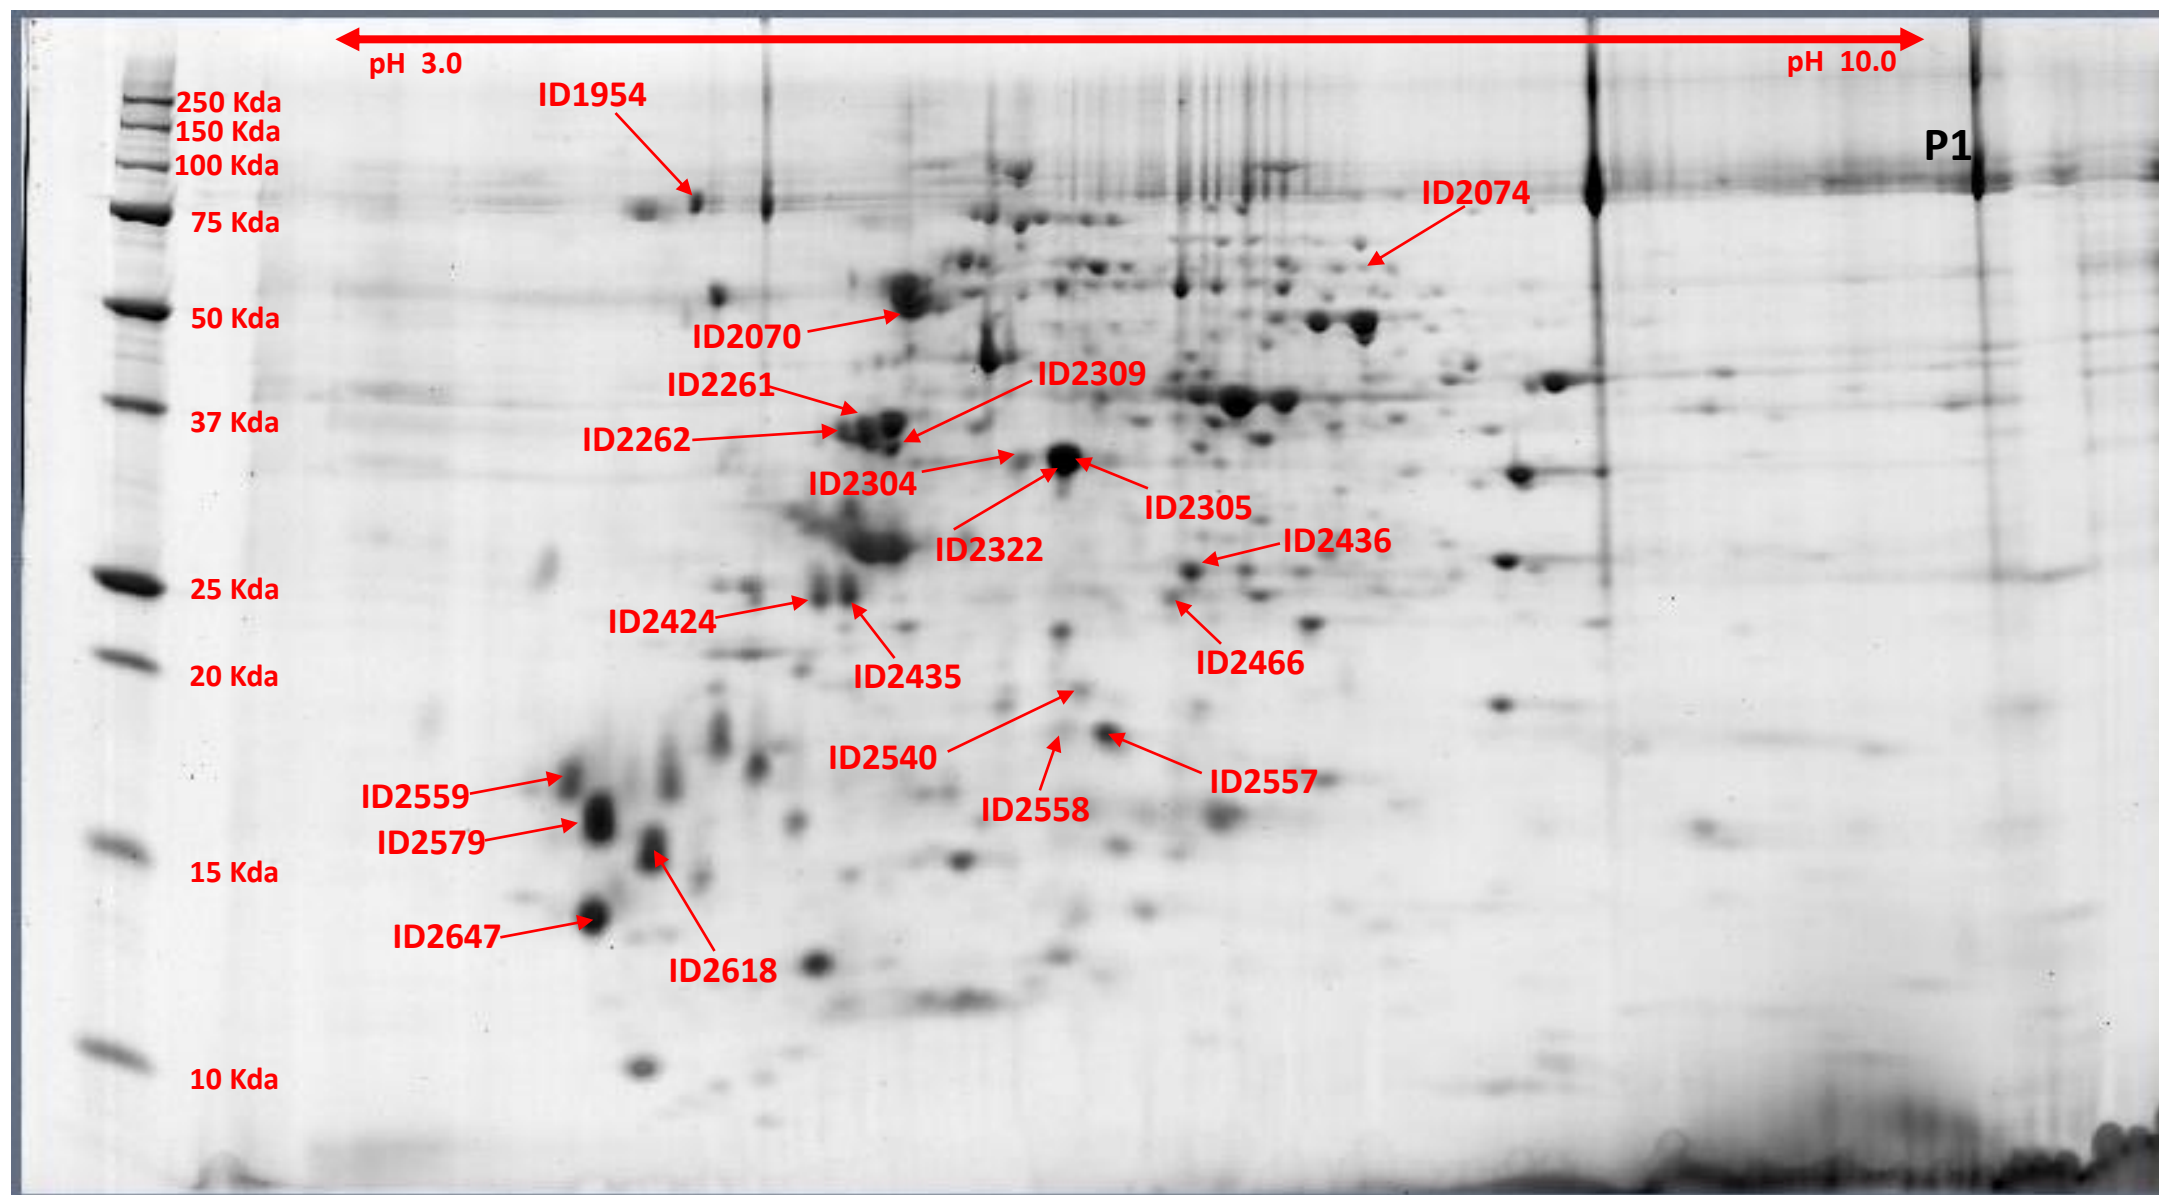



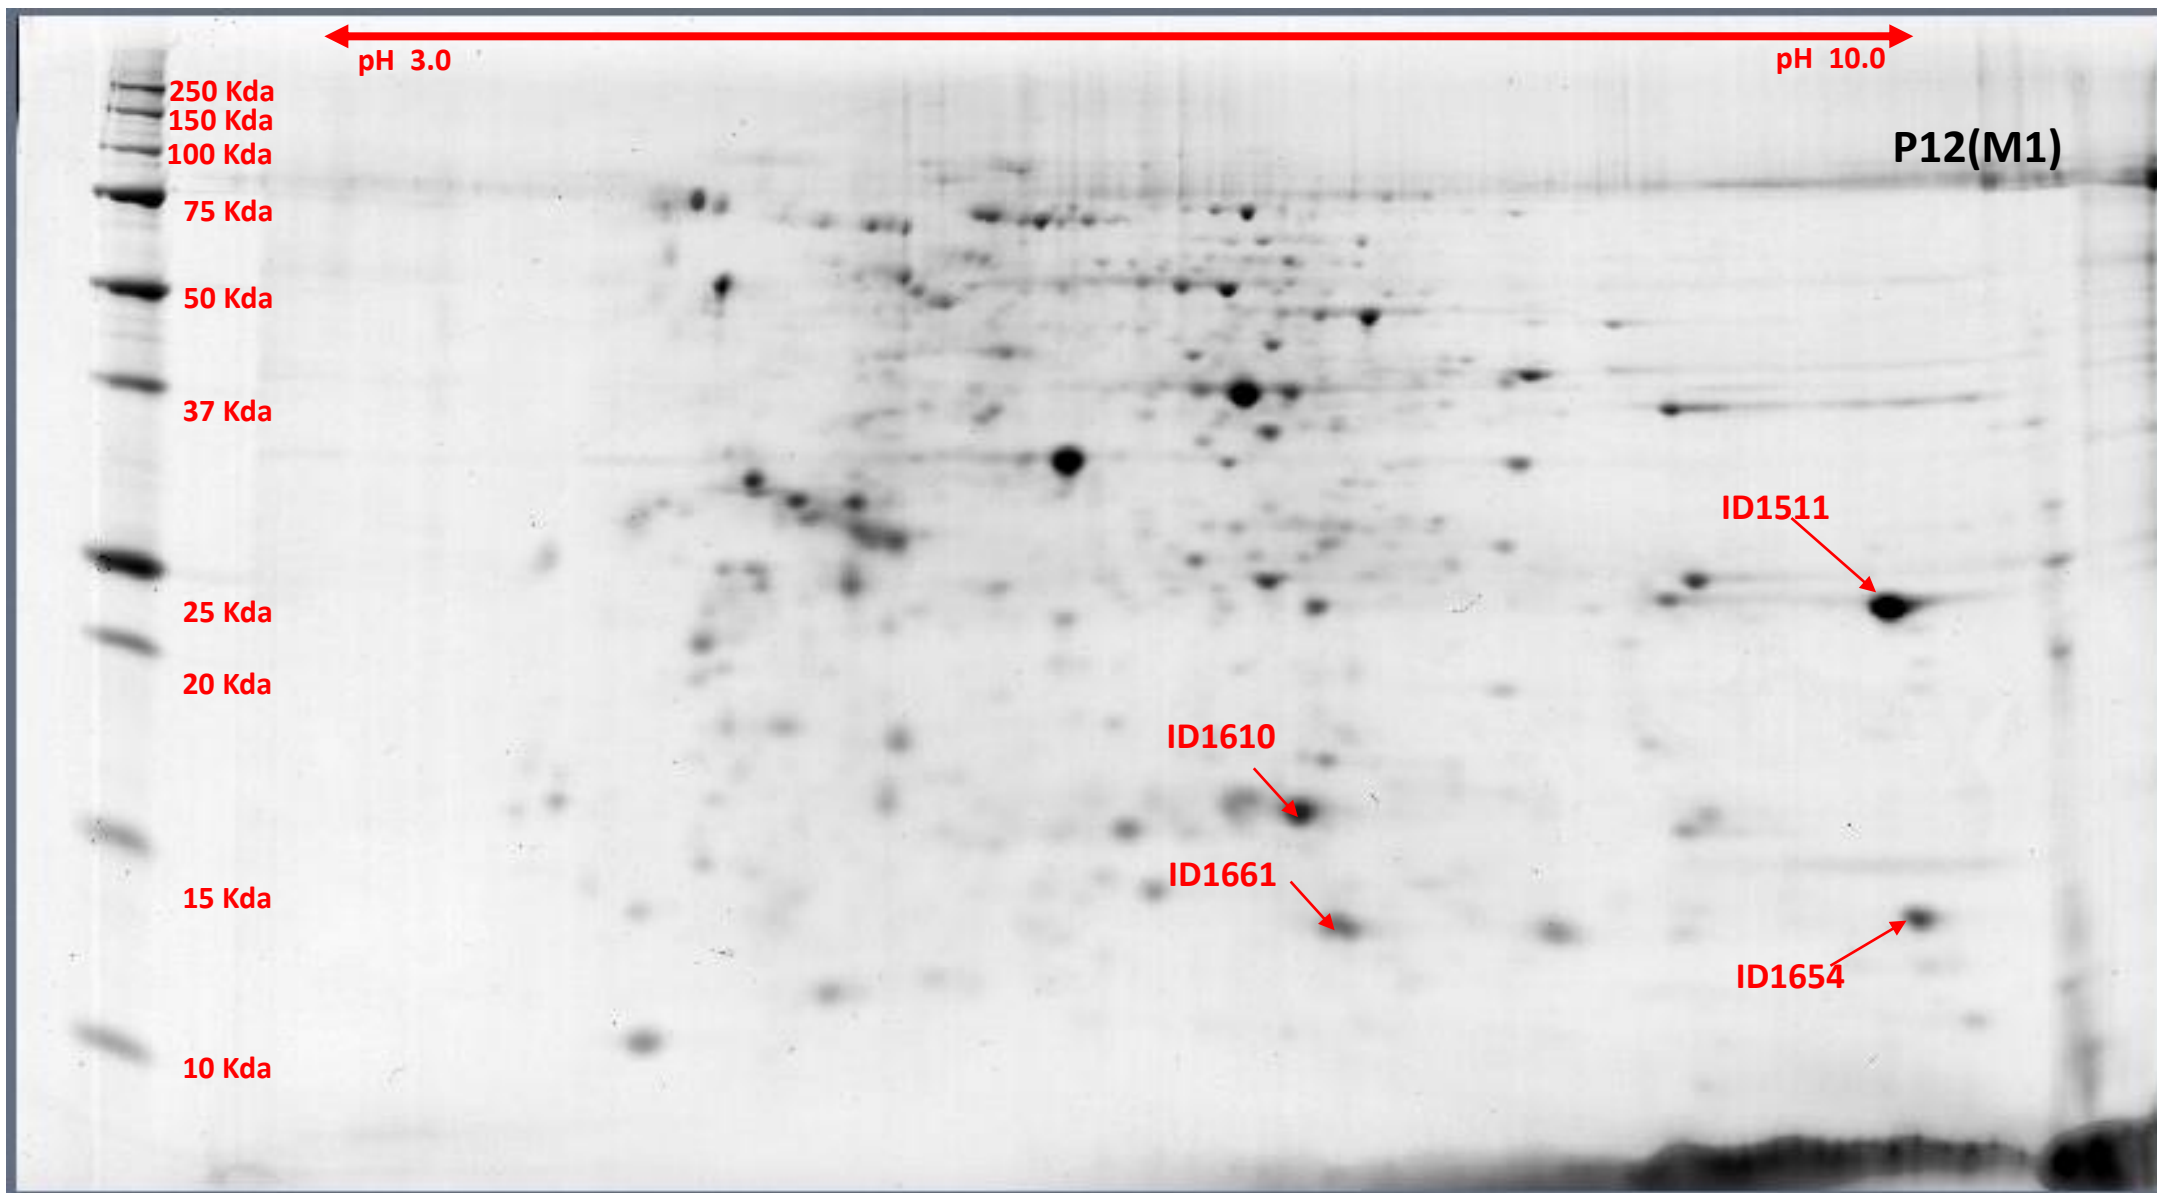

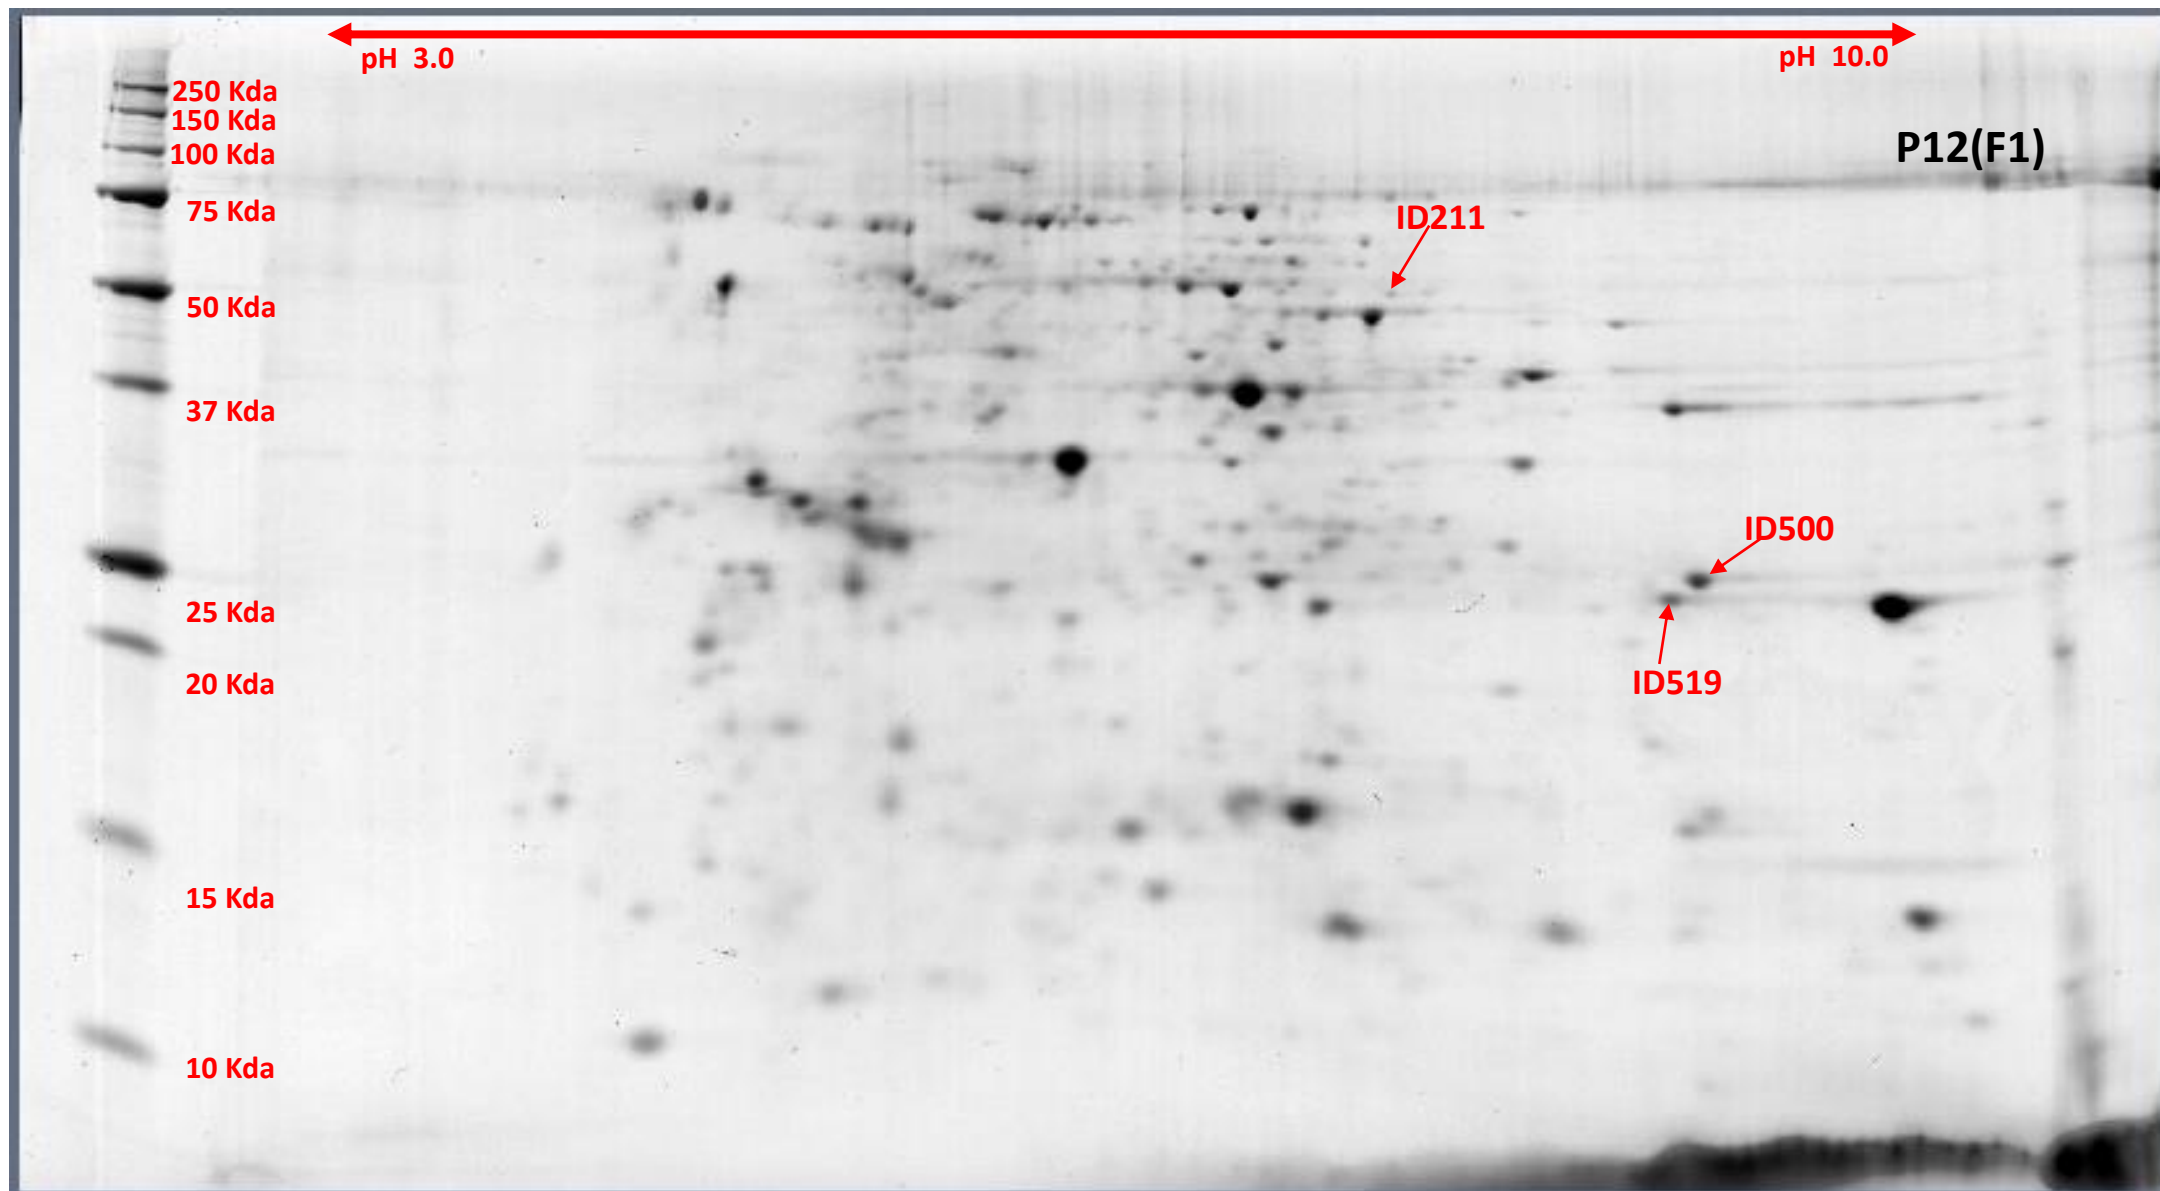

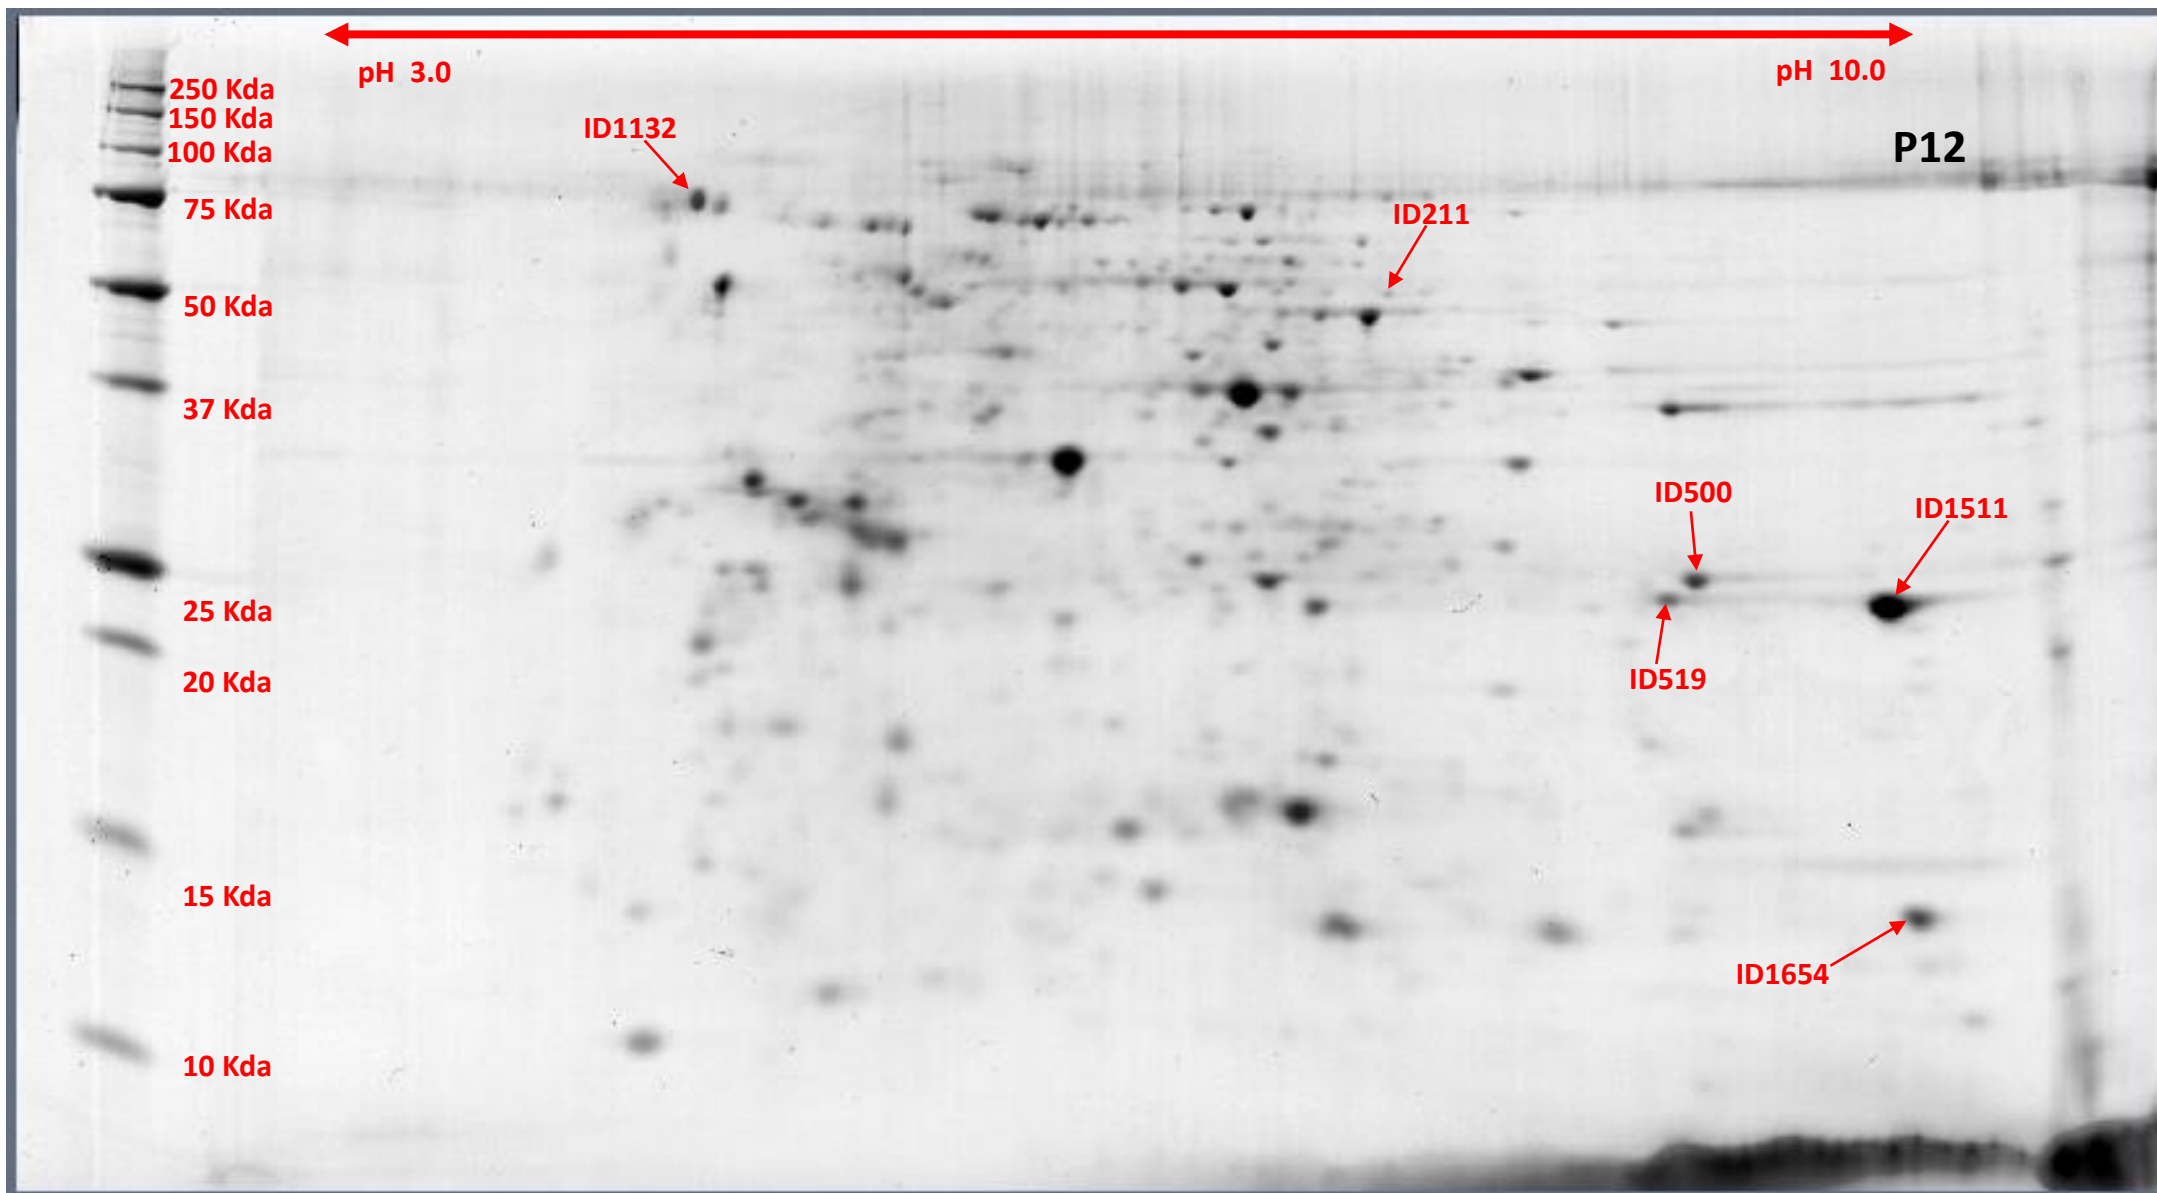

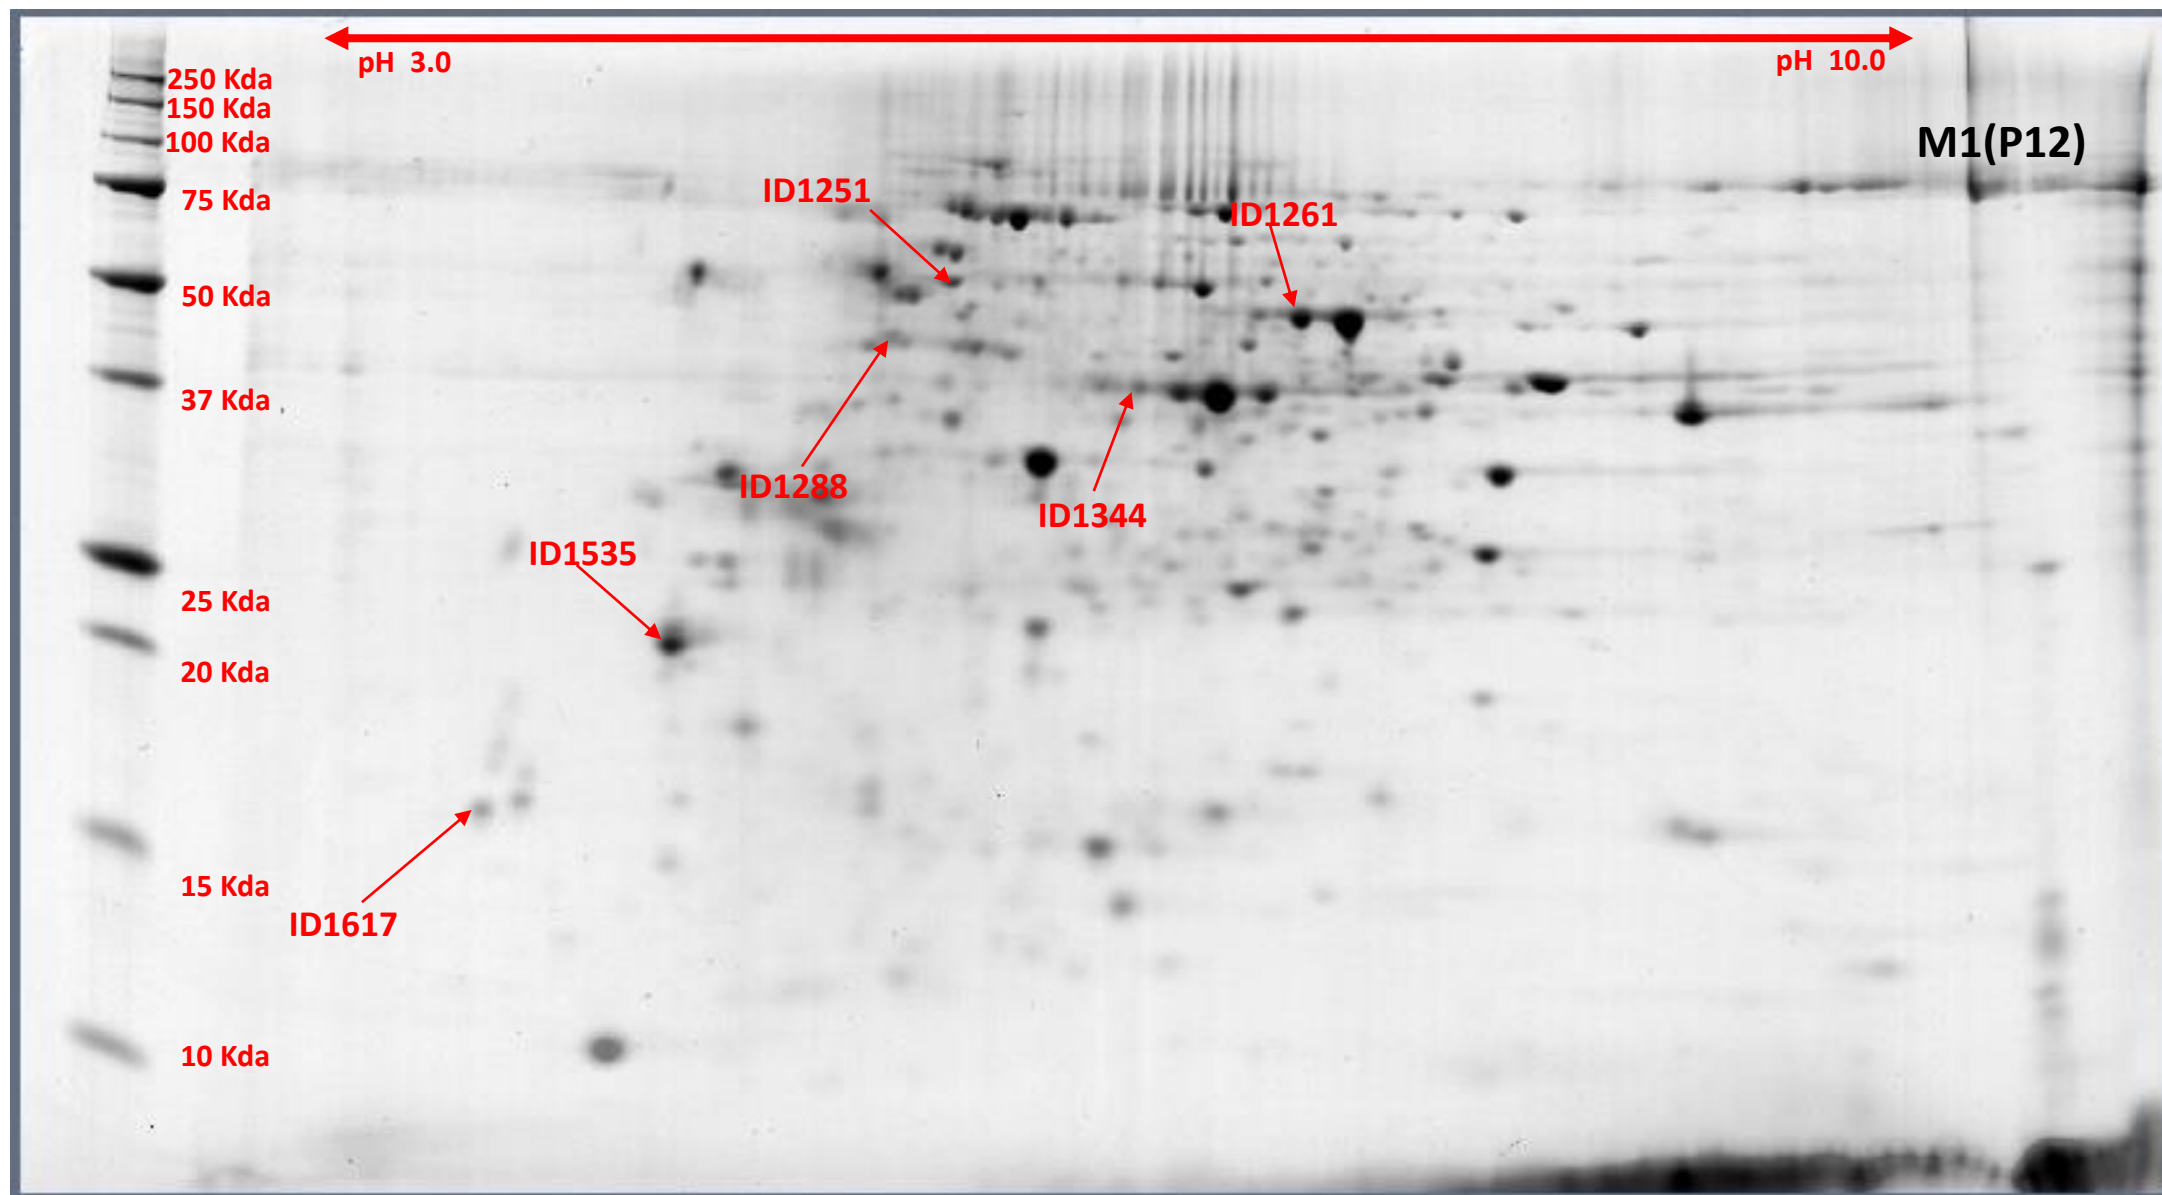



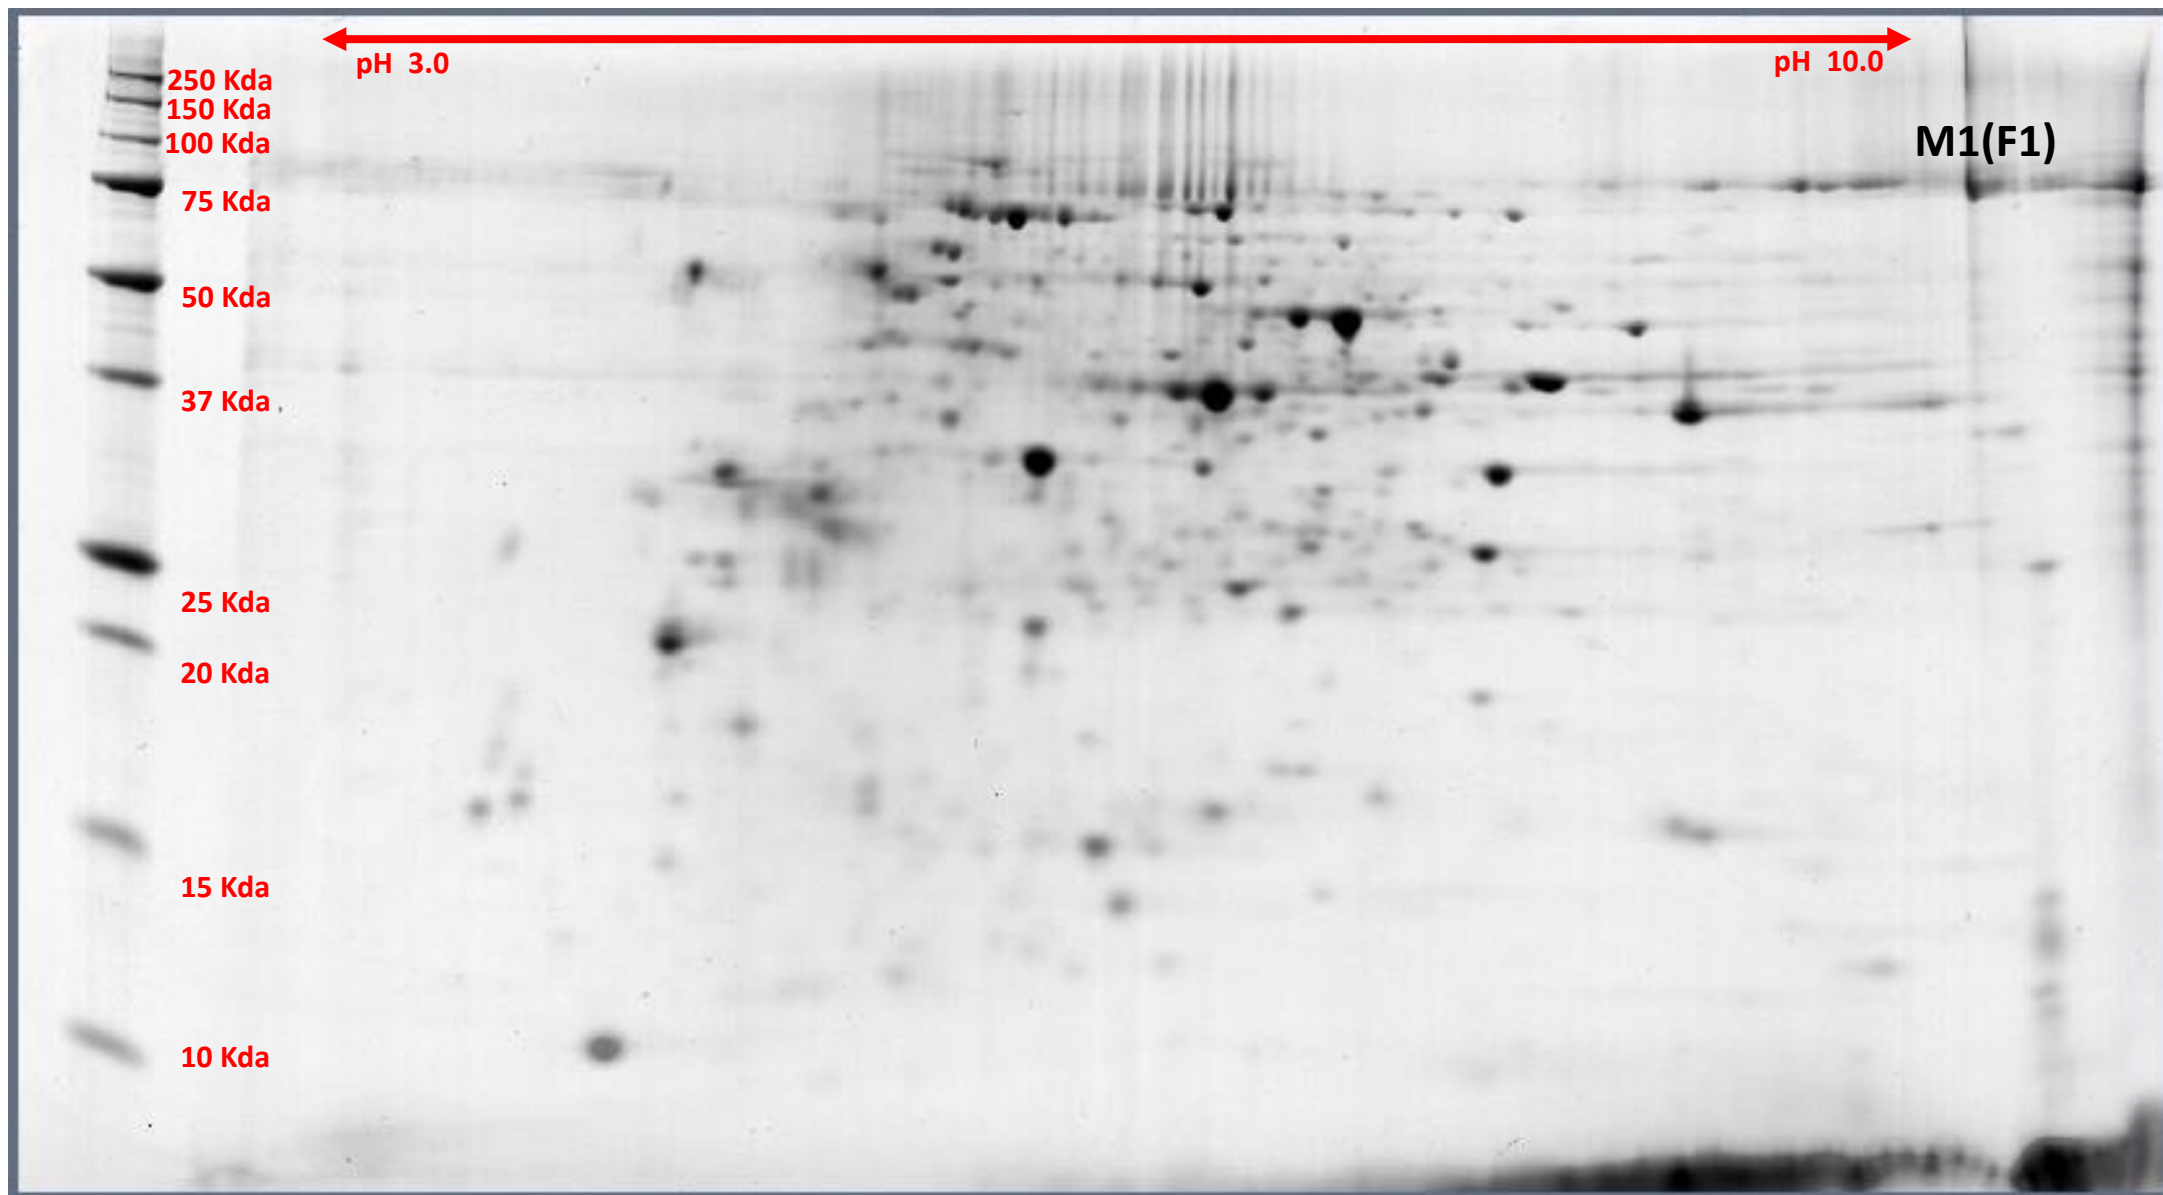

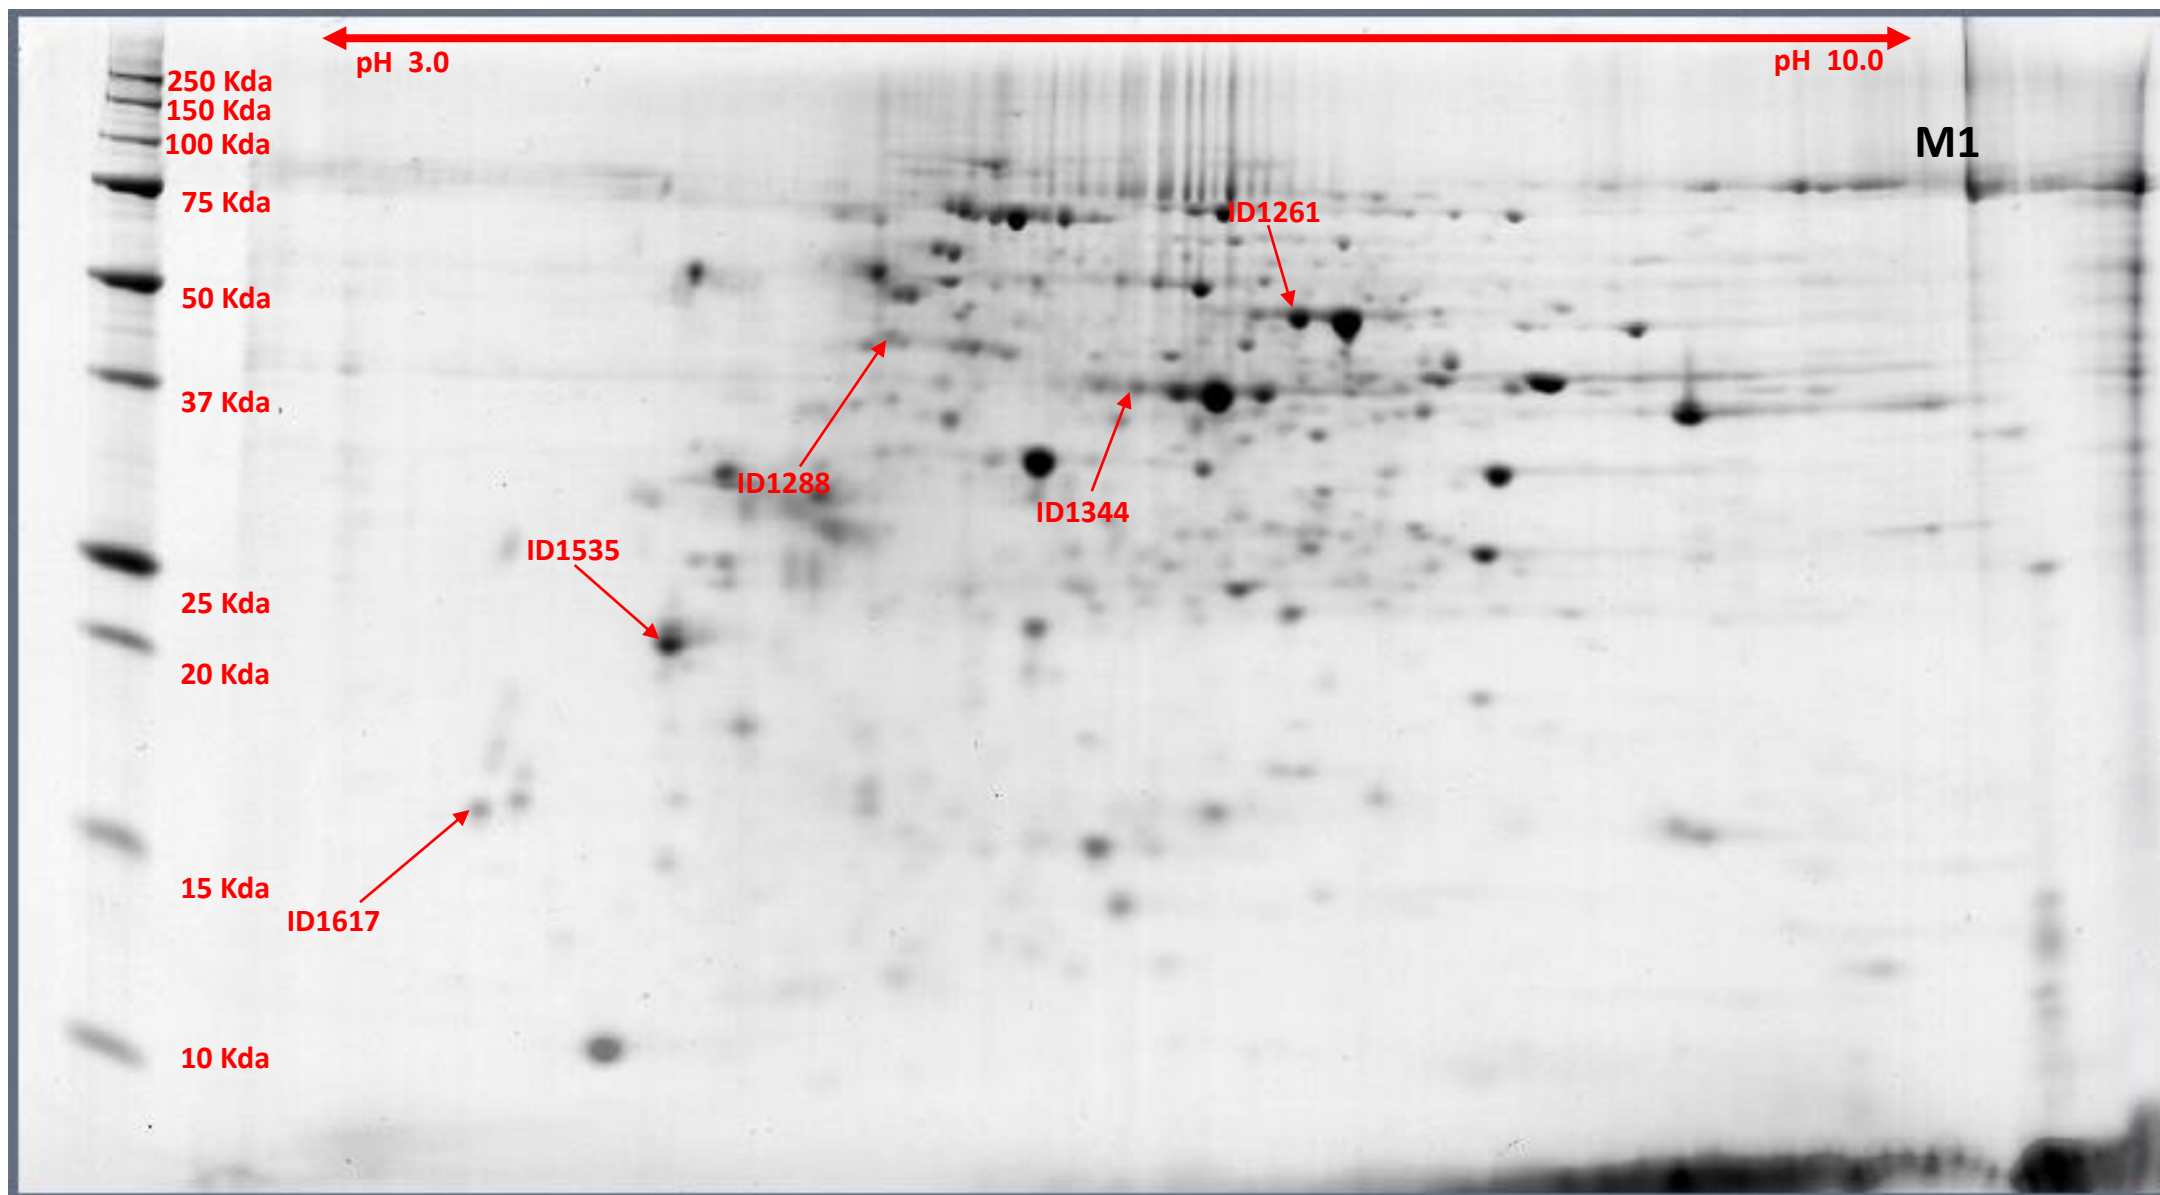

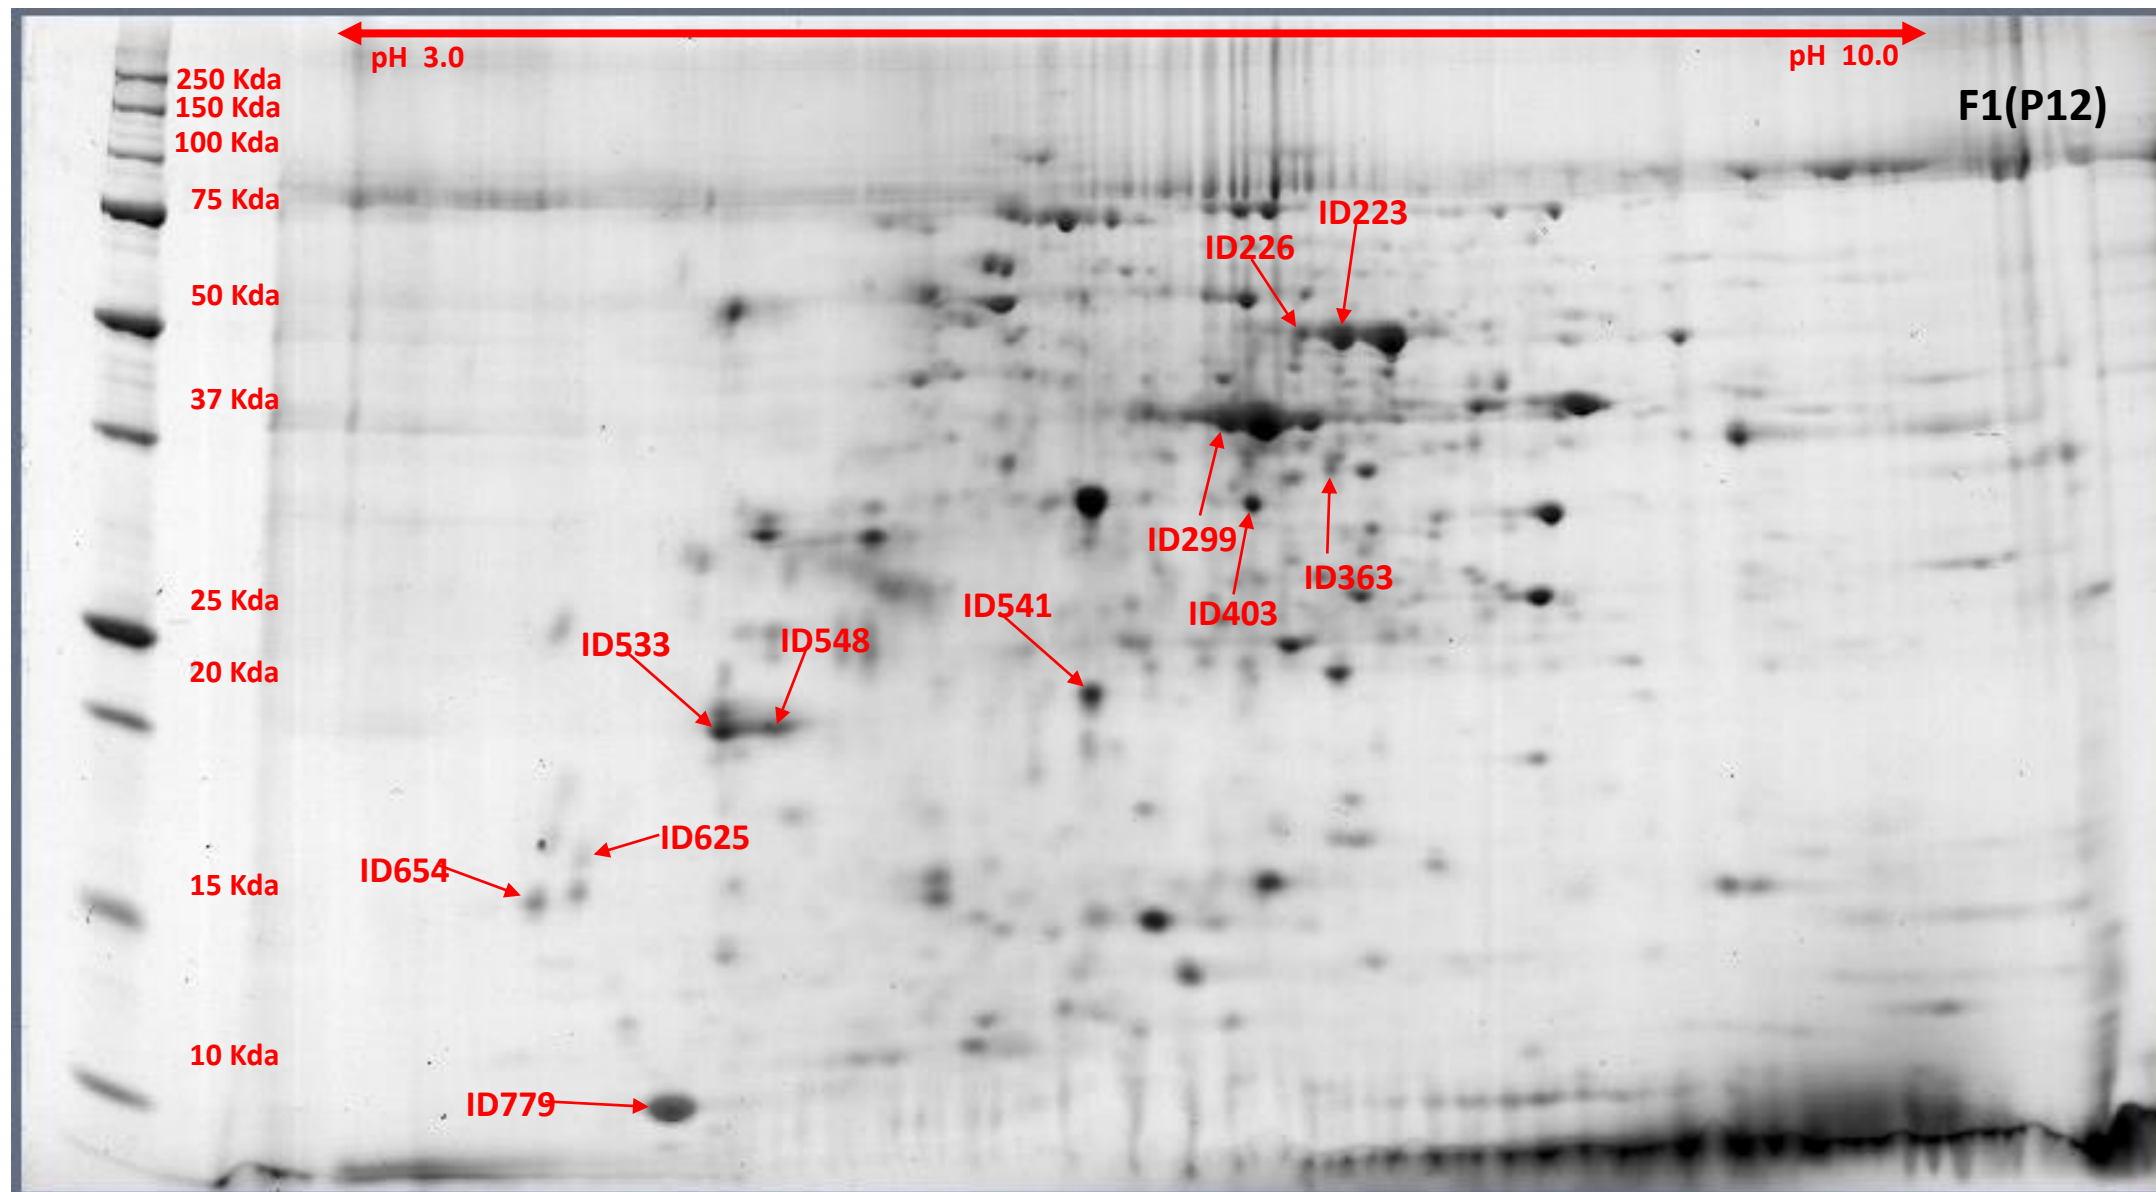

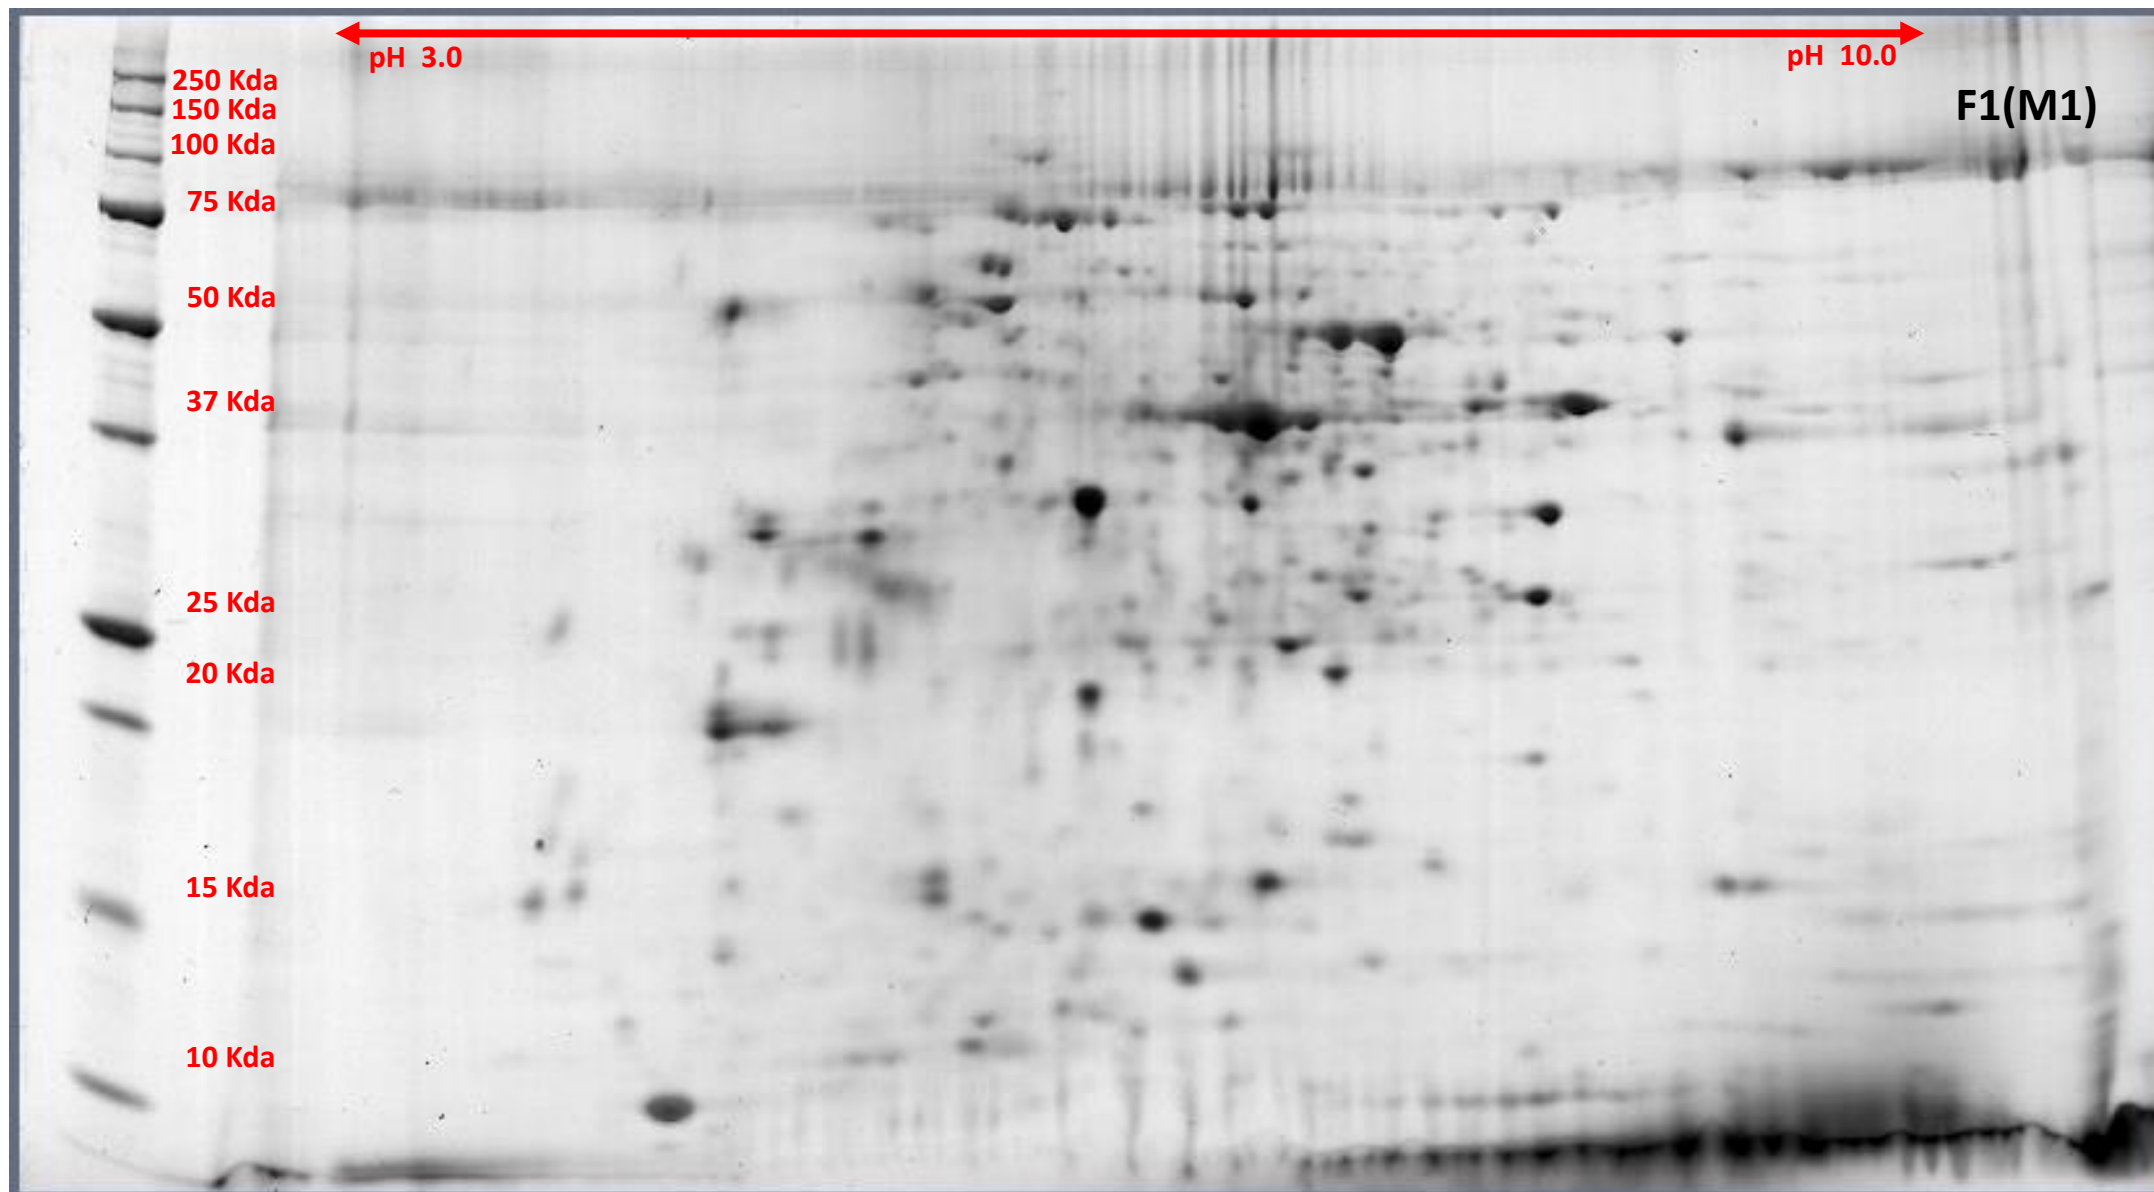

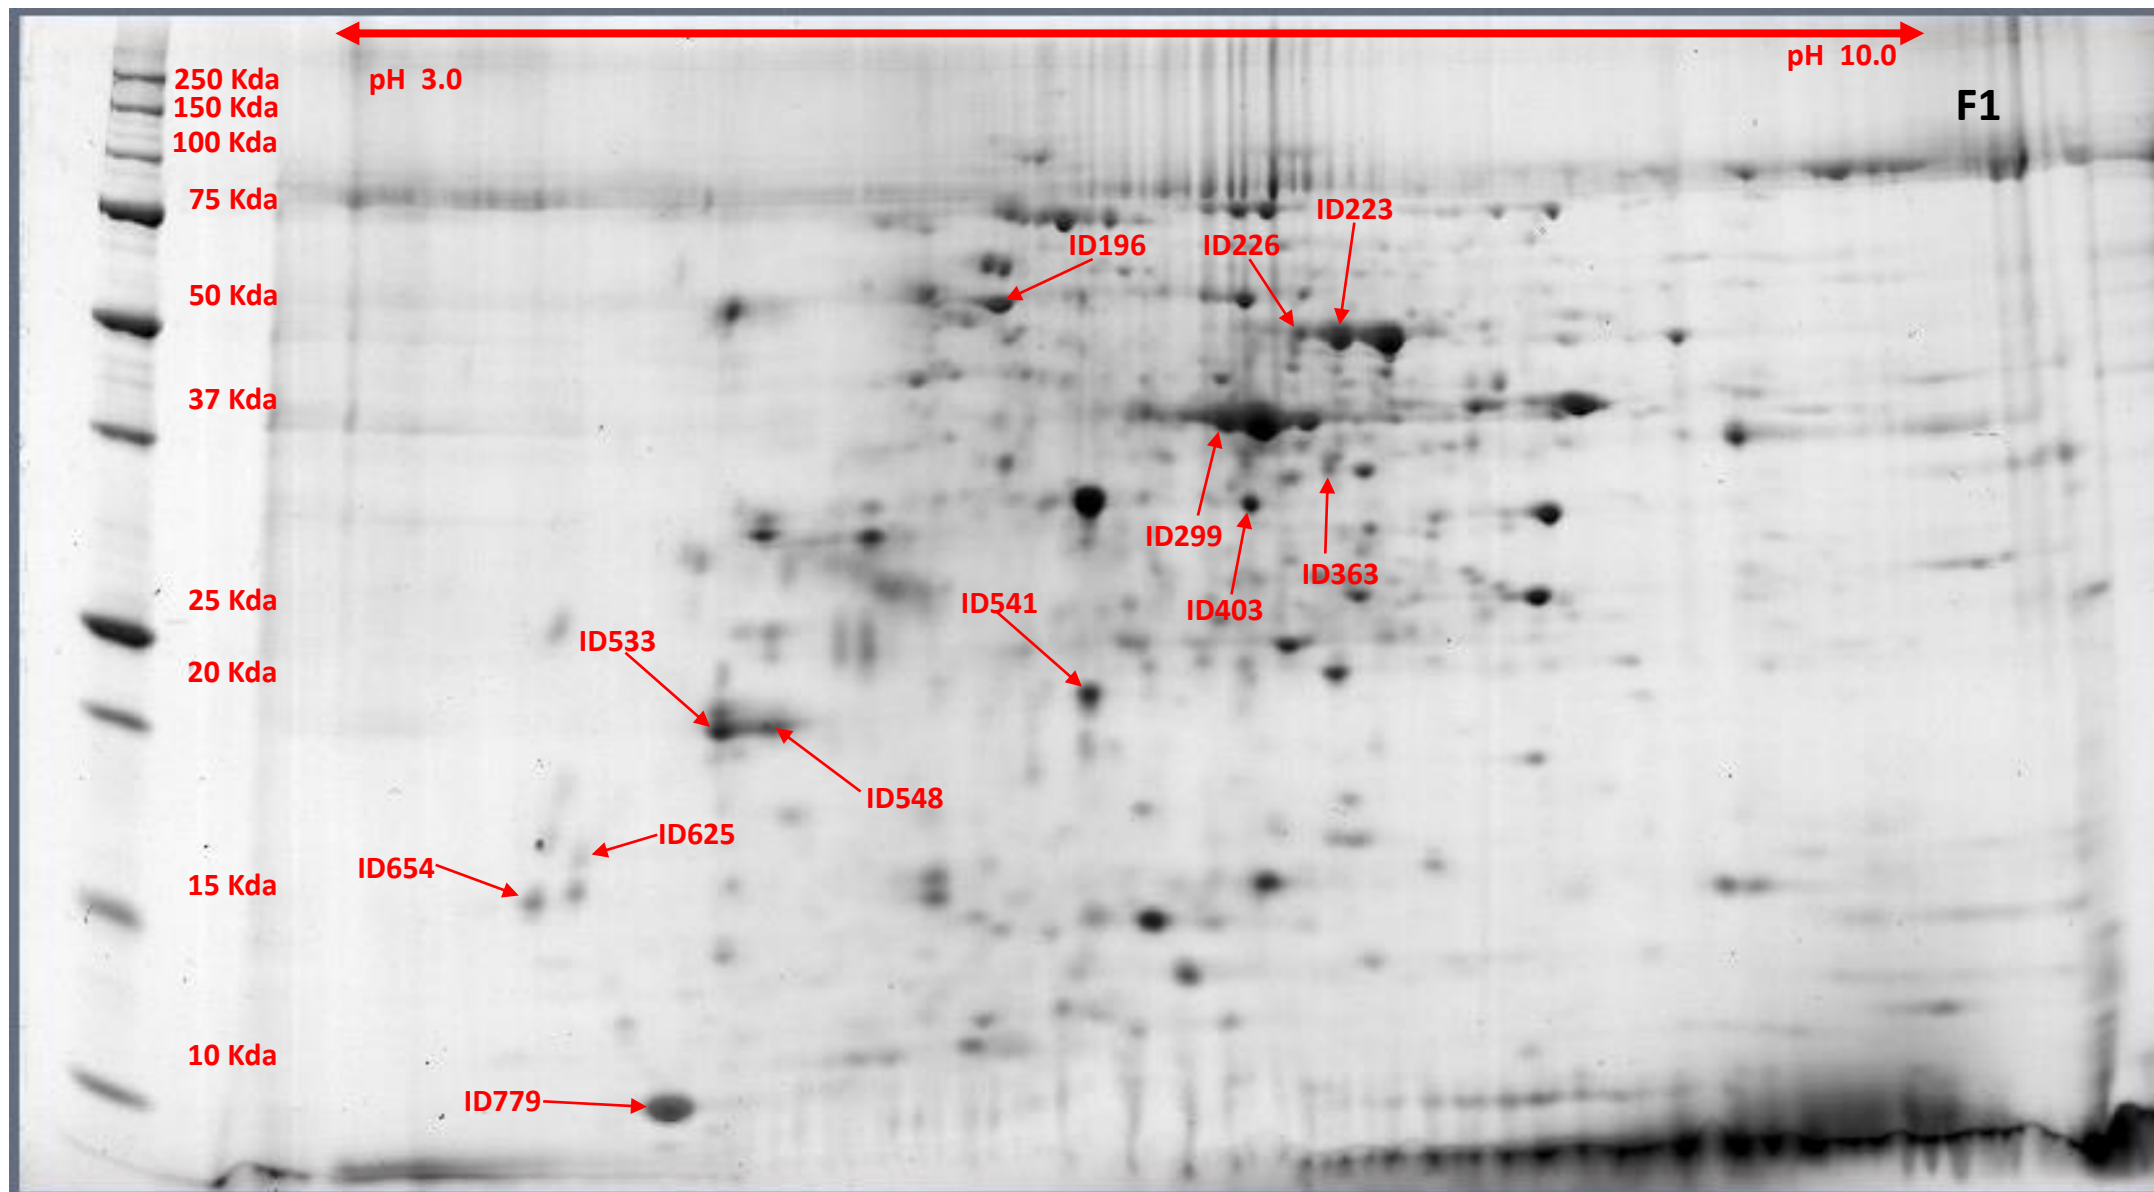



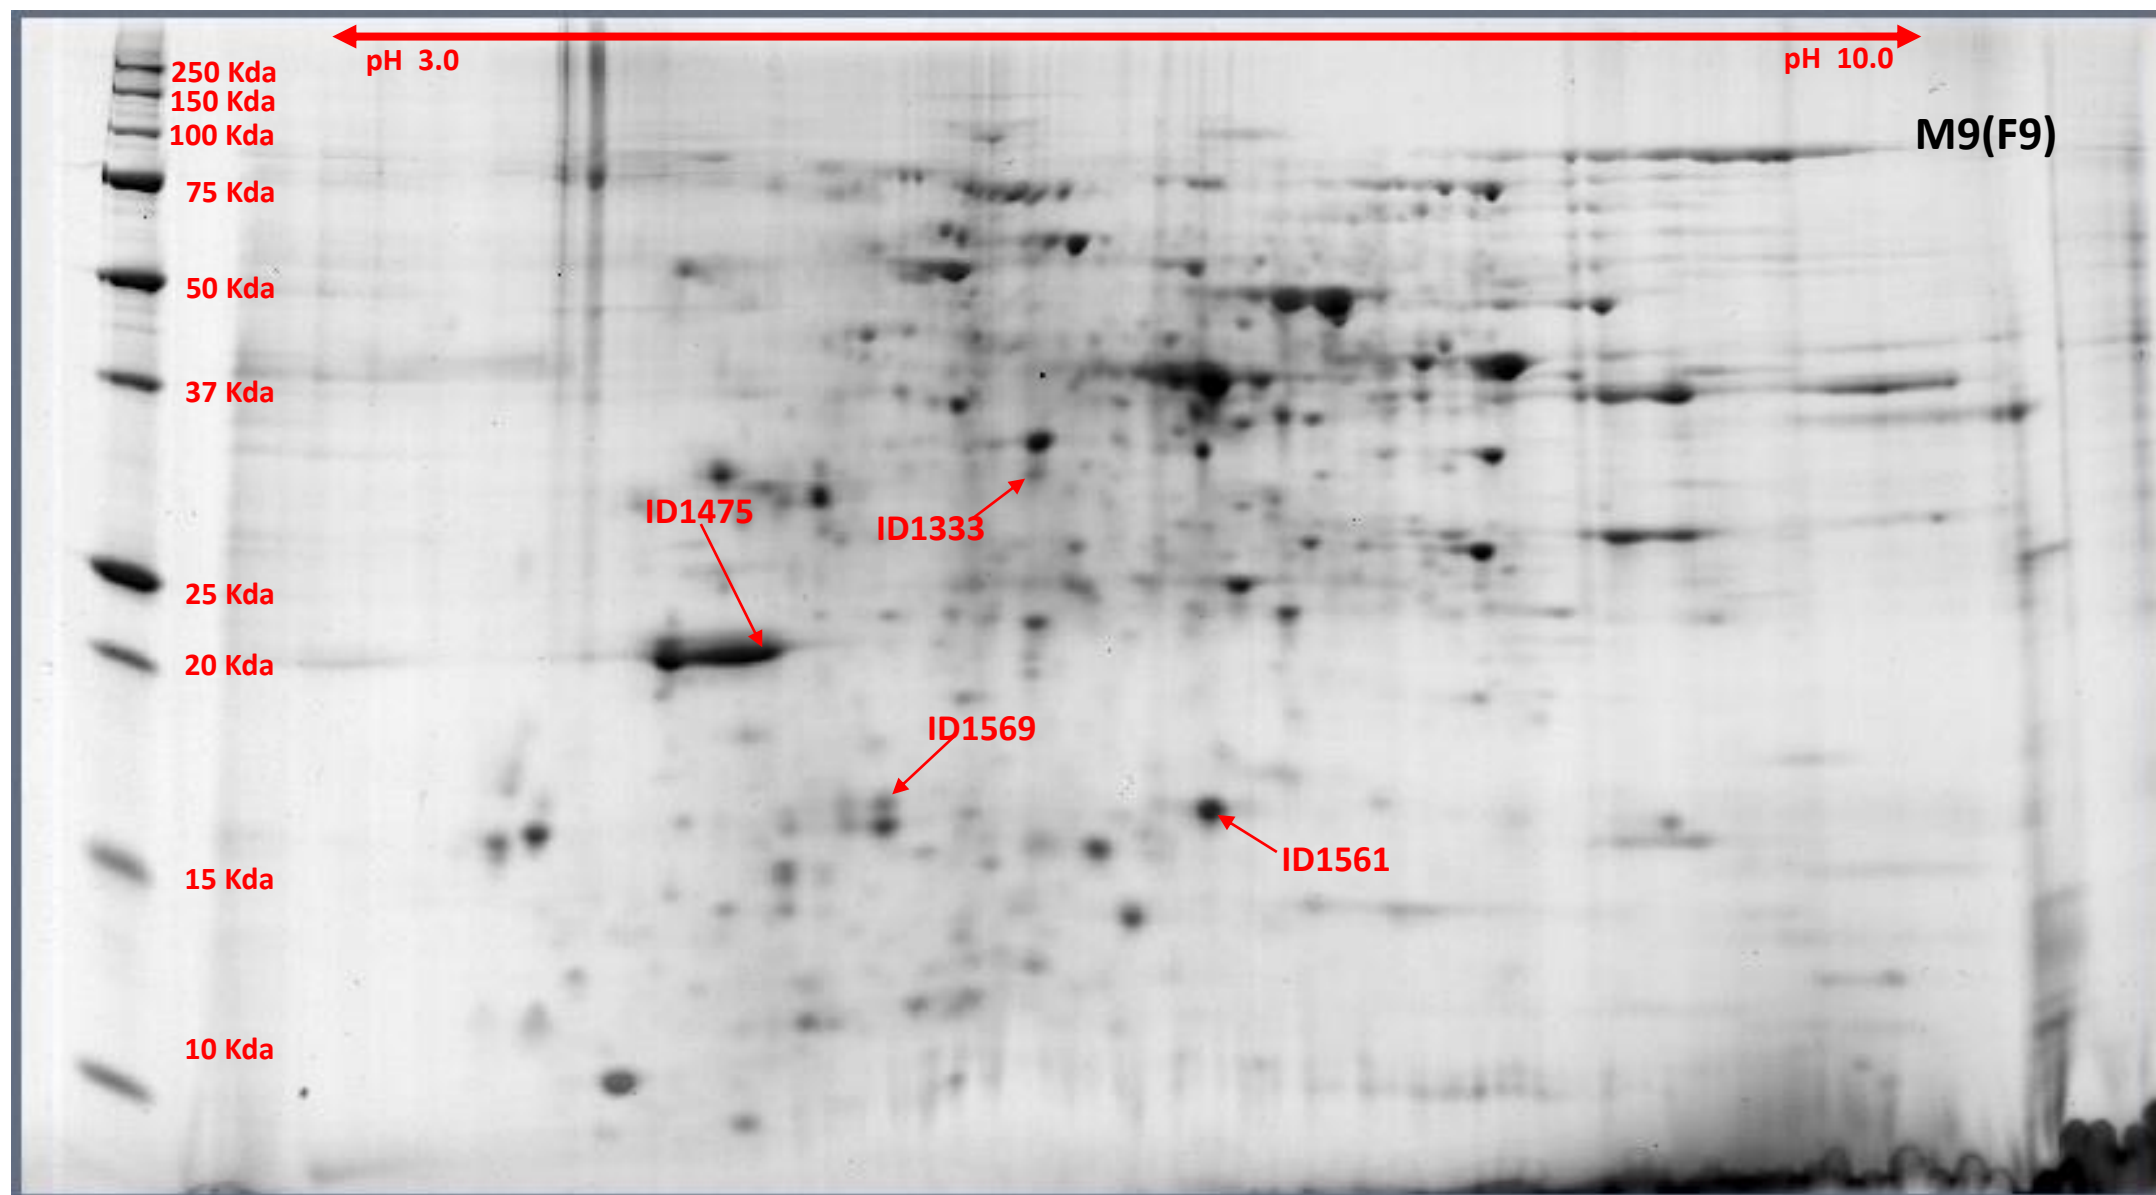

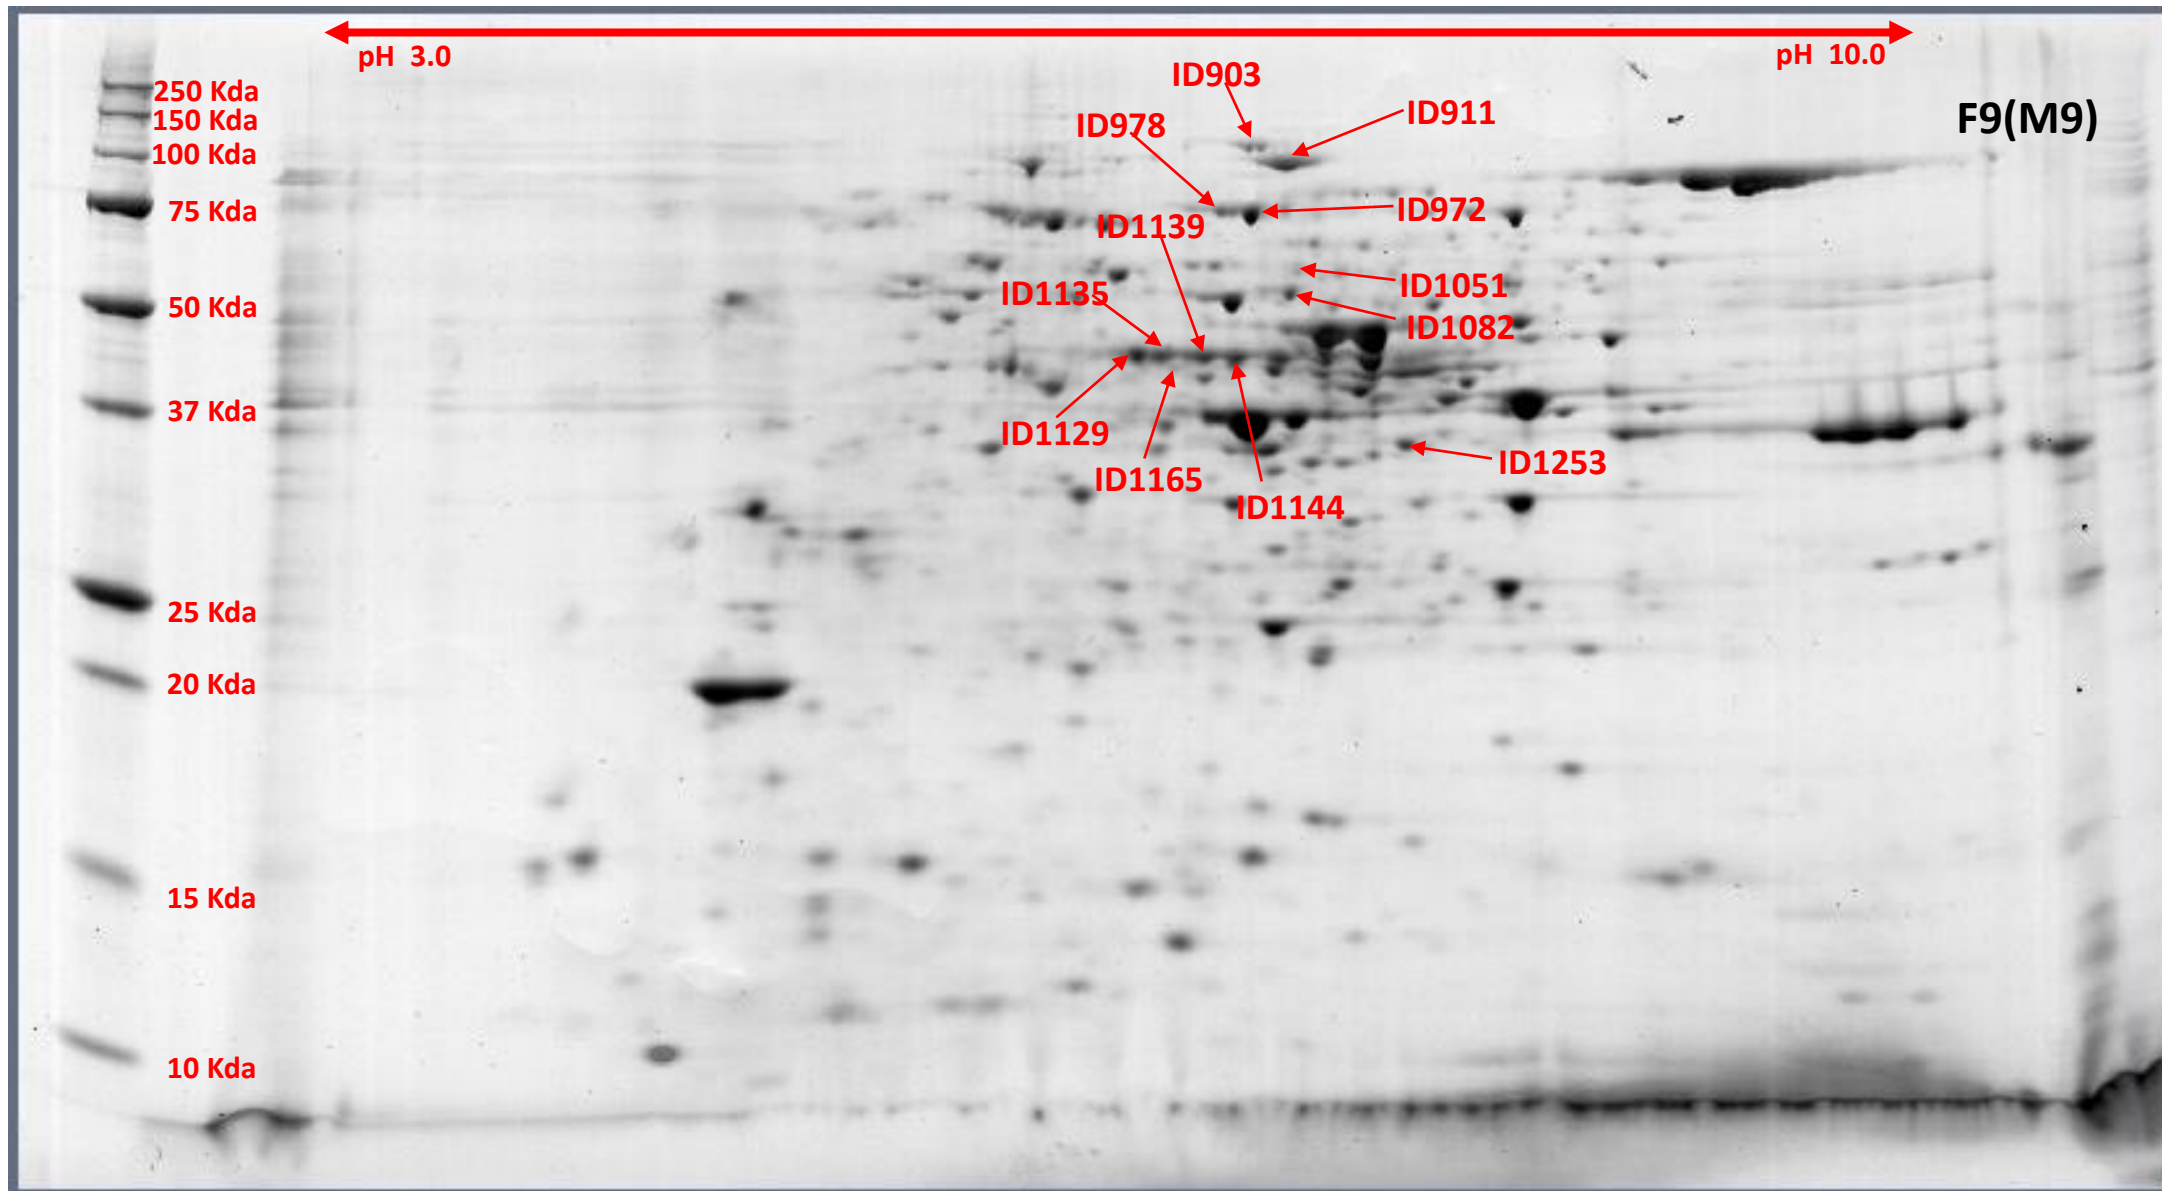

Supplement: s1 [file s1]
